# Supplementary material
Source: publisher site journal article supplement (https://www.dovepress.com/get_supplementary_file.php?f=489139.docx)
Supplement: Supplementary file 1 [file get_supplementary_file.php]

Supplementary Material

RID: GJ7CNWKC013

Job Title:Nucleotide Sequence

Program: BLASTN

Database: rRNA_typestrains/ITS_RefSeq_Fungi Internal transcribed spacer region (ITS) from Fungi type and reference material

Query #1: Query ID: lcl|Query_3234203 Length: 489

Sequences producing significant alignments:

Scientific Common Max Total Query E Per. Acc.

Description Name Name Taxid Score Score cover Value Ident Len Accession

Hortaea werneckii CBS 107.67 ITS region; from TYPE material Hortaea wern... NA 91943 802 802 95% 0.0 97.86 472 NR_145338.1

Eupenidiella venezuelensis CBS 106.75 ITS region; from TYPE... Eupenidiella... NA 1431930 658 658 93% 0.0 92.69 577 NR_153971.1

Salinomyces polonicus CBS 147480 ITS region; from TYPE material Salinomyces ... NA 2810478 601 601 98% 5e-172 89.39 522 NR_175161.1

Stenella araguata ITS region; from TYPE material Stenella ara... NA 93486 586 586 98% 1e-167 88.60 659 NR_156511.1

Pseudotaeniolina globosa CBS 109889 ITS region; from TYPE... Pseudotaenio... NA 205029 564 564 95% 6e-161 88.84 469 NR_136960.1

Salinomyces thailandica CBS 125423 ITS region; from TYPE material Salinomyces ... NA 706561 562 562 93% 2e-160 89.06 722 NR_171710.1

Catenulostroma hermanusense CBS 128768 ITS region; from TYPE... Catenulostro... NA 1049284 555 555 93% 4e-158 88.84 656 NR_137065.1

Recurvomyces mirabilis CBS 119434 ITS region; from TYPE material Recurvomyces... NA 574656 553 553 93% 1e-157 88.60 582 NR_137024.1

Meristemomyces arctostaphylos ITS region; from TYPE material Meristemomyc... NA 1871376 545 545 98% 2e-155 87.81 552 NR_155391.1

Haniomyces dodonaeae KUMCC 20-0220 ITS region; from TYPE material Haniomyces d... NA 2789769 538 538 97% 4e-153 87.37 481 NR_172440.1

Neocatenulostroma castaneae MFLUCC 17-2188 ITS region; from TY... Neocatenulos... NA 2856160 536 536 91% 1e-152 88.74 488 NR_176757.1

Batcheloromyces sedgefieldii CBS 112119 ITS region; from TYPE... Batcheloromy... NA 531802 525 525 98% 3e-149 86.94 700 NR_137012.1

Teratosphaeria agapanthi ITS region; from TYPE material Teratosphaer... NA 1051331 512 512 86% 2e-145 88.99 643 NR_169894.1

Neophaeothecoidea proteae CBS 114129 ITS region; from TYPE... Neophaeothec... NA 1434220 508 508 98% 3e-144 86.23 708 NR_157417.1

Lapidomyces hispanicus CBS 118355 ITS region; from TYPE material Lapidomyces ... NA 1508185 507 507 81% 1e-143 90.05 466 NR_144960.1

Lapidomyces epipinicola KRAM F-59827 ITS region; from TYPE... Lapidomyces ... NA 3032637 505 505 98% 4e-143 86.18 527 NR_191225.1

Meristemomyces frigidus CCFEE 5508 ITS region; from TYPE material Meristemomyc... NA 1508187 505 505 77% 4e-143 91.27 466 NR_144973.1

Teratosphaeria combreti CBS 146985 ITS region; from TYPE material Teratosphaer... NA 2831577 503 503 93% 1e-142 87.07 532 NR_173053.1

Lapidomyces aloidendricola CBS 146968 ITS region; from TYPE... Lapidomyces ... NA 2831558 499 499 98% 2e-141 85.98 546 NR_173048.1

Penidiellopsis ramosus CBMAI 1937 ITS region; from TYPE material Penidiellops... NA 2596800 497 497 93% 6e-141 86.75 688 NR_164384.1

Teratosphaericola leucadendri CBS 146993 ITS region; from TYPE... Teratosphaer... NA 2831578 497 497 98% 6e-141 85.92 539 NR_173039.1

Catenulostroma lignicola CBS 130285 ITS region; from TYPE... Catenulostro... NA 2016434 496 496 90% 2e-140 87.08 595 NR_154848.1

Constantinomyces nebulosus CBS 117941 ITS region; from TYPE... Constantinom... NA 307346 496 496 90% 2e-140 87.28 464 NR_156201.1

Pseudoteratosphaeria flexuosa CBS 111012 ITS region; from TYPE... Pseudoterato... NA 1431944 494 494 81% 8e-140 89.22 496 NR_155635.1

Teratosphaeria hortaea CBS 124156 ITS region; from TYPE material Teratosphaer... NA 634213 494 494 93% 8e-140 86.72 604 NR_156520.1

Penidiella ellipsoidea CBS 128773 ITS region; from TYPE material Penidiella e... NA 1049289 492 492 93% 3e-139 86.64 645 NR_137773.1

Monticola elongata CCFEE 5394 ITS region; from TYPE material Monticola el... NA 1508191 488 488 88% 4e-138 87.41 464 NR_144972.1

Pseudoteratosphaeria secundaria ITS region; from TYPE material Pseudoterato... NA 1431949 488 488 81% 4e-138 88.97 482 NR_144978.1

Xenophacidiella pseudocatenata CBS 128776 ITS region; from TYP... Xenophacidie... NA 1049485 488 488 89% 4e-138 87.28 626 NR_137066.1

Teratosphaeria biformis CBS 124578 ITS region; from TYPE material Teratosphaer... NA 665064 486 486 77% 1e-137 90.53 482 NR_137699.1

Teratosphaeria micromaculata CBS 124582 ITS region; from TYPE... Teratosphaer... NA 665069 486 486 77% 1e-137 90.53 486 NR_137698.1

Constantinomyces macerans TRN 440 ITS region; from TYPE material Constantinom... NA 1508192 486 486 86% 1e-137 87.88 462 NR_164011.1

Lapidomyces stipagrostidicola CBS 146979 ITS region; from TYPE... Lapidomyces ... NA 2831559 484 484 98% 5e-137 85.45 543 NR_173043.1

Constantinomyces oldenburgensis CBS 144642 ITS region; from TY... Constantinom... NA 1425372 483 483 96% 2e-136 85.36 581 NR_159758.1

Teratosphaeria complicata CBS 125216 ITS region; from TYPE... Teratosphaer... NA 688225 483 483 86% 2e-136 87.73 501 NR_160236.1

Teratosphaeria miniata ITS region; from TYPE material Teratosphaer... NA 688227 483 483 86% 2e-136 87.73 636 NR_156534.1

Penidiella drakensbergensis CPC 19778 ITS region; from TYPE... Penidiella d... NA 1280618 481 481 98% 6e-136 85.10 547 NR_111821.1

Friedmanniomyces endolithicus CCFEE 5208 ITS region; from TYPE... Friedmanniom... NA 329885 481 481 93% 6e-136 85.99 516 NR_144917.1

Devriesia tardicrescens CBS 128770 ITS region; from TYPE material Devriesia ta... NA 1049286 481 481 88% 6e-136 87.33 603 NR_137771.1

Caatingomyces brasiliensis URM 7916 ITS region; from TYPE... Caatingomyce... NA 2571972 479 479 86% 2e-135 87.44 494 NR_191078.1

Teratosphaericola pseudoafricana CBS 114782 ITS region; from... Teratosphaer... NA 1431956 479 479 89% 2e-135 87.05 489 NR_154468.1

Elasticomyces elasticus CBS 122538 ITS region; from TYPE material Elasticomyce... NA 574655 477 477 98% 8e-135 85.15 532 NR_137023.1

Acrodontium neolitseae CBS 137975 ITS region; from TYPE material Acrodontium ... NA 1508272 475 475 93% 3e-134 86.02 550 NR_168148.1

Parateratosphaeria persoonii CBS 122895 ITS region; from TYPE... Parateratosp... NA 1434225 475 475 98% 3e-134 85.09 629 NR_145096.1

Teratosphaericola ellenclarkiae BRIP 72385b ITS region; from... Teratosphaer... NA 2984269 473 473 79% 1e-133 89.06 592 NR_182629.1

Teratosphaeria foliensis CBS 124581 ITS region; from TYPE... Teratosphaer... NA 665067 473 473 86% 1e-133 87.30 489 NR_137818.1

Pseudoteratosphaeria ohnowa ITS region; from TYPE material Pseudoterato... NA 1431946 473 473 82% 1e-133 88.26 483 NR_144977.1

Acrodontium crateriforme CBS 144.33 ITS region; from TYPE... Acrodontium ... NA 150365 473 473 89% 1e-133 86.74 459 NR_152320.1

Devriesia shelburniensis DAOM 226676 ITS region; from TYPE... Devriesia sh... NA 286566 472 472 81% 4e-133 88.56 448 NR_111177.1

Xenopenidiella rigidophora CBS 314.95 ITS region; from TYPE... Xenopenidiel... NA 1431960 470 470 93% 1e-132 85.53 566 NR_175015.1

Catenulostroma corymbiae CPC 19435 ITS region; from TYPE material Catenulostro... NA 1280628 470 470 93% 1e-132 85.50 657 NR_120229.1

Teratosphaeria brunneotingens CPC 13303 ITS region; from TYPE... Teratosphaer... NA 713470 470 470 77% 1e-132 89.74 631 NR_163274.1

Euteratosphaeria verrucosiafricana CPC 11167 ITS region; from... Euteratospha... NA 1515436 470 470 98% 1e-132 84.71 488 NR_164213.1

Constantinomyces patonensis CBS 117950 ITS region; from TYPE... Constantinom... NA 307364 470 470 88% 1e-132 86.65 471 NR_164010.1

Xenopenidiella nigrescens CBMAI 1943 ITS region; from TYPE... Xenopenidiel... NA 2596804 468 468 91% 5e-132 86.15 533 NR_164388.1

Xenopenidiella formica CBMAI 1941 ITS region; from TYPE material Xenopenidiel... NA 2596802 468 468 82% 5e-132 87.99 468 NR_164386.1

Caeliomyces tampanus CBS 148275 ITS region; from TYPE material Caeliomyces ... NA 2888286 468 468 93% 5e-132 85.62 531 NR_175224.1

Myrtapenidiella pleurocarpae ITS region; from TYPE material Myrtapenidie... NA 2014843 466 466 95% 2e-131 85.08 535 NR_155414.1

Teratosphaeria stellenboschiana CBS 116428 ITS region; from TY... Teratosphaer... NA 470158 466 466 86% 2e-131 87.04 486 NR_175014.1

Teratosphaeria terminaliae ITS region; from TYPE material Teratosphaer... NA 1414641 466 466 79% 2e-131 88.64 644 NR_137841.1

Teratosphaeria encephalarti CPC 14886 ITS region; from TYPE... Teratosphaer... NA 570530 466 466 86% 2e-131 86.76 638 NR_137022.1

Xenopenidiella tarda CBMAI 1940 ITS region; from TYPE material Xenopenidiel... NA 2596801 464 464 89% 6e-131 86.20 541 NR_164385.1

Myrtapenidiella eucalyptigena ITS region; from TYPE material Myrtapenidie... NA 2014842 464 464 89% 6e-131 86.10 520 NR_155412.1

Parateratosphaeria stirlingiae CPC 29252 ITS region; from TYPE... Parateratosp... NA 2014848 464 464 91% 6e-131 85.91 531 NR_155699.1

Catenulostroma elginense STE-U 1958 ITS region; from TYPE... Catenulostro... NA 237593 464 464 80% 6e-131 88.38 483 NR_145089.1

Petrophila incerta CBS 118608 ITS region; from TYPE material Petrophila i... NA 748606 464 464 81% 6e-131 87.90 463 NR_144956.1

Teratosphaeria gracilis ITS region; from TYPE material Teratosphaer... NA 2498248 462 462 86% 2e-130 86.87 501 NR_161146.1

Readeriella pseudocallista ITS region; from TYPE material Readeriella ... NA 688223 462 462 93% 2e-130 85.47 630 NR_157419.1

Acrodontium luzulae CBS 839.71 ITS region; from TYPE material Acrodontium ... NA 1873232 462 462 93% 2e-130 85.50 596 NR_154720.1

Readeriella ellipsoidea ITS region; from TYPE material Readeriella ... NA 2014851 462 462 93% 2e-130 85.47 544 NR_155738.1

Myrtapenidiella tenuiramis CPC 13692 ITS region; from TYPE... Myrtapenidie... NA 1431935 462 462 97% 2e-130 84.57 481 NR_145118.1

Teratosphaeria mareebensis CBS 129529 ITS region; from TYPE... Teratosphaer... NA 1050829 462 462 86% 2e-130 86.81 476 NR_156577.1

Neocatenulostroma microsporum ITS region; from TYPE material Neocatenulos... NA 1431937 462 462 81% 2e-130 87.99 481 NR_145114.1

Sphaerulina hypericii CBS 102313 ITS region; from TYPE material Sphaerulina ... NA 1358866 462 462 90% 2e-130 85.97 493 NR_147271.1

Neocatenulostroma abietis CBS 459.93 ITS region; from TYPE... Neocatenulos... NA 1434218 462 462 81% 2e-130 87.99 512 NR_145103.1

Suberoteratosphaeria suberosa CBS 436.92 ITS region; from TYPE... Suberoterato... NA 1431955 462 462 98% 2e-130 84.69 551 NR_147258.1

Nothodevriesia narthecii CBS 149066 ITS region; from TYPE... Nothodevries... NA 2949231 460 460 88% 8e-130 86.44 492 NR_182505.1

Teratosphaeria carnegiei CMW 52484 ITS region; from TYPE material Teratosphaer... NA 2972962 460 460 71% 8e-130 90.88 515 NR_182378.1

Parateratosphaeria karinae CBS 128774 ITS region; from TYPE... Parateratosp... NA 1431943 460 460 81% 8e-130 87.78 580 NR_155625.1

Penidiella aggregata CBS 128772 ITS region; from TYPE material Penidiella a... NA 1049288 460 460 81% 8e-130 87.84 645 NR_137772.1

Readeriella menaiensis ITS region; from TYPE material Readeriella ... NA 688659 459 459 93% 3e-129 85.32 591 NR_156533.1

Readeriella eucalyptigena ITS region; from TYPE material Readeriella ... NA 688222 459 459 93% 3e-129 85.32 625 NR_156532.1

Readeriella angustia ITS region; from TYPE material Readeriella ... NA 688221 459 459 86% 3e-129 86.61 637 NR_156531.1

Neobryochiton narthecii CBS 149172 ITS region; from TYPE material Neobryochito... NA 2953607 459 459 92% 3e-129 85.34 478 NR_184368.1

Readeriella patrickii CBS 124987 ITS region; from TYPE material Readeriella ... NA 688215 459 459 86% 3e-129 86.64 481 NR_156580.1

Parateratosphaeria marasasii CBS 122899 ITS region; from TYPE... Parateratosp... NA 1434224 459 459 81% 3e-129 87.81 604 NR_145095.1

Nothotrimmatostroma eucalyptorum CBS 129578 ITS region; from... Nothotrimmat... NA 2610797 457 457 98% 1e-128 84.43 538 NR_159795.1

Phaeothecoidea minutispora ITS region; from TYPE material Phaeothecoid... NA 688219 457 457 98% 1e-128 84.43 638 NR_156530.1

Myrtapenidiella balenae ITS region; from TYPE material Myrtapenidie... NA 2014841 457 457 95% 1e-128 84.70 543 NR_155413.1

Readeriella lehmannii CPC 28935 ITS region; from TYPE material Readeriella ... NA 1960857 457 457 80% 1e-128 88.06 560 NR_155734.1

Teratosphaeria syncarpiae ITS region; from TYPE material Teratosphaer... NA 665061 457 457 86% 1e-128 86.64 476 NR_147273.1

Teratosphaeria dunnii CBS 145548 ITS region; from TYPE material Teratosphaer... NA 2588910 455 455 86% 4e-128 86.64 523 NR_165577.1

Teratosphaeria verrucosa CBS 113621 ITS region; from TYPE... Teratosphaer... NA 593911 455 455 82% 4e-128 87.87 469 NR_157436.1

Cladosporium entadae MFLUCC 17-0919 ITS region; from TYPE... Cladosporium... NA 2499420 453 453 88% 1e-127 85.97 488 NR_163324.1

Readeriella tasmanica ITS region; from TYPE material Readeriella ... NA 688224 453 453 93% 1e-127 85.07 636 NR_157420.1

Cladosporium endophyticum MFLUCC 17-0599 ITS region; from TYPE... Cladosporium... NA 2259870 453 453 89% 1e-127 85.75 581 NR_158360.1

Acrodontium pigmentosum CBS 111111 ITS region; from TYPE material Acrodontium ... NA 1873233 453 453 77% 1e-127 88.54 544 NR_154721.1

Myrtapenidiella eucalypti ITS region; from TYPE material Myrtapenidie... NA 1431934 453 453 97% 1e-127 84.36 478 NR_145120.1

Penidiella columbiana CBS 486.80 ITS region; from TYPE material Penidiella c... NA 470140 453 453 82% 1e-127 87.56 478 NR_156579.1

Teratosphaeria profusa CBS 125007 ITS region; from TYPE material Teratosphaer... NA 630512 453 453 77% 1e-127 89.03 473 NR_156578.1

Alignments:

>Hortaea werneckii CBS 107.67 ITS region; from TYPE material

Sequence ID: NR_145338.1 Length: 472

Range 1: 10 to 472

Score:802 bits(434), Expect:0.0,

Identities:457/467(98%), Gaps:5/467(1%), Strand: Plus/Plus

Query 6 GAGTGTGGCGCTCCGGCGCCTCCCTCCAACCCCATGTCGAAACGACTCTGTTGCCTCGGG 65

|||||||| |||||||| ||| ||||||||||||||||||||||||||||||||||||||

Sbjct 10 GAGTGTGG-GCTCCGGC-CCTACCTCCAACCCCATGTCGAAACGACTCTGTTGCCTCGGG 67

Query 66 GGCGACCCGGCCTTCGGGCGTCGGGGCCCCCGGCGGACACCTTCATAACTCTTGCATCTC 125

||||||||||||||||||||||||||||||||| ||||||||||||||||||||||||||

Sbjct 68 GGCGACCCGGCCTTCGGGCGTCGGGGCCCCCGGTGGACACCTTCATAACTCTTGCATCTC 127

Query 126 TTGCGTCTGAGTGATACATATAATCAATCAAAACTTTCAACAACGGATCTCTTGGTTCTG 185

||||||||||||||||||||||||||||||||||||||||||||||||||||||||||||

Sbjct 128 TTGCGTCTGAGTGATACATATAATCAATCAAAACTTTCAACAACGGATCTCTTGGTTCTG 187

Query 186 GCATCGATGAAGAACGCAGCGAAATGCGATAAGTAATGTGAATTGCAGAATTCAGTGAAT 245

||||||||||||||||||||||||||||||||||||||||||||||||||||||||||||

Sbjct 188 GCATCGATGAAGAACGCAGCGAAATGCGATAAGTAATGTGAATTGCAGAATTCAGTGAAT 247

Query 246 CATCGAATCTTTGAACGCACATTGCGCCCCCTGGCATTCCGGGGGGCATGCCTGTTCGAG 305

||||||||||||||||||| || ||||||||||||||||||||||||||||||||||||

Sbjct 248 CATCGAATCTTTGAACGCAATTTACGCCCCCTGGCATTCCGGGGGGCATGCCTGTTCGAG 307

Query 306 CGTCATTACACCACTCAAGCCTGGCTTGGTATTGAGCGACCGCGGCCTGCCCGCGCGCTC 365

|||||||||||||||||||||||||||||||||||||| |||||||||||||||||||||

Sbjct 308 CGTCATTACACCACTCAAGCCTGGCTTGGTATTGAGCG-CCGCGGCCTGCCCGCGCGCTC 366

Query 366 CAATGTCTCCGGCTGAGCCGTCCGTCTCTAAGCGTTGTGAATAGCGATCGCTTGCGAGGC 425

||||||||||||||||||||||||||||||||||||||||||||||||||||||||||||

Sbjct 367 CAATGTCTCCGGCTGAGCCGTCCGTCTCTAAGCGTTGTGAATAGCGATCGCTTGCGAGGC 426

Query 426 CCGGGCGGTTCGACGCCGTTAAAcccccccATTTTCTATGGT-GACC 471

||||||||||||||||||||||| |||||||||||||||||| ||||

Sbjct 427 CCGGGCGGTTCGACGCCGTTAAA-CCCCCCATTTTCTATGGTTGACC 472

>Eupenidiella venezuelensis CBS 106.75 ITS region; from TYPE material

Sequence ID: NR_153971.1 Length: 577

Range 1: 41 to 499

Score:658 bits(356), Expect:0.0,

Identities:431/465(93%), Gaps:13/465(2%), Strand: Plus/Plus

Query 28 CCT-CCAACCCCATGTCGAAACGACTCTGTTGCCTCGGGGGCGACCCGGCCTTCGGGCGT 86

||| |||||||||||||| |||||||||||||||||||||||||||||||||||||||

Sbjct 41 CCTCCCAACCCCATGTCGTTTCGACTCTGTTGCCTCGGGGGCGACCCGGCCTTCGGGCGT 100

Query 87 CGGGGCCCCCGGCGGACACCTTCATAACTCTTGCAT-CTCTTGCGTCTGAGTGATACATA 145

||||||||||||||||| || ||| ||||| ||||| || |||||||||||| | | |||

Sbjct 101 CGGGGCCCCCGGCGGAC-CCCTCA-AACTC-TGCATGCT-TTGCGTCTGAGT-ACAGATA 155

Query 146 T-AATCAATCAAAACTTTCAACAACGGATCTCTTGGTTCTGGCATCGATGAAGAACGCAG 204

| ||||||||||||||||||||||||||||||||||||||||||||||||||||||||||

Sbjct 156 TAAATCAATCAAAACTTTCAACAACGGATCTCTTGGTTCTGGCATCGATGAAGAACGCAG 215

Query 205 CGAAATGCGATAAGTAATGTGAATTGCAGAATTCAGTGAATCATCGAATCTTTGAACGCA 264

||||||||||||||||||||||||||||||||||||||||||||||||||||||||||||

Sbjct 216 CGAAATGCGATAAGTAATGTGAATTGCAGAATTCAGTGAATCATCGAATCTTTGAACGCA 275

Query 265 CATTGCGCCCCCTGGCATTCCGGGGGGCATGCCTGTTCGAGCGTCATTACACCACTCAAG 324

||||||||||||||||||||||||||||||||||||||||||||||||||||||||||||

Sbjct 276 CATTGCGCCCCCTGGCATTCCGGGGGGCATGCCTGTTCGAGCGTCATTACACCACTCAAG 335

Query 325 CCTGGCTTGGTATTGAGCGACCGCGG-CCTGCCCGCGCGCTCCAATGTCTCCGGCTGAGC 383

||||||||||||||| ||| |||||| ||| ||||||||| | |||||||||||||||||

Sbjct 336 CCTGGCTTGGTATTGGGCGGCCGCGGTCCTCCCCGCGCGCCCTAATGTCTCCGGCTGAGC 395

Query 384 CGTCCGTCTCTAAGCGTTGTGA-ATAGC-GATCGCTTGCGAGGCCCGGGCGGTTCGACGC 441

||||||||||||||||||||| | | | | |||||||||||||||||||||||||||||

Sbjct 396 CGTCCGTCTCTAAGCGTTGTGGCACACCAGTTCGCTTGCGAGGCCCGGGCGGTTCGACGC 455

Query 442 CGTTAAAcccccccATTTTCTATGG-TGACCGCGGATCAGGTAGG 485

||||||||||| | || || | || ||||| |||||||||||||

Sbjct 456 CGTTAAACCCCTTC-TTCTCAAAGGTTGACCTCGGATCAGGTAGG 499

>Salinomyces polonicus CBS 147480 ITS region; from TYPE material

Sequence ID: NR_175161.1 Length: 522

Range 1: 18 to 498

Score:601 bits(325), Expect:5e-172,

Identities:438/490(89%), Gaps:18/490(3%), Strand: Plus/Plus

Query 5 CGAGTG-TGGCGCTC-CGGCGCCTCCCT-CCAACCCCATGTCGAAACGACTCTGTTGCCT 61

|||||| ||| ||| |||| || ||| |||||||||||||| ||||||||||||||

Sbjct 18 CGAGTGAGGGCCCTCGCGGC-CCGACCTCCCAACCCCATGTCGTTTCGACTCTGTTGCCT 76

Query 62 CGGGGGCGACCCGGCCTTCGGGCGTCGGGGCCCCCGGCGGACACCTTCATAACTCTTGCA 121

|||||||||||||||||||||||||||||||||||||||||| || ||| ||||| ||||

Sbjct 77 CGGGGGCGACCCGGCCTTCGGGCGTCGGGGCCCCCGGCGGAC-CCCTCA-AACTC-TGCA 133

Query 122 T-CTCTTGCGTCTGAGTGATACATAT-AATCAATCAAAACTTTCAACAACGGATCTCTTG 179

| || |||||||||||||||| || | ||||||| |||||||||||||||||||||||||

Sbjct 134 TGCT-TTGCGTCTGAGTGATAAATTTAAATCAATTAAAACTTTCAACAACGGATCTCTTG 192

Query 180 GTTCTGGCATCGATGAAGAACGCAGCGAAATGCGATAAGTAATGTGAATTGCAGAATTCA 239

||||||||||||||||||||||||||||||||||||||||||||||||||||||||||||

Sbjct 193 GTTCTGGCATCGATGAAGAACGCAGCGAAATGCGATAAGTAATGTGAATTGCAGAATTCA 252

Query 240 GTGAATCATCGAATCTTTGAACGCACATTGCGCCCCCTGGCATTCCGGGGGGCATGCCTG 299

||||||||||||||||||||||||||||||||||||||||||||||||||||||||||||

Sbjct 253 GTGAATCATCGAATCTTTGAACGCACATTGCGCCCCCTGGCATTCCGGGGGGCATGCCTG 312

Query 300 TTCGAGCGTCATTACACCACTCAAGCCTGGCTTGGTATTGAGCGACCGCGGCCTGCCC-G 358

|||||||||||||||||||||||||||| ||||||||||| ||| |||||| || ||| |

Sbjct 313 TTCGAGCGTCATTACACCACTCAAGCCTCGCTTGGTATTGGGCG-CCGCGGTCTCCCCCG 371

Query 359 CGCGCTCCAATGTCTCCGGCTGAGCCGTCCGTCTCTAAGCGTTGTGA-ATAGC-GATCGC 416

||||| |||||||||||||||||||||| |||||||||||||||| | | | ||||

Sbjct 372 CGCGCCTCAATGTCTCCGGCTGAGCCGTCTGTCTCTAAGCGTTGTGGCACACCTCGTCGC 431

Query 417 TTGCGAGGCCCGGG-CGGTTCGACGCCGTTAAAcccccccATTTTCTATGGTGACCGCGG 475

||| ||| | ||| ||||||||||||||||||||| | || | | | ||||| |||

Sbjct 432 TTGTGAG-CTCGGATCGGTTCGACGCCGTTAAACCCTTC--TTCTAAAGGTTGACCTCGG 488

Query 476 ATCAGGTAGG 485

||||||||||

Sbjct 489 ATCAGGTAGG 498

>Stenella araguata ITS region; from TYPE material

Sequence ID: NR_156511.1 Length: 659

Range 1: 87 to 581

Score:586 bits(317), Expect:1e-167,

Identities:443/500(89%), Gaps:24/500(4%), Strand: Plus/Plus

Query 5 CGAGTG-TGGCGCTC-CGGCGCCTCCCTCCAACCCCATGTCGAAACGACTCTGTTGCCTC 62

|||||| ||| ||| |||| || ||||||||||||||||| | |||||||||||||||

Sbjct 87 CGAGTGAGGGCCCTCGCGGC-CCGACCTCCAACCCCATGTCGTACCGACTCTGTTGCCTC 145

Query 63 GGGGGCGACCCGGCC--TTCGGGCGTCGGGGCCCCCGGCGGACACCTTCATAACTC-TTG 119

||||||||||||||| |||||||| ||||||||||||||||| |||| | ||||| |||

Sbjct 146 GGGGGCGACCCGGCCCTTTCGGGCGGCGGGGCCCCCGGCGGACCCCTTTAAAACTCTTTG 205

Query 120 CATCTCTTGCGTCTGAGTGATACATA-TAATCAATCAAAACTTTCAACAACGGATCTCTT 178

|||||||||||||||||| || ||| ||||||| ||||||||||||||||||||||||

Sbjct 206 CATCTCTTGCGTCTGAGT-ATTGATACCAATCAATTAAAACTTTCAACAACGGATCTCTT 264

Query 179 GGTTCTGGCATCGATGAAGAACGCAGCGAAATGCGATAAGTAATGTGAATTGCAGAATTC 238

||||||||||||||||||||||||||||||||||||||||||||||||||||||||||||

Sbjct 265 GGTTCTGGCATCGATGAAGAACGCAGCGAAATGCGATAAGTAATGTGAATTGCAGAATTC 324

Query 239 AGTGAATCATCGAATCTTTGAACGCACATTGCGCCCCCTGGCATTCCGGGGGGCATGCCT 298

||||||||||||||||||||||||||||||||||||||||||||||||||||||||||||

Sbjct 325 AGTGAATCATCGAATCTTTGAACGCACATTGCGCCCCCTGGCATTCCGGGGGGCATGCCT 384

Query 299 GTTCGAGCGTCATTACACCACTCAAGCCTGGCTTGGTATTGAGCGACCGCG-G----CCT 353

||||||||||||||||||||||||||||| ||||||||||||||| ||||| | |||

Sbjct 385 GTTCGAGCGTCATTACACCACTCAAGCCTCGCTTGGTATTGAGCG-CCGCGAGCGATCCT 443

Query 354 GCCCGCGCGCTCCAATGTCT-CCGGCTGAGCCGTCCGTCTCTAAGCGTTGTGAA-TAGCG 411

|||||||||||||||||||| |||||||||||||||| |||||||||||||| || |

Sbjct 444 GCCCGCGCGCTCCAATGTCTCCCGGCTGAGCCGTCCGCCTCTAAGCGTTGTGGTCTACCA 503

Query 412 AT--CGCTTGCGAGGCCCGG--GCGGTTCGACGCCGTTAAAcccccccATTTTCTAT-GG 466

| ||||||||||| ||| ||| |||||||||| | |||| | | || || ||

Sbjct 504 GTGCCGCTTGCGAGGTTCGGATGCGC-TCGACGCCGTCGA-CCCCATCTTCTTTTAAAGG 561

Query 467 -TGACCGCGGATCAGGTAGG 485

||||| |||||||||||||

Sbjct 562 TTGACCTCGGATCAGGTAGG 581

>Pseudotaeniolina globosa CBS 109889 ITS region; from TYPE material

Sequence ID: NR_136960.1 Length: 469

Range 1: 9 to 469

Score:564 bits(305), Expect:6e-161,

Identities:422/475(89%), Gaps:22/475(4%), Strand: Plus/Plus

Query 5 CGAGTG-TGGCGCTCCGGCGCCTCCCTCCAACCCCATGTCGAAACGACTCTGTTGCCTCG 63

|||||| ||| |||||| || |||||||||| ||| ||||||||||||||||

Sbjct 9 CGAGTGAAGGC-CTCCGGGCCCGACCTCCAACCCTTTGT-ATTCCGACTCTGTTGCCTCG 66

Query 64 GGGGCGACCCGGCCTTCGGGCGTCGGGGCCCCCGGCGGACACCTTCATAACTCTTGCATC 123

|||||||||||||||||||||| ||||||||||||||| | | || ||||| ||||||

Sbjct 67 GGGGCGACCCGGCCTTCGGGCG-CGGGGCCCCCGGCGGTCCAC-TC--AACTC-TGCATC 121

Query 124 TCTTGCGTCTGAGTGATACATAT-AATCAATCAAAACTTTCAACAACGGATCTCTTGGTT 182

| |||||||||||| | |||| | ||||||||||||||||||||||||||||||||||||

Sbjct 122 T-TTGCGTCTGAGT-AAACATTTGAATCAATCAAAACTTTCAACAACGGATCTCTTGGTT 179

Query 183 CTGGCATCGATGAAGAACGCAGCGAAATGCGATAAGTAATGTGAATTGCAGAATTCAGTG 242

||||||||||||||||||||||||||||||||||||||||||||||||||||||||||||

Sbjct 180 CTGGCATCGATGAAGAACGCAGCGAAATGCGATAAGTAATGTGAATTGCAGAATTCAGTG 239

Query 243 AATCATCGAATCTTTGAACGCACATTGCGCCCCCTGGCATTCCGGGGGGCATGCCTGTTC 302

|||||||||||||||||||||||||||||||| |||||||||| ||||||||||||||

Sbjct 240 AATCATCGAATCTTTGAACGCACATTGCGCCCTTTGGCATTCCGAAGGGCATGCCTGTTC 299

Query 303 GAGCGTCATTACACCACTCAAGCCTGGCTTGGTATTGAGCGACCGCGGCCTGCCCGCGCG 362

||||||||||||||||||||||||| ||||||||||| ||| |||||| | ||| |||||

Sbjct 300 GAGCGTCATTACACCACTCAAGCCTCGCTTGGTATTGGGCG-CCGCGGTCCGCC-GCGCG 357

Query 363 CTCCAATGTCTCCGGCTGAGCCGTCCGTCTCTAAGCGTTGTGAAT-AG-CGAT-CGCTTG 419

| |||||||||||||||||||||||||||||||||||||||||| | | || ||||||

Sbjct 358 CCTCAATGTCTCCGGCTGAGCCGTCCGTCTCTAAGCGTTGTGAATCAATCAATCCGCTTG 417

Query 420 CGAGGCCCGGGC-GGTT-CGACGCCGTTAAAcccccccATT-TTCTATGGTGACC 471

||||||| |||| || | || |||||||||||||||| ||| ||||| | |||||

Sbjct 418 CGAGGCC-GGGCTGGCTGCG-CGCCGTTAAACCCCCC-ATTCTTCTAGGTTGACC 469

>Salinomyces thailandica CBS 125423 ITS region; from TYPE material

Sequence ID: NR_171710.1 Length: 722

Range 1: 158 to 613

Score:562 bits(304), Expect:2e-160,

Identities:415/466(89%), Gaps:18/466(3%), Strand: Plus/Plus

Query 28 CCTCCAACCCCATGTCGAAACGACTCTGTTGCCTCGGGGGCGACCCGGCCTTCGGGCGTC 87

|||||||||| ||||| ||||||||||||||||||||||||||||||||||||||||

Sbjct 158 CCTCCAACCCTTTGTCG-TCCGACTCTGTTGCCTCGGGGGCGACCCGGCCTTCGGGCGTC 216

Query 88 GGGGCCCCCGGCGGACACCTTCATAACTCTTGCATCTCTTGCGTCTGAGTGATACATA-T 146

||||||||||| |||| || || ||||| ||||| | ||||||||||||||| |||

Sbjct 217 GGGGCCCCCGGTGGAC-CCCTC--AACTC-TGCATGCCCTGCGTCTGAGTGATAGATACA 272

Query 147 AATCAATCAAAACTTTCAACAACGGATCTCTTGGTTCTGGCATCGATGAAGAACGCAGCG 206

||||||||||||||||||||||||||||||||||||||||||||||||||||||||||||

Sbjct 273 AATCAATCAAAACTTTCAACAACGGATCTCTTGGTTCTGGCATCGATGAAGAACGCAGCG 332

Query 207 AAATGCGATAAGTAATGTGAATTGCAGAATTCAGTGAATCATCGAATCTTTGAACGCACA 266

||||||||||||||||||||||||||||||||||||||||||||||||||||||||||||

Sbjct 333 AAATGCGATAAGTAATGTGAATTGCAGAATTCAGTGAATCATCGAATCTTTGAACGCACA 392

Query 267 TTGCGCCCCCTGGCATTCCGGGGGGCATGCCTGTTCGAGCGTCATTACACCACTCAAGCC 326

|||||||||| |||| ||||||||||||||||||||||||||||||||||||||||||||

Sbjct 393 TTGCGCCCCCCGGCACTCCGGGGGGCATGCCTGTTCGAGCGTCATTACACCACTCAAGCC 452

Query 327 TGGCTTGGTATTGAGCGACCGCGG-CCTGCCCGCGCGCTCCAATGTCTCCGGCTGAGCCG 385

| ||||||||||| ||| |||||| ||| ||||||||| |||||||||||||||||||||

Sbjct 453 TCGCTTGGTATTGGGCG-CCGCGGTCCTCCCCGCGCGCCCCAATGTCTCCGGCTGAGCCG 511

Query 386 TCCGTCTC-TAAGCGTTGTGAAT-AG-CGA-TCGCTTGCGAGGCCCGGG-CGGTTCGACG 440

|||||| | | ||||||||| | | | | ||||| || ||||||| ||| ||||||

Sbjct 512 TCCGTCCCATCAGCGTTGTGGTTCAATCAACTCGCTCTCG-GGCCCGGACCGGCTCGACG 570

Query 441 CCGTTAAAcccccccATTTTCTATGG-TGACCGCGGATCAGGTAGG 485

|||| |||||| | ||| | | || ||||| |||||||||||||

Sbjct 571 CCGTCAAACCCTTC--TTT-CAAAGGTTGACCTCGGATCAGGTAGG 613

>Catenulostroma hermanusense CBS 128768 ITS region; from TYPE material

Sequence ID: NR_137065.1 Length: 656

Range 1: 175 to 629

Score:555 bits(300), Expect:4e-158,

Identities:414/466(89%), Gaps:19/466(4%), Strand: Plus/Plus

Query 28 CCTCCAACCCCATGTCGAAACGACTCTGTTGCCTCGGGGGCGACCCGGCC-TTC-GGGCG 85

||||||||||||||| |||||||||||||||||||||||||||||| ||| |||||

Sbjct 175 CCTCCAACCCCATGT-TTTCCGACTCTGTTGCCTCGGGGGCGACCCGGCCCTTCTGGGCG 233

Query 86 TCGGGGCCCCCGGCGGACACCTTCATAACTCTTGCATCTCTTGCGTCTGAGTGATACATA 145

||||||||||||| || || || ||| | ||||||| ||||||||||| | | ||

Sbjct 234 TCGGGGCCCCCGGTGG--TCCATCTCAAC-CCTGCATCT-GTGCGTCTGAGT-AAATATT 288

Query 146 T-AATCAATCAAAACTTTCAACAACGGATCTCTTGGTTCTGGCATCGATGAAGAACGCAG 204

| ||||||||||||||||||||||||||||||||||||||||||||||||||||||||||

Sbjct 289 TGAATCAATCAAAACTTTCAACAACGGATCTCTTGGTTCTGGCATCGATGAAGAACGCAG 348

Query 205 CGAAATGCGATAAGTAATGTGAATTGCAGAATTCAGTGAATCATCGAATCTTTGAACGCA 264

||||||||||||||||||||||||||||||||||||||||||||||||||||||||||||

Sbjct 349 CGAAATGCGATAAGTAATGTGAATTGCAGAATTCAGTGAATCATCGAATCTTTGAACGCA 408

Query 265 CATTGCGCCCCCTGGCATTCCGGGGGGCATGCCTGTTCGAGCGTCATTACACCACTCAAG 324

||||||||||| || ||||||||||||||||||||||||||||||||||||||||||||

Sbjct 409 CATTGCGCCCCTCGGTATTCCGGGGGGCATGCCTGTTCGAGCGTCATTACACCACTCAAG 468

Query 325 CCTGGCTTGGTATTGAGCGACCGCGGCCTGCCCGCGCGCTCCAATGTCTCCGGCTGAGCC 384

||| ||||||| ||| ||| |||||| | | |||||||| ||||||||||||||||||||

Sbjct 469 CCTCGCTTGGTCTTGGGCG-CCGCGGTCCG-CCGCGCGCCCCAATGTCTCCGGCTGAGCC 526

Query 385 GTCCGTCTCTAAGCGTTGTGAATAGC-GATCGCTTGCGAGGCCCGGGC-GGTTCGA-CGC 441

||||||||||||||||||||| | | | |||||||||||||| |||| || | | |||

Sbjct 527 GTCCGTCTCTAAGCGTTGTGATAAACTGTTCGCTTGCGAGGCC-GGGCTGGCTTGTTCGC 585

Query 442 CGTTAAAcccccccATTTTCTAT-GG-TGACCGCGGATCAGGTAGG 485

||| ||||||||| ||||| || || ||||| |||||||||||||

Sbjct 586 CGTAAAACCCCCC-ATTTT-TACAGGTTGACCTCGGATCAGGTAGG 629

>Recurvomyces mirabilis CBS 119434 ITS region; from TYPE material

Sequence ID: NR_137024.1 Length: 582

Range 1: 54 to 510

Score:553 bits(299), Expect:1e-157,

Identities:412/465(89%), Gaps:14/465(3%), Strand: Plus/Plus

Query 27 CCCTCCAACCCCATGTCGAAACGACTCTGTTGCCTCGGGGGCGACCCGGCC-T-TCGGGC 84

|||||||||||||||| |||||||||||||||||||||||||||||| | ||||||

Sbjct 54 CCCTCCAACCCCATGT-TTTCCGACTCTGTTGCCTCGGGGGCGACCCGGCCCTCTCGGGC 112

Query 85 GTCGGGGCCCCCGGCGGACACCTTCATAACTCTTGCATCTCTTGCGTCTGAGTGATACAT 144

|||||||||||||| || || || ||| | ||||||| ||||||||||| | | ||

Sbjct 113 GTCGGGGCCCCCGGTGG--TCCATCTCAAC-CCTGCATCT-GTGCGTCTGAGTCA-ATAT 167

Query 145 AT-AATCAATCAAAACTTTCAACAACGGATCTCTTGGTTCTGGCATCGATGAAGAACGCA 203

| |||||||||||||||| ||||||||||||||||||||||||||||||||||||||||

Sbjct 168 TTGAATCAATCAAAACTTTTAACAACGGATCTCTTGGTTCTGGCATCGATGAAGAACGCA 227

Query 204 GCGAAATGCGATAAGTAATGTGAATTGCAGAATTCAGTGAATCATCGAATCTTTGAACGC 263

||||||||||||||||||||||||||||||||||||||||||||||||||||||||||||

Sbjct 228 GCGAAATGCGATAAGTAATGTGAATTGCAGAATTCAGTGAATCATCGAATCTTTGAACGC 287

Query 264 ACATTGCGCCCCCTGGCATTCCGGGGGGCATGCCTGTTCGAGCGTCATTACACCACTCAA 323

|||||||||||| || |||||||||||||||||||||||||||||||||||||||||||

Sbjct 288 ACATTGCGCCCCTCGGTATTCCGGGGGGCATGCCTGTTCGAGCGTCATTACACCACTCAA 347

Query 324 GCCTGGCTTGGTATTGAGCGACCGCGG-CCTGCCCGCGCGCTCCAATGTCTCCGGCTGAG 382

|||| ||||||| ||| ||| |||||| || | |||||||| ||||||||||||||||||

Sbjct 348 GCCTCGCTTGGTCTTGGGCGTCCGCGGTCCCG-CCGCGCGCCCCAATGTCTCCGGCTGAG 406

Query 383 CCGTCCGTCTCTAAGCGTTGTGAATAGCGAT-CGCTTGCGAGGCCCGGGCGGTTCGA-CG 440

|||||||||||| |||||||||| | |||| ||||||||||||| || ||| | | ||

Sbjct 407 CCGTCCGTCTCTGAGCGTTGTGATAAACGATCCGCTTGCGAGGCCGGGCCGGCTTGTTCG 466

Query 441 CCGTTAAAcccccccATTTTCTATGGTGACCGCGGATCAGGTAGG 485

|||||||||||||| || || | | ||||| |||||||||||||

Sbjct 467 CCGTTAAACCCCCC-ATCTTACAGGTTGACCTCGGATCAGGTAGG 510

>Meristemomyces arctostaphylos ITS region; from TYPE material

Sequence ID: NR_155391.1 Length: 552

Range 1: 57 to 521

Score:545 bits(295), Expect:2e-155,

Identities:425/484(88%), Gaps:23/484(4%), Strand: Plus/Plus

Query 6 GAGTG-TGGCGCTCCGGCGCCTCCCTCCAACCCCATGTCGAAACGACTCTGTTGCCTCGG 64

||||| ||| ||||||| || |||||||||| ||| ||||| |||||||||||||||

Sbjct 57 GAGTGAGGGCCCTCCGGC-CCGACCTCCAACCCTTTGT-GAAACCACTCTGTTGCCTCGG 114

Query 65 GGGCGACCCGGCCTTCGGGCGTCGGGGCCCCCGGCGGACACCTTCATAACTCTTGCATCT 124

|||||||||||||||||||| ||||||||||| | |||| || || ||| | |||||||

Sbjct 115 GGGCGACCCGGCCTTCGGGC-TCGGGGCCCCCCGTGGAC-CC-TC--AAC-CCTGCATCT 168

Query 125 CTTGCGTCTGAGTGATACATAT-AATCAATCAAAACTTTCAACAACGGATCTCTTGGTTC 183

|||||||||||| | | || | |||||||||||||||||||||||||||||||||||||

Sbjct 169 -TTGCGTCTGAGT-ACATATTTGAATCAATCAAAACTTTCAACAACGGATCTCTTGGTTC 226

Query 184 TGGCATCGATGAAGAACGCAGCGAAATGCGATAAGTAATGTGAATTGCAGAATTCAGTGA 243

||||||||||||||||||||||||||||||||||||||||||||||||||||||||||||

Sbjct 227 TGGCATCGATGAAGAACGCAGCGAAATGCGATAAGTAATGTGAATTGCAGAATTCAGTGA 286

Query 244 ATCATCGAATCTTTGAACGCACATTGCGCCCCCTGGCATTCCGGGGGGCATGCCTGTTCG 303

||||||||||||||||||||||||||||||||||||||||||||||||||||||||||||

Sbjct 287 ATCATCGAATCTTTGAACGCACATTGCGCCCCCTGGCATTCCGGGGGGCATGCCTGTTCG 346

Query 304 AGCGTCATTACACCACTCAAGCCTGGCTTGGTATTGAGCGACCGCGGCCTGCCCGCGCGC 363

|||||||||||||||||||||||||||||||||||| ||| ||||| ||| |||||||

Sbjct 347 AGCGTCATTACACCACTCAAGCCTGGCTTGGTATTGGGCG-CCGCG-CCTCGGCGCGCGC 404

Query 364 TCCAATGTCTCCGGCTGAGCCGTCCGTCTCTAAGCGTTGTG-AATAGCGATC-GCTTGCG 421

| |||||||||||||| ||| |||||||||||||||||| ||| | ||| |||||||

Sbjct 405 CCTAATGTCTCCGGCTGGACCGCCCGTCTCTAAGCGTTGTGCAAT--CAATCCGCTTGCG 462

Query 422 AGGCCCGGGCGGTTCGACGCCGTTAAAcccccccATTTTCTATGGTGACCGCGGATCAGG 481

| || |||| || | ||||||| |||| | ||| | | | ||||| |||||||||

Sbjct 463 A-GCTCGGGGGGCGCCACGCCGTAAAACTCT---TTTTAC-AGGTTGACCTCGGATCAGG 517

Query 482 TAGG 485

||||

Sbjct 518 TAGG 521

>Haniomyces dodonaeae KUMCC 20-0220 ITS region; from TYPE material

Sequence ID: NR_172440.1 Length: 481

Range 1: 10 to 481

Score:538 bits(291), Expect:4e-153,

Identities:422/483(87%), Gaps:18/483(3%), Strand: Plus/Plus

Query 6 GAGTGTGGCGCTC-CGGCGCCTCCCTCCAACCCCATGTCGAAACGACTCTGTTGCCTCGG 64

||||| || |||| | || || |||||||||| ||| | |||||||||||||||||

Sbjct 10 GAGTGAGG-GCTCACCGC-CCAACCTCCAACCCATTGT-AATCCGACTCTGTTGCCTCGG 66

Query 65 GGGCGACCCGGCCTTCGGGCGTCGGGGCCCCCGGCGGACACCTTCATAACTCTTGCATCT 124

|||||||||||||||||||||||||||||||||| |||| | || ||||| |||||||

Sbjct 67 GGGCGACCCGGCCTTCGGGCGTCGGGGCCCCCGGTGGACCAC-TC--AACTC-TGCATCT 122

Query 125 CTTGCGTCTGAGTGATACATATAATCAATCAAAACTTTCAACAACGGATCTCTTGGTTCT 184

|||||||||||| ||| || ||| ||||||||||||||||||||||||||||||||||

Sbjct 123 -TTGCGTCTGAGTAATAAATTGAATAAATCAAAACTTTCAACAACGGATCTCTTGGTTCT 181

Query 185 GGCATCGATGAAGAACGCAGCGAAATGCGATAAGTAATGTGAATTGCAGAATTCAGTGAA 244

||||||||||||||||||||||||||||||||||||||||||||||||||||||||||||

Sbjct 182 GGCATCGATGAAGAACGCAGCGAAATGCGATAAGTAATGTGAATTGCAGAATTCAGTGAA 241

Query 245 TCATCGAATCTTTGAACGCACATTGCGCCCCCTGGCATTCCGGGGGGCATGCCTGTTCGA 304

||||||||||||||||||||||||||||||| ||| |||||| |||||||||||||||||

Sbjct 242 TCATCGAATCTTTGAACGCACATTGCGCCCCTTGGTATTCCGAGGGGCATGCCTGTTCGA 301

Query 305 GCGTCATTACACCACTCAAGCCTGGCTTGGTATTGAGCGACCGCGG-CCTGCCCGCGCGC 363

||||||||||||||||||||||| ||||||||||| ||| |||||| || |||||||||

Sbjct 302 GCGTCATTACACCACTCAAGCCTCGCTTGGTATTGGGCG-CCGCGGTCCCCCCCGCGCGC 360

Query 364 TCCAATGTCTCCGGCTGAGCCGTCCGTCTCTAAGCGTTGTGA-ATAGCGAT-C-GCTTGC 420

||||||||||||||||| |||||||||||||||||||| || | | | ||||

Sbjct 361 CTTAATGTCTCCGGCTGAGCTGTCCGTCTCTAAGCGTTGTGGCATTTTGTTTCCGCTTCG 420

Query 421 GAGGCCCGGGCGG-TTCGACGCCGTTAAAcccccccATTTTCTATGG-TGACCGCGGATC 478

||| | |||| || ||| ||||||||||||||||| || || | || ||||| ||||||

Sbjct 421 GAG-CACGGGTGGCTTCTACGCCGTTAAACCCCCC-TTTCTCAAAGGTTGACCTCGGATC 478

Query 479 AGG 481

|||

Sbjct 479 AGG 481

>Neocatenulostroma castaneae MFLUCC 17-2188 ITS region; from TYPE material

Sequence ID: NR_176757.1 Length: 488

Range 1: 45 to 484

Score:536 bits(290), Expect:1e-152,

Identities:402/453(89%), Gaps:19/453(4%), Strand: Plus/Plus

Query 6 GAGTG-TGGCGCTC-CGGCGCCTCCCTCCAACCCCATGTCGAAACGACTCTGTTGCCTCG 63

||||| ||| ||| |||| || ||||||||||||||| | |||| |||||||||||

Sbjct 45 GAGTGAGGGCCCTCGCGGC-CCGACCTCCAACCCCATGT-TATCCGACACTGTTGCCTCG 102

Query 64 GGGGCGACCCGGCCTTCGGGCGTCGGGGCCCCCGGCGGAC-ACCTTCATAACTCTTGCAT 122

||||||||||||||||||||||||||||||| ||| |||| ||| | ||||| |||||

Sbjct 103 GGGGCGACCCGGCCTTCGGGCGTCGGGGCCCTCGGTGGACCACC--C--AACTC-TGCAT 157

Query 123 CTCTTGCGTCTGAGTGATACATAT-AATCAATCAAAACTTTCAACAACGGATCTCTTGGT 181

|| |||||||||||| | || || |||||||||||||||||||||||||||||||||||

Sbjct 158 CT-TTGCGTCTGAGTAAAAC-GATGAATCAATCAAAACTTTCAACAACGGATCTCTTGGT 215

Query 182 TCTGGCATCGATGAAGAACGCAGCGAAATGCGATAAGTAATGTGAATTGCAGAATTCAGT 241

||||||||||||||||||||||||||||||||||||||||||||||||||||||||||||

Sbjct 216 TCTGGCATCGATGAAGAACGCAGCGAAATGCGATAAGTAATGTGAATTGCAGAATTCAGT 275

Query 242 GAATCATCGAATCTTTGAACGCACATTGCGCCCCCTGGCATTCCGGGGGGCATGCCTGTT 301

|||||||||||||||||||||||||||||||||| ||| |||||| ||||||||||||||

Sbjct 276 GAATCATCGAATCTTTGAACGCACATTGCGCCCCTTGGTATTCCGAGGGGCATGCCTGTT 335

Query 302 CGAGCGTCATTACACCACTCAAGCCTGGCTTGGTATTGAGCGACCGCGG-CCTGCCCGCG 360

||||||||||| |||||||||||||| ||||||||||| ||| |||||| ||| ||||||

Sbjct 336 CGAGCGTCATTTCACCACTCAAGCCTCGCTTGGTATTGGGCG-CCGCGGTCCT-CCCGCG 393

Query 361 CGCTCCAATGTCTCCGGCTGAGCCGTCCGTCTCTAAGCGTTGTGAATAGCGA-TCGCTTG 419

||| ||||||||||||||||||||||||||||||||||||||| | | | |||||||

Sbjct 394 CGCCTTAATGTCTCCGGCTGAGCCGTCCGTCTCTAAGCGTTGTGACCATCAATTCGCTTG 453

Query 420 CGAGGCCCGGGCGGTTCGACGCCGTTAAAcccc 452

|||| | | | ||||| |||||||||||||

Sbjct 454 CGAGATCGGAG-GGTTC-CGGCCGTTAAACCCC 484

>Batcheloromyces sedgefieldii CBS 112119 ITS region; from TYPE material

Sequence ID: NR_137012.1 Length: 700

Range 1: 143 to 613

Score:525 bits(284), Expect:3e-149,

Identities:426/490(87%), Gaps:28/490(5%), Strand: Plus/Plus

Query 5 CGAGTGTGGCGCTCCGGCGCCTCCCTCCAACCCCATGTCGA-AACGA-CTCTGTTGCCTC 62

|||||| || ||||||| || ||||||||||| || || || | ||||||||||||

Sbjct 143 CGAGTGAGG-GCTCCGGGCCCGACCTCCAACCCC--GT-GATTACCATCTCTGTTGCCTC 198

Query 63 GGGGGCGACCCGGCCTTCGGGCGTCGGGGCCCCCGGCGGACACCTTCATAACTCTTGCAT 122

|||||||||||||||||||||||||||||||||||||||||||| | ||| | |||||

Sbjct 199 GGGGGCGACCCGGCCTTCGGGCGTCGGGGCCCCCGGCGGACACC--C-CAAC-CCTGCAT 254

Query 123 CTCTTGCGTCTGAGTGATACATATAATC-AATCAAAACTTTCAACAACGGATCTCTTGGT 181

| | |||||| |||| | || |||| |||||||||||||||||||||||||||||||

Sbjct 255 C-CATGCGTCCGAGT-ACCGATTAAATCAAATCAAAACTTTCAACAACGGATCTCTTGGT 312

Query 182 TCTGGCATCGATGAAGAACGCAGCGAAATGCGATAAGTAATGTGAATTGCAGAATTCAGT 241

||||||||||||||||||||||||||||||||||||||||||||||||||||||||||||

Sbjct 313 TCTGGCATCGATGAAGAACGCAGCGAAATGCGATAAGTAATGTGAATTGCAGAATTCAGT 372

Query 242 GAATCATCGAATCTTTGAACGCACATTGCGCCCCCTGGCATTCCGGGGGGCATGCCTGTT 301

|||||||||||||||||||||||||||||||||||||| |||||||||||||||||||||

Sbjct 373 GAATCATCGAATCTTTGAACGCACATTGCGCCCCCTGGTATTCCGGGGGGCATGCCTGTT 432

Query 302 CGAGCGTCATTACACCACTCAAGCCTGGCTTGGTATTGAGCGACCGCGGCCTGCCCGCGC 361

|||||||||||||||||||||||||| ||||||| ||| ||| |||||||| |||||||

Sbjct 433 CGAGCGTCATTACACCACTCAAGCCTCGCTTGGTCTTGGGCG-CCGCGGCCC-CCCGCGC 490

Query 362 GCTCCAATGTCTCCGGCTGAGCCGTCC--G--TCTCTAAGCGTTGTGAATAGCGAT-CGC 416

|| ||||||||| |||||| ||| ||| | || || ||| ||||| | | || |||

Sbjct 491 GCCCCAATGTCTTCGGCTG-GCC-TCCTCGGGTCCCTC-GCGCTGTGATGAACCATTCGC 547

Query 417 TTGCGAGGCCCGGGCGGTTCGACGCCGTTAAAcccccccATTTTCTATGG-TGACCGCGG 475

|||| | |||||||||| |||||||||||||||||||||| | | || ||||| |||

Sbjct 548 GTGCG-GTCCCGGGCGGTGCGACGCCGTTAAACCCCCCCAT---CAAAGGTTGACCTCGG 603

Query 476 ATCAGGTAGG 485

||||||||||

Sbjct 604 ATCAGGTAGG 613

>Teratosphaeria agapanthi ITS region; from TYPE material

Sequence ID: NR_169894.1 Length: 643

Range 1: 169 to 582

Score:512 bits(277), Expect:2e-145,

Identities:380/427(89%), Gaps:18/427(4%), Strand: Plus/Plus

Query 28 CCTCCAACCCCATGTCGAAACG-ACTCTGTTGCCTCGGGGGCGACCCGGCCTTCGGGCGT 86

||||||||||||||| | || || ||||||||||||||||||||||||| | ||||

Sbjct 169 CCTCCAACCCCATGT-ATACCGTACCGTGTTGCCTCGGGGGCGACCCGGCCT-C-CGCGT 225

Query 87 CGGGGCCCCCGGCGGACACCTTCATAACTCTTGCATCTCTTGCGTCTGAGTGATACATAT 146

||||||||||||||||| || ||| ||||| |||||||| ||||||||||| || ||

Sbjct 226 CGGGGCCCCCGGCGGAC-CCCTCA-AACTC-TGCATCTC-TGCGTCTGAGTAATGAATTG 281

Query 147 AATCAATCAAAACTTTCAACAACGGATCTCTTGGTTCTGGCATCGATGAAGAACGCAGCG 206

||||||||||||||||||||||||||||||||||||||||||||||||||||||||||||

Sbjct 282 AATCAATCAAAACTTTCAACAACGGATCTCTTGGTTCTGGCATCGATGAAGAACGCAGCG 341

Query 207 AAATGCGATAAGTAATGTGAATTGCAGAATTCAGTGAATCATCGAATCTTTGAACGCACA 266

||||||||||||||||||||||||||||||||||||||||||||||||||||||||||||

Sbjct 342 AAATGCGATAAGTAATGTGAATTGCAGAATTCAGTGAATCATCGAATCTTTGAACGCACA 401

Query 267 TTGCGCCCCCTGGCATTCCGGGGGGCATGCCTGTTCGAGCGTCATTACACCACTCAAGCC 326

||||||||| ||| | ||||||||||||||||||||||||||||||||||||||||||||

Sbjct 402 TTGCGCCCCTTGGTACTCCGGGGGGCATGCCTGTTCGAGCGTCATTACACCACTCAAGCC 461

Query 327 TGGCTTGGTATTGAGCGACCGCGGCCTGCCCGCGCGCTCCAATGTCTCCGGCTGAGCCGT 386

| ||||||||||| ||| ||||||||| || ||| || |||||||||||| |||||

Sbjct 462 TCGCTTGGTATTGGGCG-CCGCGGCCT-CC-GCGTGCCTTAATGTCTCCGGCCGAGCCTA 518

Query 387 CCGTCTCTAAGCGTTGTG-AATAGCGAT--CGCTTGCGAGGCCCGGGCGGT-TCGACGCC 442

|||||||||||||||||| |||| | | |||||||| || |||| ||| ||| ||||

Sbjct 519 CCGTCTCTAAGCGTTGTGGAATA-CATTTTCGCTTGCG-GGATCGGGAGGTGTCG-CGCC 575

Query 443 GTTAAAc 449

|||||||

Sbjct 576 GTTAAAC 582

>Neophaeothecoidea proteae CBS 114129 ITS region; from TYPE material

Sequence ID: NR_157417.1 Length: 708

Range 1: 144 to 621

Score:508 bits(275), Expect:3e-144,

Identities:426/494(86%), Gaps:30/494(6%), Strand: Plus/Plus

Query 6 GAGTGTGGCGCTCCGGCGCCTCCCTCCAACCCCATGTCGAAACGACTCTGTTGCCTCGGG 65

||||| || |||||| || |||||||||| ||| | ||||||||||||||||||

Sbjct 144 GAGTGAGGGCCTCCGGGTCCGACCTCCAACCCTTTGT-AACCCGACTCTGTTGCCTCGGG 202

Query 66 GGCGACCCG---GCCTTCGGGCGTCGGGGCCCCCGGCGGACACCTTCATAACTCTTGCAT 122

||||||||| |||||||||||| ||||||||||| |||| | || ||||| |||||

Sbjct 203 GGCGACCCGGCCGCCTTCGGGCGTTGGGGCCCCCGGTGGAC--C-ACACAACTC-TGCAT 258

Query 123 CTCTTGCGTCTGAG--TGATACATATAATCAATCAAAACTTTCAACAACGGATCTCTTGG 180

|| ||||||||||| ||||| || ||| ||||||||||||||||||||||||||||||

Sbjct 259 CT-TTGCGTCTGAGTCTGATATTTA-AATAAATCAAAACTTTCAACAACGGATCTCTTGG 316

Query 181 TTCTGGCATCGATGAAGAACGCAGCGAAATGCGATAAGTAATGTGAATTGCAGAATTCAG 240

||||||||||||||||||||||||||||||||||||||||||||||||||||||||||||

Sbjct 317 TTCTGGCATCGATGAAGAACGCAGCGAAATGCGATAAGTAATGTGAATTGCAGAATTCAG 376

Query 241 TGAATCATCGAATCTTTGAACGCACATTGCGCCCCCTGGCATTCCGGGGGGCATGCCTGT 300

||||||||||||||||||||||||||||||||||||||| ||||||||||||||||||||

Sbjct 377 TGAATCATCGAATCTTTGAACGCACATTGCGCCCCCTGGTATTCCGGGGGGCATGCCTGT 436

Query 301 TCGAGCGTCATTACACCACTCAAGCCTGGCTTGGTATTGAGCGACCGCGGCCTGCCCGCG 360

||||||||||||||||||||||||||||||||||||||| ||| ||||| || | ||||

Sbjct 437 TCGAGCGTCATTACACCACTCAAGCCTGGCTTGGTATTGGGCG-CCGCGCCC-GTTCGCG 494

Query 361 CGCTCCAATG-TCTCCGGCTGAGCCGTCCGTCTCTAAGCGTTGTGA-A-T--AGCGAT-C 414

||| ||||| ||||||||||||||||||||||| |||||||||| | | | | |

Sbjct 495 CGCCTCAATGTTCTCCGGCTGAGCCGTCCGTCTCCAAGCGTTGTGGCACTTTTATGTTTC 554

Query 415 -GCTTGCGAGGCCCGGGCGGTTCGACGCCGTTAAAcccccccATTTTCT-ATGG-TGACC 471

|||| || ||| |||| |||||| |||||||||||| |||||| | || |||||

Sbjct 555 CGCTT-CGGGGCACGGGGGGTTCG-CGCCGTTAAACC-----ATTTTCACAAGGTTGACC 607

Query 472 GCGGATCAGGTAGG 485

|||||||||||||

Sbjct 608 TCGGATCAGGTAGG 621

>Lapidomyces hispanicus CBS 118355 ITS region; from TYPE material

Sequence ID: NR_144960.1 Length: 466

Range 1: 8 to 397

Score:507 bits(274), Expect:1e-143,

Identities:362/402(90%), Gaps:15/402(3%), Strand: Plus/Plus

Query 6 GAGTGTGGCGCTCCGGCGCCTCCCTCCAACCCCATGTCGAAACGACTCTGTTGCCTCGGG 65

||||| || | | |||| || ||||||||||||||| ||||||||||||||||||

Sbjct 8 GAGTGAGG-GTTTCGGC-CCGACCTCCAACCCCATGT-ATTCCGACTCTGTTGCCTCGGG 64

Query 66 GGCGACCCGGCCTTCGGGCGTCGGGGCCCCCGGCGGACACCTTCATAACTCTTGCATCTC 125

|||||||| |||||||||||| ||||||||||| ||||||| ||||| | |||||||

Sbjct 65 GGCGACCCTGCCTTCGGGCGTTGGGGCCCCCGGTGGACACC---ATAACAC-TGCATCT- 119

Query 126 TTGCGTCTGAGTGATACA-TAT-AA-TCAATCAAAACTTTCAACAACGGATCTCTTGGTT 182

|||||||||||| | ||| | | || | ||||||||||||||||||||||||||||||||

Sbjct 120 TTGCGTCTGAGT-A-ACACTTTGAATTAAATCAAAACTTTCAACAACGGATCTCTTGGTT 177

Query 183 CTGGCATCGATGAAGAACGCAGCGAAATGCGATAAGTAATGTGAATTGCAGAATTCAGTG 242

||||||||||||||||||||||||||||||||||||||||||||||||||||||||||||

Sbjct 178 CTGGCATCGATGAAGAACGCAGCGAAATGCGATAAGTAATGTGAATTGCAGAATTCAGTG 237

Query 243 AATCATCGAATCTTTGAACGCACATTGCGCCCCCTGGCATTCCGGGGGGCATGCCTGTTC 302

||||||||||||||||||||||||||||||||||||| ||||||||||||||||||||||

Sbjct 238 AATCATCGAATCTTTGAACGCACATTGCGCCCCCTGGTATTCCGGGGGGCATGCCTGTTC 297

Query 303 GAGCGTCATTACACCACTCAAGCCTGGCTTGGTATTGAGCGACCGCGGCCTGCCCGCGCG 362

||||||||||||||||||||||||| ||||||||||| ||| ||||| | | ||||||

Sbjct 298 GAGCGTCATTACACCACTCAAGCCTCGCTTGGTATTGGGCG-CCGCG-CTTCGGCGCGCG 355

Query 363 CTCCAATGTCTCCGGCTGAGCCGTCCGTCTCTAAGCGTTGTG 404

| |||||| ||||||||||||||||||||||||||||||||

Sbjct 356 CCTCAATGTATCCGGCTGAGCCGTCCGTCTCTAAGCGTTGTG 397

>Lapidomyces epipinicola KRAM F-59827 ITS region; from TYPE material

Sequence ID: NR_191225.1 Length: 527

Range 1: 34 to 507

Score:505 bits(273), Expect:4e-143,

Identities:424/492(86%), Gaps:30/492(6%), Strand: Plus/Plus

Query 6 GAGTGTGGCGCTCCGGCGCCTC--CCTCCAACCCCATGTCGAAACGACTCTGTTGCCTCG 63

||||| || |||||| | ||| ||||||||||||||| ||||||||||||||||

Sbjct 34 GAGTGAGGGCCTCCGG-G-CTCGACCTCCAACCCCATGT-ATTCCGACTCTGTTGCCTCG 90

Query 64 GGGGCGACCCGGCCTTCGGGCGTCGGGGCCCCCGGCGGACACCTTCATAACTCTTGCATC 123

|||||||||| |||||||||||| ||||||||||| |||| | || ||||| ||||||

Sbjct 91 GGGGCGACCCTGCCTTCGGGCGTTGGGGCCCCCGGTGGAC--C-ACACAACTC-TGCATC 146

Query 124 TCTTGCGTCTGAGTGATACA-TAT-AA-TCAATCAAAACTTTCAACAACGGATCTCTTGG 180

| |||||||||||| | ||| | | || | ||||||||||||||||||||||||||||||

Sbjct 147 T-TTGCGTCTGAGT-A-ACACTTTGAATTAAATCAAAACTTTCAACAACGGATCTCTTGG 203

Query 181 TTCTGGCATCGATGAAGAACGCAGCGAAATGCGATAAGTAATGTGAATTGCAGAATTCAG 240

||||||||||||||||||||||||||||||||||||||||||||||||||||||||||||

Sbjct 204 TTCTGGCATCGATGAAGAACGCAGCGAAATGCGATAAGTAATGTGAATTGCAGAATTCAG 263

Query 241 TGAATCATCGAATCTTTGAACGCACATTGCGCCCCCTGGCATTCCGGGGGGCATGCCTGT 300

||||||||||||||||||||||||||||||||||||||| ||||||||||||||||||||

Sbjct 264 TGAATCATCGAATCTTTGAACGCACATTGCGCCCCCTGGTATTCCGGGGGGCATGCCTGT 323

Query 301 TCGAGCGTCATTACACCACTCAAGCCTGGCTTGGTATTGAGCGACCGCGGCCTGCCCGCG 360

||||||||||||||||||||||||||| ||||||||||| ||| ||||| | | ||||

Sbjct 324 TCGAGCGTCATTACACCACTCAAGCCTCGCTTGGTATTGGGCG-CCGCG-CTTCGGCGCG 381

Query 361 CGCTCCAATGTCTCCGGCTGAGCCGTCCGTCTCTAAGCGTTGTGA-A-T-AGCGAT-C-G 415

||| |||||| |||||||||| || |||||||||||||||||| | | | | | |

Sbjct 382 CGCCTCAATGTATCCGGCTGAGTCGACCGTCTCTAAGCGTTGTGGCACTTTATGTTTCCG 441

Query 416 CTTGCGAGGCCCGGGCGGT-TCGACGCCGTTAAAcccccccATTTTCTATGG-TGACCGC 473

|||| ||| | |||| ||| ||| ||||||||||| |||| || | | || ||||| |

Sbjct 442 CTTGTGAG-CTCGGGAGGTCTCG-CGCCGTTAAACACCCC-AT---CAAAGGTTGACCTC 495

Query 474 GGATCAGGTAGG 485

||||||||||||

Sbjct 496 GGATCAGGTAGG 507

>Meristemomyces frigidus CCFEE 5508 ITS region; from TYPE material

Sequence ID: NR_144973.1 Length: 466

Range 1: 30 to 396

Score:505 bits(273), Expect:4e-143,

Identities:345/378(91%), Gaps:12/378(3%), Strand: Plus/Plus

Query 28 CCTCCAACCCCATGTCGAAACGACTCTGTTGCCTCGGGGGCGACCCGGCCTTCGGGCGTC 87

|||||||||| |||| | ||||||||||||||||||||||||||||||||||||||||

Sbjct 30 CCTCCAACCCTTTGTC-ACCCGACTCTGTTGCCTCGGGGGCGACCCGGCCTTCGGGCGTC 88

Query 88 GGGGCCCCCGGCGGACACCTTCATAACTCTTGCATCTCTTGCGTCTGAGTGATACATAT- 146

|||||||||||||||||| |||| | ||||||| ||||||| |||| | |||| |

Sbjct 89 GGGGCCCCCGGCGGACAC----GTAAC-CCTGCATCT-TTGCGTCCGAGT-AAACATTTG 141

Query 147 AATCAATCAAAACTTTCAACAACGGATCTCTTGGTTCTGGCATCGATGAAGAACGCAGCG 206

|||||||||||||||| |||||||||||||||||||||||||||||||||||||||||||

Sbjct 142 AATCAATCAAAACTTTTAACAACGGATCTCTTGGTTCTGGCATCGATGAAGAACGCAGCG 201

Query 207 AAATGCGATAAGTAATGTGAATTGCAGAATTCAGTGAATCATCGAATCTTTGAACGCACA 266

||||||||||||||||||||||||||||||||||||||||||||||||||||||||||||

Sbjct 202 AAATGCGATAAGTAATGTGAATTGCAGAATTCAGTGAATCATCGAATCTTTGAACGCACA 261

Query 267 TTGCGCCCCCTGGCATTCCGGGGGGCATGCCTGTTCGAGCGTCATTACACCACTCAAGCC 326

|||||||| |||||||||| ||||||||||||||||||||||||||||||||||||||

Sbjct 262 TTGCGCCCTTTGGCATTCCGAAGGGCATGCCTGTTCGAGCGTCATTACACCACTCAAGCC 321

Query 327 TGGCTTGGTATTGAGCGACCGCGGCCTGCCCGCGCGCTCCAATGTCTCCGGCTGAGCCGT 386

||||||||||||| ||| ||||| ||| ||||||| |||||||||||||| ||| |||

Sbjct 322 TGGCTTGGTATTGGGCG-CCGCG-CCTCGGCGCGCGCCCCAATGTCTCCGGCCGAG-CGT 378

Query 387 CCGTCTCTAAGCGTTGTG 404

||||||| ||||||||||

Sbjct 379 CCGTCTCCAAGCGTTGTG 396

>Teratosphaeria combreti CBS 146985 ITS region; from TYPE material

Sequence ID: NR_173053.1 Length: 532

Range 1: 57 to 503

Score:503 bits(272), Expect:1e-142,

Identities:404/464(87%), Gaps:23/464(4%), Strand: Plus/Plus

Query 28 CCTCCAACCCCATGTCGA-AACGACTCTGTTGCCTCGGGGGCGACCCGGCCTTCGGGCGT 86

||||||||||||||| | || || |||||||||||||||||||||||||| |||

Sbjct 57 CCTCCAACCCCATGTATATCAC-ACCATGTTGCCTCGGGGGCGACCCGGCCTT--TGCGC 113

Query 87 CGGGGCCCCCGGCGGACACCTTCATAACTCTTGCATCTCTTGCGTCTGAGTGATACATAT 146

||||||||||||||||| | | ||||| ||||||| |||||||||||| | ||

Sbjct 114 CGGGGCCCCCGGCGGAC--CAGC-CAACTC-TGCATCT-TTGCGTCTGAGTATTGAATTG 168

Query 147 AATCAATCAAAACTTTCAACAACGGATCTCTTGGTTCTGGCATCGATGAAGAACGCAGCG 206

||||||||||||||||||||||||||||||||||||||||||||||||||||||||||||

Sbjct 169 AATCAATCAAAACTTTCAACAACGGATCTCTTGGTTCTGGCATCGATGAAGAACGCAGCG 228

Query 207 AAATGCGATAAGTAATGTGAATTGCAGAATTCAGTGAATCATCGAATCTTTGAACGCACA 266

||||||||||||||||||||||||||||||||||||||||||||||||||||||||||||

Sbjct 229 AAATGCGATAAGTAATGTGAATTGCAGAATTCAGTGAATCATCGAATCTTTGAACGCACA 288

Query 267 TTGCGCCCCCTGGCATTCCGGGGGGCATGCCTGTTCGAGCGTCATTACACCACTCAAGCC 326

||||||||||||| ||||||||||||||||||||||||||||||||||||||||||||||

Sbjct 289 TTGCGCCCCCTGGTATTCCGGGGGGCATGCCTGTTCGAGCGTCATTACACCACTCAAGCC 348

Query 327 TGGCTTGGTATTGAGCGACCGCGGCCTGCCCGCGCGCTCCAATGTCTCCGGCTGAGCCGT 386

| ||||||||||| ||| ||||||||| || |||||| ||||||||||||| |||||

Sbjct 349 TCGCTTGGTATTGGGCG-CCGCGGCCT-CC-GCGCGCCTCAATGTCTCCGGCCGAGCCTA 405

Query 387 CCGTCTCTAAGCGTTGTG-AATAGCGAT--CGCTTGCGAGGCCCGGGCGGT-TCGACGCC 442

|||||||||||||||||| |||| | | |||||||| || |||| ||| ||| ||||

Sbjct 406 CCGTCTCTAAGCGTTGTGGAATA-CATTGTCGCTTGCG-GGATCGGGAGGTGTCG-CGCC 462

Query 443 GTTAAAcccccccATTTTCTATGG-TGACCGCGGATCAGGTAGG 485

| ||||| || || | | || ||||| |||||||||||||

Sbjct 463 GCTAAACATCCACAC---CAAAGGTTGACCTCGGATCAGGTAGG 503

>Lapidomyces aloidendricola CBS 146968 ITS region; from TYPE material

Sequence ID: NR_173048.1 Length: 546

Range 1: 43 to 516

Score:499 bits(270), Expect:2e-141,

Identities:423/492(86%), Gaps:30/492(6%), Strand: Plus/Plus

Query 6 GAGTG-TGGCGCTCCGGCGCCTCCCTCCAACCCCATGTCGAAAC-GACTCTGTTGCCTCG 63

||||| ||| ||||||| || |||||||||| ||| | | |||||||||||||||

Sbjct 43 GAGTGAGGGCCCTCCGGC-CCGACCTCCAACCCTTTGT--ATTCTGACTCTGTTGCCTCG 99

Query 64 GGGGCGACCCGGCCTTCGGGCGTCGGGGCCCCCGGCGGACACCTTCATAACTCTTGCATC 123

|||||||||| |||||||||||| ||||||||||| |||| | | ||||| ||||||

Sbjct 100 GGGGCGACCCTGCCTTCGGGCGTTGGGGCCCCCGGTGGAC--TAT-ACAACTC-TGCATC 155

Query 124 TCTTGCGTCTGAGTGATACA-TAT-AA-TCAATCAAAACTTTCAACAACGGATCTCTTGG 180

| |||||||||||| | ||| | | || | ||||||||||||||||||||||||||||||

Sbjct 156 T-TTGCGTCTGAGT-A-ACATTTTGAATTAAATCAAAACTTTCAACAACGGATCTCTTGG 212

Query 181 TTCTGGCATCGATGAAGAACGCAGCGAAATGCGATAAGTAATGTGAATTGCAGAATTCAG 240

||||||||||||||||||||||||||||||||||||||||||||||||||||||||||||

Sbjct 213 TTCTGGCATCGATGAAGAACGCAGCGAAATGCGATAAGTAATGTGAATTGCAGAATTCAG 272

Query 241 TGAATCATCGAATCTTTGAACGCACATTGCGCCCCCTGGCATTCCGGGGGGCATGCCTGT 300

||||||||||||||||||||||||||||||||||||||| ||||||||||||||||||||

Sbjct 273 TGAATCATCGAATCTTTGAACGCACATTGCGCCCCCTGGTATTCCGGGGGGCATGCCTGT 332

Query 301 TCGAGCGTCATTACACCACTCAAGCCTGGCTTGGTATTGAGCGACCGCGGCCTGCCCGCG 360

||||||||||||||||||||||||||| ||||||||||| ||| ||||| | | ||||

Sbjct 333 TCGAGCGTCATTACACCACTCAAGCCTCGCTTGGTATTGGGCG-CCGCG-CTTCGGCGCG 390

Query 361 CGCTCCAATGTCTCCGGCTGAGCCGTCCGTCTCTAAGCGTTGTGA-A-T-AGCGAT-C-G 415

||| |||||| |||||||||||||||||||||||||||||||| | | | | | |

Sbjct 391 CGCCTCAATGTATCCGGCTGAGCCGTCCGTCTCTAAGCGTTGTGGCACTTTATGTTTCCG 450

Query 416 CTTGCGAGGCCCGGGCGGT-TCGACGCCGTTAAAcccccccATTTTCTATGG-TGACCGC 473

||| ||| | |||| ||| ||| ||||||||||| |||| || | | || ||||| |

Sbjct 451 CTTCGGAG-CTCGGGAGGTCTCG-CGCCGTTAAACACCCC-AT---CAAAGGTTGACCTC 504

Query 474 GGATCAGGTAGG 485

||||||||||||

Sbjct 505 GGATCAGGTAGG 516

>Penidiellopsis ramosus CBMAI 1937 ITS region; from TYPE material

Sequence ID: NR_164384.1 Length: 688

Range 1: 159 to 610

Score:497 bits(269), Expect:6e-141,

Identities:406/468(87%), Gaps:26/468(5%), Strand: Plus/Plus

Query 28 CCTCCAACCCCATGTCGAAAC-GACTCTGTTGCCTCGGGGGCGACCCGGCC--TTCGGGC 84

||||||||||||||| || | || |||||||||||||||||||||||| || ||||

Sbjct 159 CCTCCAACCCCATGT-AAATCATACCATGTTGCCTCGGGGGCGACCCGGCCCTTTTGGGC 217

Query 85 GTCGGGGCCCCCGGCGGACACCTTCATAACTCTTGCATCTCTTGCGTCTGAGTGATACAT 144

|||||||||||||| |||| | |||||| | ||||||| |||||||||||||| ||

Sbjct 218 GTCGGGGCCCCCGGTGGAC--C--CATAACAC-TGCATCT-GTGCGTCTGAGTGATTAAT 271

Query 145 ATAATCAATCAAAACTTTCAACAACGGATCTCTTGGTTCTGGCATCGATGAAGAACGCAG 204

||||||| ||||||||||||||||||||||||||||||||||||||||||||||||||

Sbjct 272 -CAATCAATTAAAACTTTCAACAACGGATCTCTTGGTTCTGGCATCGATGAAGAACGCAG 330

Query 205 CGAAATGCGATAAGTAATGTGAATTGCAGAATTCAGTGAATCATCGAATCTTTGAACGCA 264

||||||||||||||||||||||||||||||||||||||||||||||||||||||||||||

Sbjct 331 CGAAATGCGATAAGTAATGTGAATTGCAGAATTCAGTGAATCATCGAATCTTTGAACGCA 390

Query 265 CATTGCGCCCCCTGGCATTCCGGGGGGCATGCCTGTTCGAGCGTCATTACACCACTCAAG 324

||||||||||| || ||||||||||||||||||||||||||||||||||||||||||||

Sbjct 391 CATTGCGCCCCTCGGTATTCCGGGGGGCATGCCTGTTCGAGCGTCATTACACCACTCAAG 450

Query 325 CCTGGCTTGGTATTGAGCGACCGCGG-CCTGCCCGCGCGCTCCAATGTCTCCGGCTGAGC 383

||||||||||||||| || ||||||| || | |||||||||| |||||||||||||||||

Sbjct 451 CCTGGCTTGGTATTGGGC-ACCGCGGTCCCG-CCGCGCGCTCTAATGTCTCCGGCTGAGC 508

Query 384 CGTCCGT-CTCTAAGCGTTGTGA--ATAGCGATC-GCTTGCGAGGCCCGGGCGGTTCGAC 439

|||| || ||| | |||||||| ||| | ||| ||| || ||| | | ||||| |

Sbjct 509 CGTCTGTTCTCCA-GCGTTGTGGTCATATC-ATCCGCT-GCCAGGACACGATGGTTCATC 565

Query 440 GCCGTTAAAcccccccATTTTCT-ATGG-TGACCGCGGATCAGGTAGG 485

||||||||| || |||||| | || ||||| |||||||||||||

Sbjct 566 GCCGTTAAATCCTT---TTTTCTTAAGGTTGACCTCGGATCAGGTAGG 610

>Teratosphaericola leucadendri CBS 146993 ITS region; from TYPE material

Sequence ID: NR_173039.1 Length: 539

Range 1: 43 to 515

Score:497 bits(269), Expect:6e-141,

Identities:421/490(86%), Gaps:27/490(5%), Strand: Plus/Plus

Query 6 GAGTGTGGCGCT-CCGGCGCCTCCCTCCAACCCCATGTCGAAAC--GACTCTGTTGCCTC 62

||||| || ||| ||||| || |||||||||| ||| ||| | ||| |||||||||

Sbjct 43 GAGTGAGG-GCTCCCGGC-CCGACCTCCAACCCTTTGT-GAATCGTGACCATGTTGCCTC 99

Query 63 GGGGGCGACCCGGCCTTCGGGCGTCGGGGCCCCCGGCGGACACCTTCATAACTCTTGCAT 122

||||||||||||||||||||||||||||||||||||||||| | || ||||| |||||

Sbjct 100 GGGGGCGACCCGGCCTTCGGGCGTCGGGGCCCCCGGCGGACCAC-TC--AACTC-TGCAT 155

Query 123 CTCTTGCGTCTGAG--TGATACATATAATCAATCAAAACTTTCAACAACGGATCTCTTGG 180

||| |||||||||| ||| | ||| ||||||||||||||||||||||||||||||||||

Sbjct 156 CTC-TGCGTCTGAGTCTGA-ATATA-AATCAATCAAAACTTTCAACAACGGATCTCTTGG 212

Query 181 TTCTGGCATCGATGAAGAACGCAGCGAAATGCGATAAGTAATGTGAATTGCAGAATTCAG 240

||||||||||||||||||||||||||||||||||||||||||||||||||||||||||||

Sbjct 213 TTCTGGCATCGATGAAGAACGCAGCGAAATGCGATAAGTAATGTGAATTGCAGAATTCAG 272

Query 241 TGAATCATCGAATCTTTGAACGCACATTGCGCCCCCTGGCATTCCGGGGGGCATGCCTGT 300

||||||||||||||||||||||||||||||||||| ||| ||||||||||||||||||||

Sbjct 273 TGAATCATCGAATCTTTGAACGCACATTGCGCCCCTTGGTATTCCGGGGGGCATGCCTGT 332

Query 301 TCGAGCGTCATTACACCACTCAAGCCTGGCTTGGTATTGAGCGACCGCGGCCTGCCCGCG 360

||||||||||||||||||||||||||||||||||||||| ||| | |||||| ||| |||

Sbjct 333 TCGAGCGTCATTACACCACTCAAGCCTGGCTTGGTATTGGGCGTC-GCGGCC-GCC-GCG 389

Query 361 CGCTCCAATGTCTCCGGCTGAGCCGTCCGTCTCTAAGCGTTGTGA-ATAG-CGATC-GCT 417

||| ||| ||||||||||| | | | | ||| ||||||||||| | | | ||| |||

Sbjct 390 CGCCTCAAAGTCTCCGGCTGGGTCTTTCACCTCAAAGCGTTGTGACACAATCTATCCGCT 449

Query 418 T-GCGAGGCCCGGGCGGTTCGACGCCGTTAAAcccccccATTTTCTATGG-TGACCGCGG 475

| ||||| | ||| || | ||||||||||| || |||| || ||||| |||

Sbjct 450 TTGCGAG-CGTGGGGGGCCTG-CGCCGTTAAACAGTT--TTTATCTAAGGTTGACCTCGG 505

Query 476 ATCAGGTAGG 485

||||||||||

Sbjct 506 ATCAGGTAGG 515

>Catenulostroma lignicola CBS 130285 ITS region; from TYPE material

Sequence ID: NR_154848.1 Length: 595

Range 1: 102 to 541

Score:496 bits(268), Expect:2e-140,

Identities:391/449(87%), Gaps:14/449(3%), Strand: Plus/Plus

Query 5 CGAGTGTGGCGCTCCGGCGCCTCCCTCCAACCCCATGTCGAAACGACTCTGTTGCCTCGG 64

|||||| || |||||| || ||||| ||||||||| |||| ||||||||||||

Sbjct 102 CGAGTGAGGGCCTCCGGGTCCGACCTCCCACCCCATGTTACTCCGACCCTGTTGCCTCGG 161

Query 65 GGGCGACCCGGCCTTCGGGCGTCG-GGGCCCCCGGCGGACACCTTCATAACTCTTGCATC 123

||| ||||||||||||||||| || ||||||||||||||| || | ||| | ||||||

Sbjct 162 GGGTGACCCGGCCTTCGGGCG-CGCGGGCCCCCGGCGGACCACTCAAAAACAC-TGCATC 219

Query 124 TCTTGCGTCTGAGTGATACATATAATCAATCAAAACTTTCAACAACGGATCTCTTGGTTC 183

| | ||||| |||| | | || |||||||||||||||||||||||||||||||||||||

Sbjct 220 T-TCGCGTCCGAGT-AGATATTGAATCAATCAAAACTTTCAACAACGGATCTCTTGGTTC 277

Query 184 TGGCATCGATGAAGAACGCAGCGAAATGCGATAAGTAATGTGAATTGCAGAATTCAGTGA 243

||||||||||||||||||||||||||||||||||||||||||||||||||||||||||||

Sbjct 278 TGGCATCGATGAAGAACGCAGCGAAATGCGATAAGTAATGTGAATTGCAGAATTCAGTGA 337

Query 244 ATCATCGAATCTTTGAACGCACATTGCGCCCCCTGGCATTCCGGGGGGCATGCCTGTTCG 303

||||||||||||||||||||||||||||||| ||| |||||| |||||||||||||||

Sbjct 338 ATCATCGAATCTTTGAACGCACATTGCGCCCTTTGGTATTCCGAAGGGCATGCCTGTTCG 397

Query 304 AGCGTCATTACACCACTCAAGCCTGGCTTGGTATTGAGCGACCGCGG-CCTGCCCGCGCG 362

||||||||| |||||||||||||||||||||||||| ||| |||||| ||| |||||||

Sbjct 398 AGCGTCATTTCACCACTCAAGCCTGGCTTGGTATTGGGCG-CCGCGGTCCT--CCGCGCG 454

Query 363 CTCCAATGTCTCCGGCTGAGCCGTCCGTCTCTAAGCGTTGTGA-ATAGCGA-TCGCTTGC 420

| ||||||||| |||| ||||||||||||||||||||||||| || | ||||||||

Sbjct 455 CCCCAATGTCTTCGGCCGAGCCGTCCGTCTCTAAGCGTTGTGGCATTTTCATTCGCTTGC 514

Query 421 GAGGCCCGG-GCGGTTCGACGCCGTTAAA 448

|||||| || ||| |||| |||||| |||

Sbjct 515 GAGGCCGGGTGCG-TTCG-CGCCGTCAAA 541

>Constantinomyces nebulosus CBS 117941 ITS region; from TYPE material

Sequence ID: NR_156201.1 Length: 464

Range 1: 15 to 450

Score:496 bits(268), Expect:2e-140,

Identities:391/448(87%), Gaps:17/448(3%), Strand: Plus/Plus

Query 12 GGCGCTCCGGCGCCTCCCTC-CAACCCCATGTCGAAACGACTCTGTTGCCTCGGGGGCGA 70

||| |||||| || |||| |||||||||||| | |||| ||||||||||||||||||

Sbjct 15 GGC-CTCCGGGCCCGACCTCTCAACCCCATGTC-ACCCGACACTGTTGCCTCGGGGGCGA 72

Query 71 CCCGGCCTTCGGGCGTCGGGGCCCCCGGCGGACACCTTCATAACTCTTGCATCTCTTGCG 130

||||||| || |||| |||||||||||| |||| || ||| | ||||||| ||||

Sbjct 73 CCCGGCCCTCCGGCGCCGGGGCCCCCGGTGGAC--TGTC-CAACGC-TGCATCT-GTGCG 127

Query 131 TCTGAGTGATAC-ATATAATCAATCAAAACTTTCAACAACGGATCTCTTGGTTCTGGCAT 189

|| |||| |||| ||| |||||||||||||||||||||||||||||||||||||||||||

Sbjct 128 TCCGAGTCATACGATA-AATCAATCAAAACTTTCAACAACGGATCTCTTGGTTCTGGCAT 186

Query 190 CGATGAAGAACGCAGCGAAATGCGATAAGTAATGTGAATTGCAGAATTCAGTGAATCATC 249

||||||||||||||||||||||||||||||||||||||||||||||||||||||||||||

Sbjct 187 CGATGAAGAACGCAGCGAAATGCGATAAGTAATGTGAATTGCAGAATTCAGTGAATCATC 246

Query 250 GAATCTTTGAACGCACATTGCGCCCCCTGGCATTCCGGGGGGCATGCCTGTTCGAGCGTC 309

|||||||||||||||||||||||||| || |||||||||||||||||||||||||||||

Sbjct 247 GAATCTTTGAACGCACATTGCGCCCCTCGGTATTCCGGGGGGCATGCCTGTTCGAGCGTC 306

Query 310 ATTACACCACTCAAGCCTGGCTTGGTATTGAGCGACCGCGGCCTGCCCGCGCGCTCCAAT 369

||| |||||||| ||||| ||| || ||| ||| |||| || || |||||| |||||

Sbjct 307 ATTTCACCACTCCAGCCTCGCTGGGCCTTGGGCG-CCGCCGCA--CCGGCGCGCCCCAAT 363

Query 370 GTCTCCGGCTGAGCCGTCCGTCTCTAAGCGTTGTG--AATAGCGAT-CGCTTGCGAGGCC 426

|||||||||||||||||||||||| |||||||||| || | || ||||| || || |

Sbjct 364 GTCTCCGGCTGAGCCGTCCGTCTCAAAGCGTTGTGGCAACT-CAATCCGCTTTCGGGGAC 422

Query 427 CGGGCGGTTCGACGCCGTTAAAcccccc 454

||||||||||||||||||||||| ||||

Sbjct 423 CGGGCGGTTCGACGCCGTTAAACACCCC 450

>Pseudoteratosphaeria flexuosa CBS 111012 ITS region; from TYPE material

Sequence ID: NR_155635.1 Length: 496

Range 1: 16 to 413

Score:494 bits(267), Expect:8e-140,

Identities:364/408(89%), Gaps:18/408(4%), Strand: Plus/Plus

Query 6 GAGTGTGGCGCTCCGGCGCCTCCCTCCAACCCCATGTCGAA-ACGA-CTCTGTTGCCTCG 63

||||| || |||||||| || |||||||||| ||| ||| ||| |||||||||||||

Sbjct 16 GAGTGAGG-GCTCCGGC-CCAACCTCCAACCCTTTGT-GAATTCGACCTCTGTTGCCTCG 72

Query 64 GGGGCGACCCGGCCTTC-GGGCGTCGGGGCCCCCGGCGGACACCTTCATAACTCTTGCAT 122

|||||||||||||| || ||| | |||||||||||||||||||| | ||||| |||||

Sbjct 73 GGGGCGACCCGGCCCTCTGGGTGCTGGGGCCCCCGGCGGACACCT-C--AACTC-TGCAT 128

Query 123 CTCTTGCGTCTGAGTGAT-ACATAT-AATCAATCAAAACTTTCAACAACGGATCTCTTGG 180

|| |||||||||||| || | || | ||||||||||||||||||||||||||||||||||

Sbjct 129 CT-TTGCGTCTGAGT-ATGATATTTGAATCAATCAAAACTTTCAACAACGGATCTCTTGG 186

Query 181 TTCTGGCATCGATGAAGAACGCAGCGAAATGCGATAAGTAATGTGAATTGCAGAATTCAG 240

||||||||||||||||||||||||||||||||||||||||||||||||||||||||||||

Sbjct 187 TTCTGGCATCGATGAAGAACGCAGCGAAATGCGATAAGTAATGTGAATTGCAGAATTCAG 246

Query 241 TGAATCATCGAATCTTTGAACGCACATTGCGCCCCCTGGCATTCCGGGGGGCATGCCTGT 300

||||||||||||||||||||||||||||||||||| ||| ||||||||||||||||||||

Sbjct 247 TGAATCATCGAATCTTTGAACGCACATTGCGCCCCTTGGTATTCCGGGGGGCATGCCTGT 306

Query 301 TCGAGCGTCATTACACCACTCAAGCCTGGCTTGGTATTGAGCGACCGCGGCCTG-C--CC 357

|||||||||||| |||||||||||||||||||||||||| |||| ||||| | | ||

Sbjct 307 TCGAGCGTCATTTCACCACTCAAGCCTGGCTTGGTATTGGGCGAG-GCGGCTTCACGGCC 365

Query 358 GCGCGCTCCAATGTCTCCGGCTGAGCCGTCCGTCTCTAAGCGTTGTGA 405

|| ||| ||| ||||||||||| ||| |||||||||||||||||||

Sbjct 366 GCCCGCCTCAAAGTCTCCGGCTGGACCGACCGTCTCTAAGCGTTGTGA 413

>Teratosphaeria hortaea CBS 124156 ITS region; from TYPE material

Sequence ID: NR_156520.1 Length: 604

Range 1: 146 to 593

Score:494 bits(267), Expect:8e-140,

Identities:405/467(87%), Gaps:28/467(5%), Strand: Plus/Plus

Query 28 CCTCCAACCCCATGT--CGAAACGACTCTGTTGCCTCGGGGGCGACCCGGCCTTCGGGCG 85

||||||||||||||| | |||| | |||||||||||||||||||||||| || |||

Sbjct 146 CCTCCAACCCCATGTTTCCAAAC--C-ATGTTGCCTCGGGGGCGACCCGGCCCTC--GCG 200

Query 86 TCGGGGCCCCCGGCGGACACCTTCATAACTCTTGCATCTCTTGCGTCTGAGTGATACATA 145

|||||||||||| |||| || || ||| | ||||||| ||||||||||||||| |||

Sbjct 201 CCGGGGCCCCCGGTGGAC-CCCTC--AACAC-TGCATCT-TTGCGTCTGAGTGATGAATA 255

Query 146 T-AATCAATCAAAACTTTCAACAACGGATCTCTTGGTTCTGGCATCGATGAAGAACGCAG 204

| ||||||||||||||||||||||||||||||||||||||||||||||||||||||||||

Sbjct 256 TGAATCAATCAAAACTTTCAACAACGGATCTCTTGGTTCTGGCATCGATGAAGAACGCAG 315

Query 205 CGAAATGCGATAAGTAATGTGAATTGCAGAATTCAGTGAATCATCGAATCTTTGAACGCA 264

||||||||||||||||||||||||||||||||||||||||||||||||||||||||||||

Sbjct 316 CGAAATGCGATAAGTAATGTGAATTGCAGAATTCAGTGAATCATCGAATCTTTGAACGCA 375

Query 265 CATTGCGCCCCCTGGCATTCCGGGGGGCATGCCTGTTCGAGCGTCATTACACCACTCAAG 324

||||||||||||||| ||||||||||||||||||||||||||||||||||||||||| ||

Sbjct 376 CATTGCGCCCCCTGGTATTCCGGGGGGCATGCCTGTTCGAGCGTCATTACACCACTCCAG 435

Query 325 CCTGGCTTGGTATTGAGCGACCGCGGCCTGCCCGCGCGCTCCAATGTCTCCGGCTGAGCC 384

||| ||| ||||||| ||| ||||||||| || |||||| |||||||||||| |||||

Sbjct 436 CCTCGCTGGGTATTGGGCG-CCGCGGCCT-CC-GCGCGCCTTAATGTCTCCGGCCGAGCC 492

Query 385 GTCCGTCTCTAAGCGTTGTGA-ATAGC-GAT-CGCTTGCGAGGCCCGGGCGGTTCGACGC 441

| ||||||| |||||||||| | | | | | ||||| || || |||| | | ||||||

Sbjct 493 GACCGTCTCCAAGCGTTGTGGCACAACTGTTTCGCTTTCG-GGACCGGTCCGG-CGACGC 550

Query 442 -C-GTTAAAcccccccATTTTCTATGG-TGACCGCGGATCAGGTAGG 485

| ||||||||| || || | || ||||| |||||||||||||

Sbjct 551 GCCGTTAAACCC----TTTCTCAAAGGTTGACCTCGGATCAGGTAGG 593

>Penidiella ellipsoidea CBS 128773 ITS region; from TYPE material

Sequence ID: NR_137773.1 Length: 645

Range 1: 171 to 617

Score:492 bits(266), Expect:3e-139,

Identities:402/464(87%), Gaps:23/464(4%), Strand: Plus/Plus

Query 28 CCTC-CAACCCCATGTCGAAACGACTCTGTTGCCTCGGGGGCGACCCGGCCTTCGGGCGT 86

|||| |||||||||||| | |||| ||||||||||||||||||||||||| || ||||

Sbjct 171 CCTCTCAACCCCATGTC-ACCCGACACTGTTGCCTCGGGGGCGACCCGGCCCTCTGGCGC 229

Query 87 CGGGGCCCCCGGCGGACACCTTCATAACTCTTGCATCTCTTGCGTCTGAGTGATAC-ATA 145

|||||||||||| |||| | ||| ||| | || |||| ||||||| |||| | || |||

Sbjct 230 CGGGGCCCCCGGTGGAC--CGTCA-AACGC-TGTATCT-TTGCGTCCGAGTCAAACGATA 284

Query 146 TAATCAATCAAAACTTTCAACAACGGATCTCTTGGTTCTGGCATCGATGAAGAACGCAGC 205

|||||||||||||||||||||||||||||||||||||| ||||||||||||||||||||

Sbjct 285 -AATCAATCAAAACTTTCAACAACGGATCTCTTGGTTCTAGCATCGATGAAGAACGCAGC 343

Query 206 GAAATGCGATAAGTAATGTGAATTGCAGAATTCAGTGAATCATCGAATCTTTGAACGCAC 265

||||||||||||||||||||||||||||||||||||||||||||||||||||||||||||

Sbjct 344 GAAATGCGATAAGTAATGTGAATTGCAGAATTCAGTGAATCATCGAATCTTTGAACGCAC 403

Query 266 ATTGCGCCCCCTGGCATTCCGGGGGGCATGCCTGTTCGAGCGTCATTACACCACTCAAGC 325

||||||||| |||| |||||||||||||||||||||||||||||||||||||| || |||

Sbjct 404 ATTGCGCCCTCTGGTATTCCGGGGGGCATGCCTGTTCGAGCGTCATTACACCAGTCCAGC 463

Query 326 CTGGCTTGGTATTGAGCGACCGCGGCCTGCCCGCGCGCTCCAATGTCTCCGGCTGAGCCG 385

|| ||| ||||||| ||| | ||||| |||||| |||||||||||||||||||||

Sbjct 464 CTCGCTGGGTATTGGGCGTC----GCCTGTTGGCGCGCCCCAATGTCTCCGGCTGAGCCG 519

Query 386 TCCGTCTCTAAGCGTTGTG--AATAGCGAT-CGCTTGCGAGGCCCGGGCGGTTCGACGCC 442

||||||||||||||||||| || | | |||||| |||| |||| ||| ||||||||

Sbjct 520 TCCGTCTCTAAGCGTTGTGGCAACT-CAACCCGCTTGTGAGG-CCGGTCGGCTCGACGCC 577

Query 443 GTTAAAcccccc-cATTTTCTATGGTGACCGCGGATCAGGTAGG 485

|| |||| |||| || | | | ||||| |||||||||||||

Sbjct 578 GTCAAACACCCCACA----CAAGGTTGACCTCGGATCAGGTAGG 617

>Monticola elongata CCFEE 5394 ITS region; from TYPE material

Sequence ID: NR_144972.1 Length: 464

Range 1: 21 to 446

Score:488 bits(264), Expect:4e-138,

Identities:382/437(87%), Gaps:15/437(3%), Strand: Plus/Plus

Query 16 CTCCGGCGCCTCCCTCCAACCCCATGTCGAAACGACTCTGTTGCCTCGGGGGCGACCCGG 75

|||||| || ||||||||||||||| | |||| | |||||||||||||||||||||

Sbjct 21 CTCCGGGCCCAACCTCCAACCCCATGT-TATCCGACCCAGTTGCCTCGGGGGCGACCCGG 79

Query 76 CCTTCGGGCGTCGGGGCCCCCGGCGGACACCTTCATAACTCTTGCATCTCTTGCGTCTGA 135

||||||||||||||||||||||| |||| | |||||| | ||||||| ||||||| ||

Sbjct 80 CCTTCGGGCGTCGGGGCCCCCGGTGGAC--C-ACATAAC-CCTGCATCT-TTGCGTCCGA 134

Query 136 GT-GATACATATAATCAATCAAAACTTTCAACAACGGATCTCTTGGTTCTGGCATCGATG 194

|| ||| || ||||||||||||||||||||||||||||||||||||||||||||||||

Sbjct 135 GTAGATTATTA-AATCAATCAAAACTTTCAACAACGGATCTCTTGGTTCTGGCATCGATG 193

Query 195 AAGAACGCAGCGAAATGCGATAAGTAATGTGAATTGCAGAATTCAGTGAATCATCGAATC 254

||||||||||||||||||||||||||||||||||||||||||||||||||||||||||||

Sbjct 194 AAGAACGCAGCGAAATGCGATAAGTAATGTGAATTGCAGAATTCAGTGAATCATCGAATC 253

Query 255 TTTGAACGCACATTGCGCCCCCTGGCATTCCGGGGGGCATGCCTGTTCGAGCGTCATTAC 314

||||||||||||||||||||| || |||||||||||||||||||||||||||||||| |

Sbjct 254 TTTGAACGCACATTGCGCCCCTCGGTATTCCGGGGGGCATGCCTGTTCGAGCGTCATTTC 313

Query 315 ACCACTCAAGCCTGGCTTGGTATTGAGCGACCGCGGCCTGCCCGCGCGCTCCAATGTCTC 374

|||| || ||||| ||| ||| ||| | | | |||| | | |||||||| ||||||||||

Sbjct 314 ACCAATCGAGCCTCGCTCGGTCTTGGGTGTC-GCGGTCCG-CCGCGCGCCCCAATGTCTC 371

Query 375 CGGCTGAGCCGTCCGTCTCTAAGCGTTGTG--AATAGCGATC-GCTTGCGAGGCCCGGGC 431

||||||||||||||||||| |||||||||| || | ||| ||||||||| | ||||

Sbjct 372 CGGCTGAGCCGTCCGTCTCGAAGCGTTGTGGCAACT-CAATCCGCTTGCGAG-CTCGGGG 429

Query 432 GGTTCGACGCCGTTAAA 448

|| | | ||||||||||

Sbjct 430 GGCTTGTCGCCGTTAAA 446

>Pseudoteratosphaeria secundaria ITS region; from TYPE material

Sequence ID: NR_144978.1 Length: 482

Range 1: 10 to 407

Score:488 bits(264), Expect:4e-138,

Identities:363/408(89%), Gaps:18/408(4%), Strand: Plus/Plus

Query 6 GAGTGTGGCGCTCCGGCGCCTCCCTCCAACCCCATGTCGAA-ACGA-CTCTGTTGCCTCG 63

||||| || |||||||| || |||||||||| ||| ||| ||| |||||||||||||

Sbjct 10 GAGTGAGG-GCTCCGGC-CCAACCTCCAACCCTTTGT-GAATTCGACCTCTGTTGCCTCG 66

Query 64 GGGGCGACCCGGCCTTC-GGGCGTCGGGGCCCCCGGCGGACACCTTCATAACTCTTGCAT 122

|||||||||||||| || ||| | |||||||||||| |||||||| | ||||| |||||

Sbjct 67 GGGGCGACCCGGCCCTCTGGGTGCCGGGGCCCCCGGTGGACACCT-C--AACTC-TGCAT 122

Query 123 CTCTTGCGTCTGAGTGAT-ACATAT-AATCAATCAAAACTTTCAACAACGGATCTCTTGG 180

|| |||||||||||| || | || | ||||||||||||||||||||||||||||||||||

Sbjct 123 CT-TTGCGTCTGAGT-ATGATATTTGAATCAATCAAAACTTTCAACAACGGATCTCTTGG 180

Query 181 TTCTGGCATCGATGAAGAACGCAGCGAAATGCGATAAGTAATGTGAATTGCAGAATTCAG 240

||||||||||||||||||||||||||||||||||||||||||||||||||||||||||||

Sbjct 181 TTCTGGCATCGATGAAGAACGCAGCGAAATGCGATAAGTAATGTGAATTGCAGAATTCAG 240

Query 241 TGAATCATCGAATCTTTGAACGCACATTGCGCCCCCTGGCATTCCGGGGGGCATGCCTGT 300

||||||||||||||||||||||||||||||||||| ||| ||||||||||||||||||||

Sbjct 241 TGAATCATCGAATCTTTGAACGCACATTGCGCCCCTTGGTATTCCGGGGGGCATGCCTGT 300

Query 301 TCGAGCGTCATTACACCACTCAAGCCTGGCTTGGTATTGAGCGACCGCGGCCTG-C--CC 357

|||||||||||| |||||||||||||||||||||||||| | || ||||| | | ||

Sbjct 301 TCGAGCGTCATTTCACCACTCAAGCCTGGCTTGGTATTGGGTGAG-GCGGCTTCACGGCC 359

Query 358 GCGCGCTCCAATGTCTCCGGCTGAGCCGTCCGTCTCTAAGCGTTGTGA 405

|| ||| ||| ||||||||||| ||| |||||||||||||||||||

Sbjct 360 GCCCGCCTCAAAGTCTCCGGCTGGACCGACCGTCTCTAAGCGTTGTGA 407

>Xenophacidiella pseudocatenata CBS 128776 ITS region; from TYPE material

Sequence ID: NR_137066.1 Length: 626

Range 1: 168 to 600

Score:488 bits(264), Expect:4e-138,

Identities:391/448(87%), Gaps:25/448(5%), Strand: Plus/Plus

Query 48 CGACTCTGTTGCCTCGGGGGCGACCCGGCCTTCGGGCGTCGGGGCCCCCGGCGGACACCT 107

||||||||||||||||||||||||||||||||||||||| ||||||||||| || ||

Sbjct 168 CGACTCTGTTGCCTCGGGGGCGACCCGGCCTTCGGGCGTTGGGGCCCCCGGTGG--TCC- 224

Query 108 TCATAACTCTTGCATCTCTTGCGTCTGAG--TGATACATATAATCAATCAAAACTTTCAA 165

|| ||||| ||||||| ||||||||||| ||||| || ||||||| |||||||||||

Sbjct 225 ACACAACTC-TGCATCT-TTGCGTCTGAGTATGATA-TTA-AATCAATTAAAACTTTCAA 280

Query 166 CAACGGATCTCTTGGTTCTGGCATCGATGAAGAACGCAGCGAAATGCGATAAGTAATGTG 225

||||||||||||||||||||||||||||||||||||||||||||||||||||||||||||

Sbjct 281 CAACGGATCTCTTGGTTCTGGCATCGATGAAGAACGCAGCGAAATGCGATAAGTAATGTG 340

Query 226 AATTGCAGAATTCAGTGAATCATCGAATCTTTGAACGCACATTGCGCCCCCTGGCATTCC 285

|||||||||||||||||||||||||||||||||||||||||||||||||||||| |||||

Sbjct 341 AATTGCAGAATTCAGTGAATCATCGAATCTTTGAACGCACATTGCGCCCCCTGGTATTCC 400

Query 286 GGGGGGCATGCCTGTTCGAGCGTCATTACACCACTCAAGCCTGGCTTGGTATTGAGCGAC 345

|||||||||||||||||||||||||||||||||||||||||||||||||||||| ||| |

Sbjct 401 GGGGGGCATGCCTGTTCGAGCGTCATTACACCACTCAAGCCTGGCTTGGTATTGGGCGTC 460

Query 346 CGCGGCCTGCCCGCGCGCTCCAATGTCTCC-GGCTGAGCCGTCCGTCTCTAAGCGTTGTG 404

||| || | ||||||| ||| |||||| ||||| ||||||||||||||||||||||

Sbjct 461 -GCGCCC-GTTCGCGCGCCTCAAAGTCTCCCGGCTGGACCGTCCGTCTCTAAGCGTTGTG 518

Query 405 --A-ATAGC-GAT-C-GCTTGCGAGGCCCGGGCGGTTCGACGCCGTTAAAcccccccATT 458

| || | | | | |||| ||| | ||| |||||| ||||||||||| | ||

Sbjct 519 GCACATTTCTGTTTCCGCTTCGGAGTACGGGG-GGTTCG-CGCCGTTAAACTTC----TT 572

Query 459 TTCTATGG-TGACCGCGGATCAGGTAGG 485

|| | || ||||| |||||||||||||

Sbjct 573 ATCAAAGGTTGACCTCGGATCAGGTAGG 600

>Teratosphaeria biformis CBS 124578 ITS region; from TYPE material

Sequence ID: NR_137699.1 Length: 482

Range 1: 53 to 418

Score:486 bits(263), Expect:1e-137,

Identities:344/380(91%), Gaps:17/380(4%), Strand: Plus/Plus

Query 28 CCTCCAACCCCATGT--CGAAACGACTCTGTTGCCTCGGGGGCGACCCGGCCTTCGGGCG 85

||||||||||||||| | |||| | |||||||||||||||||||||||| | |||

Sbjct 53 CCTCCAACCCCATGTTTCCAAAC--C-ATGTTGCCTCGGGGGCGACCCGGCC-GC-CGCG 107

Query 86 TCGGGGCCCCCGGCGGACACCTTCATAACTCTTGCATCTCTTGCGTCTGAGTGATA-CAT 144

|||||||||||| |||| || || ||||| ||||||| |||||||||||||||| ||

Sbjct 108 CCGGGGCCCCCGGTGGAC-CCCTC--AACTC-TGCATCT-TTGCGTCTGAGTGATATAAT 162

Query 145 ATAATCAATCAAAACTTTCAACAACGGATCTCTTGGTTCTGGCATCGATGAAGAACGCAG 204

| ||||||||||||||||||||||||||||||||||||||||||||||||||||||||||

Sbjct 163 A-AATCAATCAAAACTTTCAACAACGGATCTCTTGGTTCTGGCATCGATGAAGAACGCAG 221

Query 205 CGAAATGCGATAAGTAATGTGAATTGCAGAATTCAGTGAATCATCGAATCTTTGAACGCA 264

||||||||||||||||||||||||||||||||||||||||||||||||||||||||||||

Sbjct 222 CGAAATGCGATAAGTAATGTGAATTGCAGAATTCAGTGAATCATCGAATCTTTGAACGCA 281

Query 265 CATTGCGCCCCCTGGCATTCCGGGGGGCATGCCTGTTCGAGCGTCATTACACCACTCAAG 324

|||||||||| |||| ||||||| ||||||||||||||||||||||||||||||||| ||

Sbjct 282 CATTGCGCCCTCTGGTATTCCGGAGGGCATGCCTGTTCGAGCGTCATTACACCACTCCAG 341

Query 325 CCTGGCTTGGTATTGAGCGACCGCGGCCTGCCCGCGCGCTCCAATGTCTCCGGCTGAGCC 384

||| ||| ||||||| ||| ||||||||| || |||||| ||||||||||||| |||||

Sbjct 342 CCTCGCTGGGTATTGGGCG-CCGCGGCCT-CC-GCGCGCCTCAATGTCTCCGGCCGAGCC 398

Query 385 GTCCGTCTCTAAGCGTTGTG 404

| ||||||||||||||||||

Sbjct 399 GACCGTCTCTAAGCGTTGTG 418

>Teratosphaeria micromaculata CBS 124582 ITS region; from TYPE material

Sequence ID: NR_137698.1 Length: 486

Range 1: 53 to 418

Score:486 bits(263), Expect:1e-137,

Identities:344/380(91%), Gaps:17/380(4%), Strand: Plus/Plus

Query 28 CCTCCAACCCCATG--TCGAAACGACTCTGTTGCCTCGGGGGCGACCCGGCCTTCGGGCG 85

|||||||||||||| || |||| | |||||||||||||||||||||||| | |||

Sbjct 53 CCTCCAACCCCATGCTTCCAAAC--C-ATGTTGCCTCGGGGGCGACCCGGCC-GC-CGCG 107

Query 86 TCGGGGCCCCCGGCGGACACCTTCATAACTCTTGCATCTCTTGCGTCTGAGTGATA-CAT 144

|||||||||||| |||| || || ||||| |||||| |||||||||||||||| |||

Sbjct 108 CCGGGGCCCCCGGTGGAC-CCCTC--AACTC-TGCATC-GTTGCGTCTGAGTGATAACAT 162

Query 145 ATAATCAATCAAAACTTTCAACAACGGATCTCTTGGTTCTGGCATCGATGAAGAACGCAG 204

| ||||||||||||||||||||||||||||||||||||||||||||||||||||||||||

Sbjct 163 A-AATCAATCAAAACTTTCAACAACGGATCTCTTGGTTCTGGCATCGATGAAGAACGCAG 221

Query 205 CGAAATGCGATAAGTAATGTGAATTGCAGAATTCAGTGAATCATCGAATCTTTGAACGCA 264

||||||||||||||||||||||||||||||||||||||||||||||||||||||||||||

Sbjct 222 CGAAATGCGATAAGTAATGTGAATTGCAGAATTCAGTGAATCATCGAATCTTTGAACGCA 281

Query 265 CATTGCGCCCCCTGGCATTCCGGGGGGCATGCCTGTTCGAGCGTCATTACACCACTCAAG 324

|||||||||| |||| ||||||| ||||||||||||||||||||||||||||||||| ||

Sbjct 282 CATTGCGCCCTCTGGTATTCCGGAGGGCATGCCTGTTCGAGCGTCATTACACCACTCCAG 341

Query 325 CCTGGCTTGGTATTGAGCGACCGCGGCCTGCCCGCGCGCTCCAATGTCTCCGGCTGAGCC 384

||| ||| ||||||| ||| ||||||||| || |||||| ||||||||||||| |||||

Sbjct 342 CCTCGCTGGGTATTGGGCG-CCGCGGCCT-CC-GCGCGCCTCAATGTCTCCGGCCGAGCC 398

Query 385 GTCCGTCTCTAAGCGTTGTG 404

| ||||||||||||||||||

Sbjct 399 GACCGTCTCTAAGCGTTGTG 418

>Constantinomyces macerans TRN 440 ITS region; from TYPE material

Sequence ID: NR_164011.1 Length: 462

Range 1: 30 to 445

Score:486 bits(263), Expect:1e-137,

Identities:377/429(88%), Gaps:19/429(4%), Strand: Plus/Plus

Query 28 CCTC-CAACCCCATGTCGAAACGACTCTGTTGCCTCGGGGGCGACCCGGCCTTCGGGCGT 86

|||| ||||||||||| | |||| ||||||||||||||||||||||||| || ||||

Sbjct 30 CCTCTCAACCCCATGTTG-CCCGACACTGTTGCCTCGGGGGCGACCCGGCCCTCCGGCGC 88

Query 87 CGGGGCCCCCGGCGGACACCTTCATAACTCTTGCATCTCTTGCGTCTGAGTGATACAT-A 145

|||||||||||| |||| | ||| ||| | ||||||| |||||| |||| | | || |

Sbjct 89 CGGGGCCCCCGGTGGAC--CGTCA-AACAC-TGCATCT-GTGCGTCCGAGTCA-A-ATGA 141

Query 146 T-AATCAATCAAAACTTTCAACAACGGATCTCTTGGTTCTGGCATCGATGAAGAACGCAG 204

| ||||||||||||||||||||||||||||||||||||||||||||||||||||||||||

Sbjct 142 TAAATCAATCAAAACTTTCAACAACGGATCTCTTGGTTCTGGCATCGATGAAGAACGCAG 201

Query 205 CGAAATGCGATAAGTAATGTGAATTGCAGAATTCAGTGAATCATCGAATCTTTGAACGCA 264

||||||||||||||||||||||||||||||||||||||||||||||||||||||||||||

Sbjct 202 CGAAATGCGATAAGTAATGTGAATTGCAGAATTCAGTGAATCATCGAATCTTTGAACGCA 261

Query 265 CATTGCGCCCCCTGGCATTCCGGGGGGCATGCCTGTTCGAGCGTCATTACACCACTCAAG 324

|||||||||| |||| |||||||||||||||||||||||||||||||| |||||||| ||

Sbjct 262 CATTGCGCCCTCTGGTATTCCGGGGGGCATGCCTGTTCGAGCGTCATTTCACCACTCCAG 321

Query 325 CCTGGCTTGGTATTGAGCGACCGCGGCCTGCCCGCGCGCTCCAATGTCTCCGGCTGAGCC 384

||||||| ||||||| ||| | || || | | |||||| ||||||||||||||||||||

Sbjct 322 CCTGGCTGGGTATTGGGCGTC-GCCGCGT-CG-GCGCGCCCCAATGTCTCCGGCTGAGCC 378

Query 385 GTCCGTCTCTAAGCGTTGTG--AATAGCGATC-GCTTGCGAGGCCCGGGCGGTTCGACGC 441

||||||||| |||||||||| || | ||| ||||| | | | || |||||||||||

Sbjct 379 GTCCGTCTCAAAGCGTTGTGGCAACT-CAATCCGCTTGTGGGACGCGT-CGGTTCGACGC 436

Query 442 CGTTAAAcc 450

|||||||||

Sbjct 437 CGTTAAACC 445

>Lapidomyces stipagrostidicola CBS 146979 ITS region; from TYPE material

Sequence ID: NR_173043.1 Length: 543

Range 1: 47 to 523

Score:484 bits(262), Expect:5e-137,

Identities:423/495(85%), Gaps:33/495(6%), Strand: Plus/Plus

Query 6 GAGTG-TGGCGCTCCGGCGCCTCCCTCCAACCCCATGTCGAAAC-GACTCTGTTGCCTCG 63

||||| ||| ||||||| || |||||||||| ||| | | |||||||||||||||

Sbjct 47 GAGTGAGGGCCCTCCGGC-CCGACCTCCAACCCTTTGT--ATTCTGACTCTGTTGCCTCG 103

Query 64 GGGGCGACCC-GGCCTT--CGGGCGTCGGGGCCCCCGGCGGACACCTTCATAACTCTTGC 120

|||||||||| | |||| ||||||| ||||||||||| |||| | || ||||| |||

Sbjct 104 GGGGCGACCCTGCCCTTCGCGGGCGTTGGGGCCCCCGGTGGAC---TACACAACTC-TGC 159

Query 121 ATCTCTTGCGTCTGAGTGATACA-TAT-AA-TCAATCAAAACTTTCAACAACGGATCTCT 177

|||| |||||||||||| | ||| | | || | |||||||||||||||||||||||||||

Sbjct 160 ATCT-TTGCGTCTGAGT-A-ACATTTTGAATTAAATCAAAACTTTCAACAACGGATCTCT 216

Query 178 TGGTTCTGGCATCGATGAAGAACGCAGCGAAATGCGATAAGTAATGTGAATTGCAGAATT 237

||||||||||||||||||||||||||||||||||||||||||||||||||||||||||||

Sbjct 217 TGGTTCTGGCATCGATGAAGAACGCAGCGAAATGCGATAAGTAATGTGAATTGCAGAATT 276

Query 238 CAGTGAATCATCGAATCTTTGAACGCACATTGCGCCCCCTGGCATTCCGGGGGGCATGCC 297

|||||||||||||||||||||||||||||||||||||| ||| |||||| ||||||||||

Sbjct 277 CAGTGAATCATCGAATCTTTGAACGCACATTGCGCCCCTTGGTATTCCGAGGGGCATGCC 336

Query 298 TGTTCGAGCGTCATTACACCACTCAAGCCTGGCTTGGTATTGAGCGACCGCGGCCTGCCC 357

|||||||||||||||||||||||||||||| ||||||||||| ||| ||||| | | |

Sbjct 337 TGTTCGAGCGTCATTACACCACTCAAGCCTCGCTTGGTATTGGGCG-CCGCG-CTTCGGC 394

Query 358 GCGCGCTCCAATGTCTCCGGCTGAGCCGTCCGTCTCTAAGCGTTGTGA-A-T-AGCGAT- 413

|||||| |||||| |||||||||||||||||||||||||||||||| | | | |

Sbjct 395 GCGCGCCTCAATGTATCCGGCTGAGCCGTCCGTCTCTAAGCGTTGTGGCACTTTATGTTT 454

Query 414 C-GCTTGCGAGGCCCGGGCGGT-TCGACGCCGTTAAAcccccccATTTTCTATGG-TGAC 470

| |||| |||| | || |||| ||| |||||||||||||||| || | | || ||||

Sbjct 455 CCGCTTCGGAGGTC-GGTCGGTCTCG-CGCCGTTAAACCCCCC-AT---CAAAGGTTGAC 508

Query 471 CGCGGATCAGGTAGG 485

| |||||||||||||

Sbjct 509 CTCGGATCAGGTAGG 523

>Constantinomyces oldenburgensis CBS 144642 ITS region; from TYPE material

Sequence ID: NR_159758.1 Length: 581

Range 1: 30 to 503

Score:483 bits(261), Expect:2e-136,

Identities:414/485(85%), Gaps:22/485(4%), Strand: Plus/Plus

Query 12 GGCGCTCCGGCGCCTCCCTC-CAACCCCATGTCGAAACGACTCTGTTGCCTCGGGGGCGA 70

||| |||||| || |||| ||||||||||| | |||| ||||||||||||||||||

Sbjct 30 GGC-CTCCGGGTCCGACCTCTCAACCCCATGT-TATCCGACACTGTTGCCTCGGGGGCGA 87

Query 71 CCCGGCC---TTCGGGCGTCGGGGCCCCCGGCGGACACCTTCATAACTCTTGCATCTCTT 127

||||||| |||||||||||||||||||||||| | ||| ||| | ||||||| |

Sbjct 88 CCCGGCCCCACACGGGCGTCGGGGCCCCCGGCGGAC--CGTCA-AACGC-TGCATCT-GT 142

Query 128 GCGTCTGAGTGAT-A-CATATAATCAATCAAAACTTTCAACAACGGATCTCTTGGTTCTG 185

||||| |||| || | | | ||||||||||||||||||||||||||||||||||||||

Sbjct 143 GCGTCCGAGTCATTATGAGA-AATCAATCAAAACTTTCAACAACGGATCTCTTGGTTCTA 201

Query 186 GCATCGATGAAGAACGCAGCGAAATGCGATAAGTAATGTGAATTGCAGAATTCAGTGAAT 245

||||||||||||||||||||||||||||||||||||||||||||||||||||||||||||

Sbjct 202 GCATCGATGAAGAACGCAGCGAAATGCGATAAGTAATGTGAATTGCAGAATTCAGTGAAT 261

Query 246 CATCGAATCTTTGAACGCACATTGCGCCCCCTGGCATTCCGGGGGGCATGCCTGTTCGAG 305

||||||||||||||||||||||||||||| |||| |||||||||||||||||||||||||

Sbjct 262 CATCGAATCTTTGAACGCACATTGCGCCCTCTGGTATTCCGGGGGGCATGCCTGTTCGAG 321

Query 306 CGTCATTACACCACTCAAGCCTGGCTTGGTATTGAGCGACCGCGGC-CTGCCCGCGCGCT 364

||||||| |||||||| ||||| ||| || ||| ||| |||| || | | | ||||||

Sbjct 322 CGTCATTTCACCACTCCAGCCTCGCTGGGCCTTGGGCG-CCGCTGCTCCGTCGGCGCGCC 380

Query 365 CCAATGTCTCCGGCTGAGCCGTCCGTCTCTAAGCGTTGTG--AATAGCGATC-GCTTGCG 421

| ||||||||||||||||||||||||||| |||||||||| || | ||| ||||| |

Sbjct 381 CTAATGTCTCCGGCTGAGCCGTCCGTCTCAAAGCGTTGTGGCAACT-CAATCCGCTTGTG 439

Query 422 AGGCCCGGGCGGTTCGACGCCGTTAAAcccccccATTTT-CTATGGTGACCGCGGATCAG 480

|| ||||| |||||| |||||| ||| | | ||||||| | | | ||||| ||||||||

Sbjct 440 -GGACCGGGGGGTTCGTCGCCGTCAAAACACACCATTTTACCAGGTTGACCTCGGATCAG 498

Query 481 GTAGG 485

|||||

Sbjct 499 GTAGG 503

>Teratosphaeria complicata CBS 125216 ITS region; from TYPE material

Sequence ID: NR_160236.1 Length: 501

Range 1: 64 to 480

Score:483 bits(261), Expect:2e-136,

Identities:379/432(88%), Gaps:23/432(5%), Strand: Plus/Plus

Query 28 CCTCCAACCCCATGT--CGAAACGACTCTGTTGCCTCGGGGGCGACCCGGCCTTCGGGCG 85

||||||||||||||| | |||| | |||||||||||||||||||||||| | ||||

Sbjct 64 CCTCCAACCCCATGTTTCCAAAC--C-ATGTTGCCTCGGGGGCGACCCGGCCGT--GGCG 118

Query 86 TCGGGGCCCCCGGCGGACACCTTCATAACTCTTGCATCTCTTGCGTCTGAGTGATACATA 145

|||||||||||| |||| || || ||| | ||||||| ||||||||||||||| |||

Sbjct 119 CCGGGGCCCCCGGTGGAC-CCCTC--AACAC-TGCATCT-TTGCGTCTGAGTGATGAATA 173

Query 146 T-AATCAATCAAAACTTTCAACAACGGATCTCTTGGTTCTGGCATCGATGAAGAACGCAG 204

| ||||||||||||||||||||||||||||||||||||||||||||||||||||||||||

Sbjct 174 TAAATCAATCAAAACTTTCAACAACGGATCTCTTGGTTCTGGCATCGATGAAGAACGCAG 233

Query 205 CGAAATGCGATAAGTAATGTGAATTGCAGAATTCAGTGAATCATCGAATCTTTGAACGCA 264

||||||||||||||||||||||||||||||||||||||||||||||||||||||||||||

Sbjct 234 CGAAATGCGATAAGTAATGTGAATTGCAGAATTCAGTGAATCATCGAATCTTTGAACGCA 293

Query 265 CATTGCGCCCCCTGGCATTCCGGGGGGCATGCCTGTTCGAGCGTCATTACACCACTCAAG 324

||||||||||| ||| ||||||||||||||||||||||||||||||||||||||||| ||

Sbjct 294 CATTGCGCCCCTTGGTATTCCGGGGGGCATGCCTGTTCGAGCGTCATTACACCACTCCAG 353

Query 325 CCTGGCTTGGTATTGAGCGACCGCGGCCTGCCCGCGCGCTCCAATGTCTCCGGCTGAGCC 384

|| ||| ||||||| ||| ||||||||| || |||||| ||| ||||||||| |||||

Sbjct 354 CCCCGCTGGGTATTGGGCG-CCGCGGCCT-CC-GCGCGCCTCAACGTCTCCGGCCGAGCC 410

Query 385 GTCCGTCTCTAAGCGTTGTGA-ATAGC-GAT-CGCTTGCGAGGCCCGGGC-GGTT-CGAC 439

| |||||||||||||||||| | | | | | ||||| || || |||| | || || |

Sbjct 411 GACCGTCTCTAAGCGTTGTGGCACAACTGTTTCGCTTTCG-GGACCGGTCTGGCGGCG-C 468

Query 440 GCCGTTAAAccc 451

||||||||||||

Sbjct 469 GCCGTTAAACCC 480

>Teratosphaeria miniata ITS region; from TYPE material

Sequence ID: NR_156534.1 Length: 636

Range 1: 163 to 578

Score:483 bits(261), Expect:2e-136,

Identities:379/432(88%), Gaps:24/432(5%), Strand: Plus/Plus

Query 28 CCTCCAACCCCATGT--CGAAACGACTCTGTTGCCTCGGGGGCGACCCGGCCTTCGGGCG 85

||||||||||||||| | |||| | |||||||||||||||||||||||| | |||

Sbjct 163 CCTCCAACCCCATGTTTCCAAAC--C-ATGTTGCCTCGGGGGCGACCCGGCC-AC-CGCG 217

Query 86 TCGGGGCCCCCGGCGGACACCTTCATAACTCTTGCATCTCTTGCGTCTGAGTGATAC-AT 144

|||||||||||| |||| || || ||||| ||||||| |||||||||||| | || |

Sbjct 218 CCGGGGCCCCCGGTGGAC-CCCTC--AACTC-TGCATCT-TTGCGTCTGAGT-A-ACAAA 270

Query 145 AT-AATCAATCAAAACTTTCAACAACGGATCTCTTGGTTCTGGCATCGATGAAGAACGCA 203

|| |||||||||||||||||||||||||||||||||||||||||||||||||||||||||

Sbjct 271 ATAAATCAATCAAAACTTTCAACAACGGATCTCTTGGTTCTGGCATCGATGAAGAACGCA 330

Query 204 GCGAAATGCGATAAGTAATGTGAATTGCAGAATTCAGTGAATCATCGAATCTTTGAACGC 263

||||||||||||||||||||||||||||||||||||||||||||||||||||||||||||

Sbjct 331 GCGAAATGCGATAAGTAATGTGAATTGCAGAATTCAGTGAATCATCGAATCTTTGAACGC 390

Query 264 ACATTGCGCCCCCTGGCATTCCGGGGGGCATGCCTGTTCGAGCGTCATTACACCACTCAA 323

||||||||||| |||| ||||||| |||||||||||||||||||||||||||||||||||

Sbjct 391 ACATTGCGCCCTCTGGTATTCCGGAGGGCATGCCTGTTCGAGCGTCATTACACCACTCAA 450

Query 324 GCCTGGCTTGGTATTGAGCGACCGCGGCCTGCCCGCGCGCTCCAATGTCTCCGGCTGAGC 383

|||| ||||||||||| ||| | ||||||| || |||||| ||||||||||||| ||||

Sbjct 451 GCCTCGCTTGGTATTGGGCGTC-GCGGCCT-CC-GCGCGCCTCAATGTCTCCGGCCGAGC 507

Query 384 CGTCCGTCTCTAAGCGTTGTGA-ATAGC-GA-TCGCTTGCGAGGCCCGGGCGGTT-CGAC 439

|| ||||||| |||||||||| | | | | |||||| |||| || | |||| || |

Sbjct 508 CGACCGTCTCCAAGCGTTGTGGCACAACTGTTTCGCTTCCGAGACCGGTCCGGTGACG-C 566

Query 440 GCCGTTAAAccc 451

||||||||||||

Sbjct 567 GCCGTTAAACCC 578

>Penidiella drakensbergensis CPC 19778 ITS region; from TYPE material

Sequence ID: NR_111821.1 Length: 547

Range 1: 43 to 521

Score:481 bits(260), Expect:6e-136,

Identities:417/490(85%), Gaps:21/490(4%), Strand: Plus/Plus

Query 6 GAGTGTGGCGCTCCGGCGCCTCCCTCCAACCCCATGTCGAAAC-GACTCTGTTGCCTCGG 64

||||| || |||||| || |||||||||||||||| | | || |||||||||||

Sbjct 43 GAGTGAGGGCCTCCGGGTCCGACCTCCAACCCCATGTC-ATTCATACCATGTTGCCTCGG 101

Query 65 GGGCGACCCGGCCTTCGGGCGTCGGGGCCCCCGGCGGACACCTTCATAACTCTTGCATCT 124

|||||||||||||||||||||||||||||||||| |||| || ||| ||| | |||||||

Sbjct 102 GGGCGACCCGGCCTTCGGGCGTCGGGGCCCCCGGTGGAC-CCATCA-AAC-CCTGCATCT 158

Query 125 CTTGCGTCTGAGTGATACATATAATCAATCAAAACTTTCAACAACGGATCTCTTGGTTCT 184

|||||| |||| | ||| ||||||| ||||||||||||||||||||||||||||||

Sbjct 159 -GTGCGTCCGAGTCAATTATA-AATCAATTAAAACTTTCAACAACGGATCTCTTGGTTCT 216

Query 185 GGCATCGATGAAGAACGCAGCGAAATGCGATAAGTAATGTGAATTGCAGAATTCAGTGAA 244

||||||||||||||||||||||||||||||||||||||||||||||||||||||||||||

Sbjct 217 GGCATCGATGAAGAACGCAGCGAAATGCGATAAGTAATGTGAATTGCAGAATTCAGTGAA 276

Query 245 TCATCGAATCTTTGAACGCACATTGCGCCCCCTGGCATTCCGGGGGGCATGCCTGTTCGA 304

||||||||||||||||||||||||||||||| || ||||||||||||||||||||||||

Sbjct 277 TCATCGAATCTTTGAACGCACATTGCGCCCCTCGGTATTCCGGGGGGCATGCCTGTTCGA 336

Query 305 GCGTCATTACACCACTCAAGCCTGGCTTGGTATTGAGCGACCGCGGCCTGCCCGCGCGCT 364

||||||||||||||||||||||||||||||||||| || ||||||| | ||| ||||||

Sbjct 337 GCGTCATTACACCACTCAAGCCTGGCTTGGTATTGGGC-ACCGCGGTCCGCC-GCGCGCC 394

Query 365 CCAATGTCTCCGGCTGAGCCGTCCGTCTCTAAGCGTTGTGAATAGCGATC-GCTTGCG-A 422

| ||||||| ||||||||||| | ||| ||||||| | || ||||| ||| ||| |

Sbjct 395 CTAATGTCTTCGGCTGAGCCGGTTGACTCCCAGCGTTGCGG-TAACGATCCGCT-GCGGA 452

Query 423 GGCCCGGGCGGTTCGACGCCGTTAAAcccccc--c--AT--TTTCTATGG-TGACCGCGG 475

|| || || || |||||| ||||||| | | | |||||| || ||||| |||

Sbjct 453 GGAA-GGCCGACTCATCGCCGTCAAACCCCTCTTCGGAGACTTTCTAAGGTTGACCTCGG 511

Query 476 ATCAGGTAGG 485

||||||||||

Sbjct 512 ATCAGGTAGG 521

>Friedmanniomyces endolithicus CCFEE 5208 ITS region; from TYPE material

Sequence ID: NR_144917.1 Length: 516

Range 1: 26 to 477

Score:481 bits(260), Expect:6e-136,

Identities:399/464(86%), Gaps:18/464(3%), Strand: Plus/Plus

Query 28 CCTCCAACCCCATGTCGAAACGA-CTCTGTTGCCTCGGGGGCGACCCGGCCTTCGGGCGT 86

||||||||||| ||| | ||| | ||||||||| ||||||||||||||||||||||||

Sbjct 26 CCTCCAACCCCCTGT-TATCCGACCACTGTTGCCTTGGGGGCGACCCGGCCTTCGGGCGT 84

Query 87 CGGGGCCCCCGGCGGACACCTTCATAACTCTTGCATCTCTTGCGTCTGAGTGATAC-ATA 145

|||||||||| |||| || || ||| | ||||||| |||||| |||| | || ||

Sbjct 85 CGGGGCCCCCAATGGAC-CCGTC--AAC-CCTGCATCT-GTGCGTCCGAGTCA-ACGATT 138

Query 146 TAATCAATCAAAACTTTCAACAACGGATCTCTTGGTTCTGGCATCGATGAAGAACGCAGC 205

|||||||||||||||||||||||||||||||||||||||||||||||||||||||||||

Sbjct 139 GAATCAATCAAAACTTTCAACAACGGATCTCTTGGTTCTGGCATCGATGAAGAACGCAGC 198

Query 206 GAAATGCGATAAGTAATGTGAATTGCAGAATTCAGTGAATCATCGAATCTTTGAACGCAC 265

||||||||||||||||||||||||||||||||||||||||||||||||||||||||||||

Sbjct 199 GAAATGCGATAAGTAATGTGAATTGCAGAATTCAGTGAATCATCGAATCTTTGAACGCAC 258

Query 266 ATTGCGCCCCCTGGCATTCCGGGGGGCATGCCTGTTCGAGCGTCATTACACCACTCAAGC 325

||||||||| |||| ||||| |||||||||||||||||||||||||| |||||||| |||

Sbjct 259 ATTGCGCCCTCTGGTATTCCAGGGGGCATGCCTGTTCGAGCGTCATTTCACCACTCCAGC 318

Query 326 CTGGCTTGGTATTGAGCGACCGCGGCCT-GCCCGCGCGCTCCAATGTCTCCGGCTGAGCC 384

|| ||| ||| ||| ||| |||||| || ||| |||||| |||||||| |||||| |||

Sbjct 319 CTCGCTGGGTCTTGGGCG-CCGCGGGCTCGCCTGCGCGCCCCAATGTCCTCGGCTGGGCC 377

Query 385 GTCCGTCTCTAAGCGTTGTG--AATAGCGAT-CGCTTGCGAGGCCCGGGCGGTTCGACGC 441

||||||||| |||||||||| || | || ||||||||||| |||| || || |||

Sbjct 378 GTCCGTCTCAAAGCGTTGTGGCAACT-CAATCCGCTTGCGAGGT-CGGGAGGCCCGTCGC 435

Query 442 CGTTAAAcccccccATTTTCTATGGTGACCGCGGATCAGGTAGG 485

|| |||||||||||| | | | ||||| |||||||||||||

Sbjct 436 CGCCAAACCCCCCCATCA-C-AGGTTGACCTCGGATCAGGTAGG 477

>Devriesia tardicrescens CBS 128770 ITS region; from TYPE material

Sequence ID: NR_137771.1 Length: 603

Range 1: 162 to 580

Score:481 bits(260), Expect:6e-136,

Identities:379/434(87%), Gaps:18/434(4%), Strand: Plus/Plus

Query 55 GTTGCCTCGGGGGCGACCCGGCCTTCGGGCGTCGGGGCCCCCGGCGGACACCTTCATAAC 114

|||||||||||||||||||||||||||||||||||||||||||| || | | ||| |||

Sbjct 162 GTTGCCTCGGGGGCGACCCGGCCTTCGGGCGTCGGGGCCCCCGGTGG-CCCATTC--AAC 218

Query 115 TCTTGCATCTCTTGCGTCTGAGTGATACATATAATCAATCAAAACTTTCAACAACGGATC 174

|| ||||||| ||||||||| || | | |||||| ||||||||| |||||||||||

Sbjct 219 TC-TGCATCT-GAGCGTCTGAGCGA-ATAGCGAATCAAACAAAACTTTTAACAACGGATC 275

Query 175 TCTTGGTTCTGGCATCGATGAAGAACGCAGCGAAATGCGATAAGTAATGTGAATTGCAGA 234

||||||||||||||||||||||||||||||||||||||||||||||||||||||||||||

Sbjct 276 TCTTGGTTCTGGCATCGATGAAGAACGCAGCGAAATGCGATAAGTAATGTGAATTGCAGA 335

Query 235 ATTCAGTGAATCATCGAATCTTTGAACGCACATTGCGCCCCCTGGCATTCCGGGGGGCAT 294

||||||||||||||||||||||||||||||||||||||||| ||| ||||||||||||||

Sbjct 336 ATTCAGTGAATCATCGAATCTTTGAACGCACATTGCGCCCCTTGGTATTCCGGGGGGCAT 395

Query 295 GCCTGTTCGAGCGTCATTACACCACTCAAGCCTGGCTTGGTATTGAGCGACCGCGGCCTG 354

||| ||||||||||||||||||||||||||||||||||||||||| ||| ||||| |||

Sbjct 396 GCCCGTTCGAGCGTCATTACACCACTCAAGCCTGGCTTGGTATTGGGCG-CCGCGCTCTG 454

Query 355 CCCGCGCGCTCCAATGTCTCCGGCTGAGCCGTCCGTCTCTAAGCGTTGTG-AATAGCGAT 413

| |||||| |||||| | |||| ||||||||||||||||||||||||| ||| | ||

Sbjct 455 GC-GCGCGCCTCAATGTGTTCGGCCGAGCCGTCCGTCTCTAAGCGTTGTGCAAT--CAAT 511

Query 414 C-GCTTGCGAGGCCCGGGCGGTTCGACGCCGTTAAAcccccccATTTTCTATGG-TGACC 471

| |||||||| | || |||| | |||||||||||||| | || | | || |||||

Sbjct 512 CCGCTTGCGATTC--GGACGGTCCCGCGCCGTTAAACCCCTCTAT---CAAAGGTTGACC 566

Query 472 GCGGATCAGGTAGG 485

|||||| ||||||

Sbjct 567 TCGGATCGGGTAGG 580

>Caatingomyces brasiliensis URM 7916 ITS region; from TYPE material

Sequence ID: NR_191078.1 Length: 494

Range 1: 59 to 478

Score:479 bits(259), Expect:2e-135,

Identities:376/430(87%), Gaps:18/430(4%), Strand: Plus/Plus

Query 28 CCTCCAACCCCATGTCGAAACGACTCTGTTGCCTCGGGGGCGACCCGGCCTTCG-GGCGT 86

||||||||||||||| |||||||||||||||||||||||||||||||||| |||

Sbjct 59 CCTCCAACCCCATGT-TTTCCGACTCTGTTGCCTCGGGGGCGACCCGGCCTTCGCGGCCG 117

Query 87 CGGGGCCCCCGGCGGACACCTTCATAACTCTTGCATCTCTTGCGTCTGAGTGATACA-TA 145

| |||||||| || | | || ||||| |||||| | |||||||||| || | |

Sbjct 118 C-CCGCCCCCGGTGGTCTAC-TC--AACTC-TGCATC-ATAGCGTCTGAGT-TTAAATTG 170

Query 146 TAATCAATCAAAACTTTCAACAACGGATCTCTTGGTTCTGGCATCGATGAAGAACGCAGC 205

|||||||||||||||||||||||||||||||||||||||||||||||||||||||||||

Sbjct 171 AAATCAATCAAAACTTTCAACAACGGATCTCTTGGTTCTGGCATCGATGAAGAACGCAGC 230

Query 206 GAAATGCGATAAGTAATGTGAATTGCAGAATTCAGTGAATCATCGAATCTTTGAACGCAC 265

||||||||||||||||||||||||||||||||||||||||||||||||||||||||||||

Sbjct 231 GAAATGCGATAAGTAATGTGAATTGCAGAATTCAGTGAATCATCGAATCTTTGAACGCAC 290

Query 266 ATTGCGCCCCCTGGCATTCCGGGGGGCATGCCTGTTCGAGCGTCATTACACCACTCAAGC 325

|||||||||||||| | |||||||||||||||||||||||||||||||||||||||||||

Sbjct 291 ATTGCGCCCCCTGGTACTCCGGGGGGCATGCCTGTTCGAGCGTCATTACACCACTCAAGC 350

Query 326 CTGGCTTGGTATTGAGCGACCGCGGC-CTGC--CCGCGCGCTCCAATGTCTCCGGCTGAG 382

|||||||||||||| ||| |||||| || | |||||||| ||||||| |||||| |

Sbjct 351 CTGGCTTGGTATTGGGCG-CCGCGGATCTCCGTCCGCGCGCCTCAATGTCCTCGGCTGGG 409

Query 383 CCGTCCGTCTCTAAGCGTTGTGA--ATAGCGATCGCTTGCGAGGCCCGGGCGGTT-CGAC 439

||||||| ||| ||||||||||| || ||||||||||||||| |||||||| || |

Sbjct 410 CCGTCCGCCTCGAAGCGTTGTGATCATCTCGATCGCTTGCGAGGGCCGGGCGGCCGCG-C 468

Query 440 GCCGTTAAAc 449

|||| |||||

Sbjct 469 GCCGGTAAAC 478

>Teratosphaericola pseudoafricana CBS 114782 ITS region; from TYPE material

Sequence ID: NR_154468.1 Length: 489

Range 1: 57 to 485

Score:479 bits(259), Expect:2e-135,

Identities:390/448(87%), Gaps:29/448(6%), Strand: Plus/Plus

Query 48 CGACTCTGTTGCCTCGGGGGCGACCCGGCCTTCGGGCGTCGGGGCCCCCGGCGGACACCT 107

|||| ||||||||||||||||||||||||||||||||||||||||||||||||||| |

Sbjct 57 CGACCCTGTTGCCTCGGGGGCGACCCGGCCTTCGGGCGTCGGGGCCCCCGGCGGACCAC- 115

Query 108 TCATAACTCTTGCATCTCTTGCGTCTGAGTGATACATAT-AA-TCAATCAAAACTTTCAA 165

|| ||||| ||||||| |||||||||||| | |||| || | |||||||||||||||

Sbjct 116 TC--AACTC-TGCATCT-TTGCGTCTGAGT-CT-TATATGAATTAAATCAAAACTTTCAA 169

Query 166 CAACGGATCTCTTGGTTCTGGCATCGATGAAGAACGCAGCGAAATGCGATAAGTAATGTG 225

||||||||||||||||||||||||||||||||||||||||||||||||||||||||||||

Sbjct 170 CAACGGATCTCTTGGTTCTGGCATCGATGAAGAACGCAGCGAAATGCGATAAGTAATGTG 229

Query 226 AATTGCAGAATTCAGTGAATCATCGAATCTTTGAACGCACATTGCGCCCCCTGGCATTCC 285

|||||||||||||||||||||||||||||||||||||||||||||||||| ||| |||||

Sbjct 230 AATTGCAGAATTCAGTGAATCATCGAATCTTTGAACGCACATTGCGCCCCTTGGTATTCC 289

Query 286 GGGGGGCATGCCTGTTCGAGCGTCATTACACCACTCAAGCCTGGCTTGGTATTGAGCGAC 345

|||||||||||||||||||||||||||||||||||||||||||||||||||||| ||| |

Sbjct 290 GGGGGGCATGCCTGTTCGAGCGTCATTACACCACTCAAGCCTGGCTTGGTATTGGGCGTC 349

Query 346 CGCGGCCTGCCCGCGCGCTCCAATGTCTCCGGCTGAGCCGTCCGT-CTCTAAGCGTTGTG 404

|||||| ||| |||||| ||| ||||||||||| | | || ||||||||||||||

Sbjct 350 -GCGGCC-GCC-GCGCGCCTCAAAGTCTCCGGCTGGGTC-TCTTACCTCTAAGCGTTGTG 405

Query 405 A-ATAG-CGATC-GCTT-GCGAGGCCCGGGCGGTTCGACGCCGTTAAAcccccccATTTT 460

| | | | ||| |||| ||||| || ||| || ||||||||||| |||||

Sbjct 406 ACACAATCTATCCGCTTCGCGAGTGT-GG-CGGCCCG-CGCCGTTAAACG-----ATTTT 457

Query 461 --CT-ATGGTGACCGCGGATCAGGTAGG 485

|| ||| ||||| |||||||||||||

Sbjct 458 ATCTGATGTTGACCTCGGATCAGGTAGG 485

>Elasticomyces elasticus CBS 122538 ITS region; from TYPE material

Sequence ID: NR_137023.1 Length: 532

Range 1: 32 to 499

Score:477 bits(258), Expect:8e-135,

Identities:413/485(85%), Gaps:21/485(4%), Strand: Plus/Plus

Query 5 CGAGTGTGGCGCTCCGGCGCCTCCCTCCAACCCCATGTCGAAACGACTCTGTTGCCTCGG 64

|||||| || |||||| || ||||||||||||||| || |||| ||||||||||||

Sbjct 32 CGAGTGAGGGCCTCCGGGTCCGACCTCCAACCCCATGT-TAACCGACCCTGTTGCCTCGG 90

Query 65 GGGCGACCCGGCCTTCGGGCGTCGGGGCCCCCGGCGGACACCTTCATAACTCTTGCATCT 124

||||||||||| || || || ||||||||||| |||| ||||| ||| | |||||||

Sbjct 91 GGGCGACCCGGACT-CGTGC--CGGGGCCCCCGATGGAC--CTTCA-AACAC-TGCATCT 143

Query 125 CTTGCGTCTGAGT-GATACATATAATCAATCAAAACTTTCAACAACGGATCTCTTGGTTC 183

||||||| |||| ||| | ||| |||||||||||||||||||||||||||||||||

Sbjct 144 -TTGCGTCCGAGTCAATATTTTGAATAAATCAAAACTTTCAACAACGGATCTCTTGGTTC 202

Query 184 TGGCATCGATGAAGAACGCAGCGAAATGCGATAAGTAATGTGAATTGCAGAATTCAGTGA 243

||||||||||||||||||||||||||||||||||||||||||||||||||||||||||||

Sbjct 203 TGGCATCGATGAAGAACGCAGCGAAATGCGATAAGTAATGTGAATTGCAGAATTCAGTGA 262

Query 244 ATCATCGAATCTTTGAACGCACATTGCGCCCCCTGGCATTCCGGGGGGCATGCCTGTTCG 303

||||||||||||||||||||||||||||||| | || |||||||||||||||||||||||

Sbjct 263 ATCATCGAATCTTTGAACGCACATTGCGCCCTCCGGTATTCCGGGGGGCATGCCTGTTCG 322

Query 304 AGCGTCATTACACCACTCAAGCCTGGCTTGGTATTGAGCGACCGCGGCCTGCCCGCGCGC 363

||||||||| |||||||||||||| ||||||| ||| |||| ||||| | | ||||||||

Sbjct 323 AGCGTCATTTCACCACTCAAGCCTAGCTTGGTCTTGGGCGATCGCGGTCCG-CCGCGCGC 381

Query 364 TCCAATGTCTCCGGCTGAGCCGTCCGTCTCTAAGCGTTGTGAATAGCGA--TCGCTTGCG 421

|||||||||||||||||| || ||||||| |||||||||| | | | |||||||||

Sbjct 382 CCCAATGTCTCCGGCTGAG-CGACCGTCTCGAAGCGTTGTGGTAACCCAAATCGCTTGCG 440

Query 422 -AGGCCCGGGCGGTTCGACGCCGTTAAAcccccccATTTTCTATGGTGACCGCGGATCAG 480

|| | || | || | |||||||||| ||||||| | | | ||||| ||||||||

Sbjct 441 GAGTGC-GGAAGTTTGG--GCCGTTAAACACCCCCATA--C-AGGTTGACCTCGGATCAG 494

Query 481 GTAGG 485

|||||

Sbjct 495 GTAGG 499

>Acrodontium neolitseae CBS 137975 ITS region; from TYPE material

Sequence ID: NR_168148.1 Length: 550

Range 1: 67 to 513

Score:475 bits(257), Expect:3e-134,

Identities:400/465(86%), Gaps:25/465(5%), Strand: Plus/Plus

Query 28 CCTCCAACCCCATGTCGAAACGACTCTGTTGCCTCGGGGGCGACCCGGC-CTTCGGGCGT 86

|||||||||| ||| | ||||||||||||||||||||||||||||| |||| ||||

Sbjct 67 CCTCCAACCCATTGTTG-TCCGACTCTGTTGCCTCGGGGGCGACCCGGCGCTTC-GGCGC 124

Query 87 C--GGGGCCCCCGGCGGACACCTTCATAACTCTTGCATCTCTTGCGTCTGAGTGATACAT 144

| |||| ||||| || || || ||||| ||||||| |||||||||||| | ||||

Sbjct 125 CAGGGGGTCCCCGCTGG--TCC-ACACAACTC-TGCATCT-TTGCGTCTGAGT-AAACAT 178

Query 145 ATAATCAATCAAAACTTTCAACAACGGATCTCTTGGTTCTGGCATCGATGAAGAACGCAG 204

||| || |||||||||||||||||||||||||||||||||||||||||||||||||||

Sbjct 179 TAAATGAAACAAAACTTTCAACAACGGATCTCTTGGTTCTGGCATCGATGAAGAACGCAG 238

Query 205 CGAAATGCGATAAGTAATGTGAATTGCAGAATTCAGTGAATCATCGAATCTTTGAACGCA 264

||||||||||||||||||||||||||||||||||||||||||||||||||||||||||||

Sbjct 239 CGAAATGCGATAAGTAATGTGAATTGCAGAATTCAGTGAATCATCGAATCTTTGAACGCA 298

Query 265 CATTGCGCCCCCTGGCATTCCGGGGGGCATGCCTGTTCGAGCGTCATTACACCACTCAAG 324

||||||||||||||||||||||||||||||||||||||||||||||||||||||||||||

Sbjct 299 CATTGCGCCCCCTGGCATTCCGGGGGGCATGCCTGTTCGAGCGTCATTACACCACTCAAG 358

Query 325 CCTGGCTTGGTATTG-AGCGACCGCGGCCTGCCCGCGCGCTCC-AATGTCTCCGGCTGAG 382

||||||||||||||| || | | |||| | ||| |||| |||| |||||| ||||| |||

Sbjct 359 CCTGGCTTGGTATTGGAG-GTC-GCGGTCCGCC-GCGC-CTCCTAATGTCGCCGGCCGAG 414

Query 383 CCGTCCGTCTCTAAGCGTTGTGAA-TAGCGA-TCGCTTGCGAGGCCCGGGCGGTTCGACG 440

|||| |||||| ||||||||||| | | |||||| |||| | || ||| || ||

Sbjct 415 TCGTCTGTCTCTGAGCGTTGTGAACCTTCAATTCGCTTACGAGTACAGG-CGGCGCG-CG 472

Query 441 CCGTTAAAcccccccATTTTCTATGGTGACCGCGGATCAGGTAGG 485

|||||||||| | ||||| | | ||||| |||||||||||||

Sbjct 473 CCGTTAAACCTCT---TTTTC-AGGTTGACCTCGGATCAGGTAGG 513

>Parateratosphaeria persoonii CBS 122895 ITS region; from TYPE material

Sequence ID: NR_145096.1 Length: 629

Range 1: 144 to 609

Score:475 bits(257), Expect:3e-134,

Identities:411/483(85%), Gaps:20/483(4%), Strand: Plus/Plus

Query 6 GAGTGTGGCGCTCCGGCGCCTCCCTCCAACCCCAT-GTCGAAACGACTCTGTTGCCTCGG 64

||||| || |||||| || ||||||||||||| || |||| | ||||||||||

Sbjct 144 GAGTGAGGGCCTCCGGGCCCGACCTCCAACCCCATTGT-TTTCCGACCCAGTTGCCTCGG 202

Query 65 GGGCGACCCGGCCTTCGGGCGTCGGGGCCCCCGGCGGACACC-TTCATAACTCTTGCATC 123

||| |||||||||||||||| | |||||||||| |||| || ||| ||| | ||||||

Sbjct 203 GGGTGACCCGGCCTTCGGGC--CAGGGCCCCCGGTGGACCCCAATCA-AAC-CCTGCATC 258

Query 124 TCTTGCGTCTGAGTGATACATATAATCAATCAAAACTTTCAACAACGGATCTCTTGGTTC 183

|| |||||||||||||| | ||||||||||||||||||||||||||||||||||| |

Sbjct 259 TC-TGCGTCTGAGTGAT-TAGCGAATCAATCAAAACTTTCAACAACGGATCTCTTGGTAC 316

Query 184 TGGCATCGATGAAGAACGCAGCGAAATGCGATAAGTAATGTGAATTGCAGAATTCAGTGA 243

||||||||||||||||||||||||||||||||||||||||||||||||||||||||||||

Sbjct 317 TGGCATCGATGAAGAACGCAGCGAAATGCGATAAGTAATGTGAATTGCAGAATTCAGTGA 376

Query 244 ATCATCGAATCTTTGAACGCACATTGCGCCCCCTGGCATTCCGGGGGGCATGCCTGTTCG 303

||||||||||||||||||||||||||||||||||||||||||||||||||||||||||||

Sbjct 377 ATCATCGAATCTTTGAACGCACATTGCGCCCCCTGGCATTCCGGGGGGCATGCCTGTTCG 436

Query 304 AGCGTCATTACACCACTCAAGCCTGGCTTGGTATTGAGCGACCGCGGCCTGCCCGCGCGC 363

|||||||||||||||||||||||||||||||||||| ||| | |||| | ||||||||

Sbjct 437 AGCGTCATTACACCACTCAAGCCTGGCTTGGTATTGGGCGTC-GCGGGA-GACCGCGCGC 494

Query 364 TCCAATGTCTCCGGCTGAGCCGTCCGTCTCTAAGCGTTGTGAATAGCGAT-CGCTTGCGA 422

||| ||| ||||||| ||||||||||| |||||||||| | | || ||| ||||

Sbjct 495 CTCAAAGTCACCGGCTGGACCGTCCGTCTCCAAGCGTTGTGGCAA-CTATCCGCGAGCGA 553

Query 423 GGCCCGGGCGGTTCGACGCCGTTAAAcccccccATTTTCTATGGTGACCGCGGATCAGGT 482

| |||||||| || |||||||||| | ||| | | | ||||| ||||||||||

Sbjct 554 GACCCGGGCGACCCG--GCCGTTAAACTTC---ATT--CAAGGTTGACCTCGGATCAGGT 606

Query 483 AGG 485

|||

Sbjct 607 AGG 609

>Teratosphaericola ellenclarkiae BRIP 72385b ITS region; from TYPE material

Sequence ID: NR_182629.1 Length: 592

Range 1: 115 to 496

Score:473 bits(256), Expect:1e-133,

Identities:350/393(89%), Gaps:16/393(4%), Strand: Plus/Plus

Query 18 CCGGCGCCTCCCTCCAACCCCATGTCGAAAC--GACTCTGTTGCCTCGGGGGCGACCCGG 75

||||| || |||||||||| ||| ||| | ||| |||||||||||||||||||||||

Sbjct 115 CCGGC-CCGACCTCCAACCCTTTGT-GAATCTTGACCCTGTTGCCTCGGGGGCGACCCGG 172

Query 76 CCTTCGGGCGTCGGGGCCCCCGGCGGACACCTTCATAACTCTTGCATCTCTTGCGTCTGA 135

|||||||||||||||||||||||||||| | || ||||| |||||| ||||||||||

Sbjct 173 CCTTCGGGCGTCGGGGCCCCCGGCGGACCAC-TC--AACTC-TGCATC-ATTGCGTCTGA 227

Query 136 GTGATACATAT-AAT-CAATCAAAACTTTCAACAACGGATCTCTTGGTTCTGGCATCGAT 193

|| | |||| ||| |||||||||||||||||||||||||||||||||||||||||||

Sbjct 228 GT-CTTTATATGAATAAAATCAAAACTTTCAACAACGGATCTCTTGGTTCTGGCATCGAT 286

Query 194 GAAGAACGCAGCGAAATGCGATAAGTAATGTGAATTGCAGAATTCAGTGAATCATCGAAT 253

||||||||||||||||||||||||||||||||||||||||||||||||||||||||||||

Sbjct 287 GAAGAACGCAGCGAAATGCGATAAGTAATGTGAATTGCAGAATTCAGTGAATCATCGAAT 346

Query 254 CTTTGAACGCACATTGCGCCCCCTGGCATTCCGGGGGGCATGCCTGTTCGAGCGTCATTA 313

|||||||||||||||||||||| ||| |||||||||||||||||||||||||||||||||

Sbjct 347 CTTTGAACGCACATTGCGCCCCTTGGTATTCCGGGGGGCATGCCTGTTCGAGCGTCATTA 406

Query 314 CACCACTCAAGCCTGGCTTGGTATTGAGCGACCGCGGCCTGCCCGCGCGCTCCAATGTCT 373

|||||||||||||||||||||||||| ||| |||||||| ||| |||||| || ||||

Sbjct 407 CACCACTCAAGCCTGGCTTGGTATTGGGCG-CCGCGGCC-GCC-GCGCGCCTTAAAGTCT 463

Query 374 CCGGCTGAGCCGTCCGTCTCTAA-GCGTTGTGA 405

||||||| | | | | ||| || |||||||||

Sbjct 464 CCGGCTGGGTCTTTCACCTCAAAAGCGTTGTGA 496

>Teratosphaeria foliensis CBS 124581 ITS region; from TYPE material

Sequence ID: NR_137818.1 Length: 489

Range 1: 36 to 453

Score:473 bits(256), Expect:1e-133,

Identities:378/433(87%), Gaps:24/433(5%), Strand: Plus/Plus

Query 28 CCTCCAACCCCATGT---CGAAACGACTCTGTTGCCTCGGGGGCGACCCGGCCTTCGGGC 84

||||||||||||||| | |||| | |||||||||||||||||||||||| | ||

Sbjct 36 CCTCCAACCCCATGTTTTCCAAAC--C-ATGTTGCCTCGGGGGCGACCCGGCC-AC-CGC 90

Query 85 GTCGGGGCCCCCGGCGGACACCTTCATAACTCTTGCATCTCTTGCGTCTGAGTGA-TACA 143

| ||||||||||||||||| || || ||||| ||||||| |||||||||||| | | |

Sbjct 91 GCCGGGGCCCCCGGCGGAC-CCCTC--AACTC-TGCATCT-TTGCGTCTGAGTCACAAAA 145

Query 144 TATAATCAATCAAAACTTTCAACAACGGATCTCTTGGTTCTGGCATCGATGAAGAACGCA 203

|| |||||||||||||||||||||||||||||||||||||||||||||||||||||||||

Sbjct 146 TAAAATCAATCAAAACTTTCAACAACGGATCTCTTGGTTCTGGCATCGATGAAGAACGCA 205

Query 204 GCGAAATGCGATAAGTAATGTGAATTGCAGAATTCAGTGAATCATCGAATCTTTGAACGC 263

||||||||||||||||||||||||||||||||||||||||||||||||||||||||||||

Sbjct 206 GCGAAATGCGATAAGTAATGTGAATTGCAGAATTCAGTGAATCATCGAATCTTTGAACGC 265

Query 264 ACATTGCGCCCCCTGGCATTCCGGGGGGCATGCCTGTTCGAGCGTCATTACACCACTCAA 323

||||||||||| |||| ||||||| ||||||||||||||||||||||||||||||||| |

Sbjct 266 ACATTGCGCCCTCTGGTATTCCGGAGGGCATGCCTGTTCGAGCGTCATTACACCACTCCA 325

Query 324 GCCTGGCTTGGTATTGAGCGACCGCGGCCTGCCCGCGCGCTCCAATGTCTCCGGCTGAGC 383

|||| ||| ||||||| ||| ||||||||| || |||||| |||||||||||| ||||

Sbjct 326 GCCTCGCTGGGTATTGGGCG-CCGCGGCCT-CC-GCGCGCCTTAATGTCTCCGGCCGAGC 382

Query 384 CGTCCGTCTCTAAGCGTTGTGA-ATAGC-GAT-CGCTTGCGAGGCCCGGGCGGTTCGA-- 438

|| |||||||||||||||||| | | | | | ||||| || || |||| | | |||

Sbjct 383 CGACCGTCTCTAAGCGTTGTGGCACAACTGTTTCGCTTTCG-GGACCGGTCTGG-CGACG 440

Query 439 CGCCGTTAAAccc 451

|||||||||||||

Sbjct 441 CGCCGTTAAACCC 453

>Pseudoteratosphaeria ohnowa ITS region; from TYPE material

Sequence ID: NR_144977.1 Length: 483

Range 1: 9 to 407

Score:473 bits(256), Expect:1e-133,

Identities:361/409(88%), Gaps:18/409(4%), Strand: Plus/Plus

Query 5 CGAGTGTGGCGCTCCGGCGCCTCCCTCCAACCCCATGTCGAAAC-GA-CTCTGTTGCCTC 62

|||||| || |||||||| || ||||||||||||||| ||| | | ||||||||||||

Sbjct 9 CGAGTGAGG-GCTCCGGC-CCGACCTCCAACCCCATGT-GAATCTCACCTCTGTTGCCTC 65

Query 63 GGGGGCGACCCGGCCTTC-GGGCGTCGGGGCCCCCGGCGGACACCTTCATAACTCTTGCA 121

||||| ||||||||| || ||| | ||||||||||||||||| | || ||||| ||||

Sbjct 66 GGGGGTGACCCGGCCCTCTGGGTGCCGGGGCCCCCGGCGGACCAC-TC--AACTC-TGCA 121

Query 122 TCTCTTGCGTCTGAGTGATACATAT-AATC-AATCAAAACTTTCAACAACGGATCTCTTG 179

||| ||||||||||| | | || | |||| |||||||||||||||||||||||||||||

Sbjct 122 TCT-GTGCGTCTGAGT-AAATATTTGAATCAAATCAAAACTTTCAACAACGGATCTCTTG 179

Query 180 GTTCTGGCATCGATGAAGAACGCAGCGAAATGCGATAAGTAATGTGAATTGCAGAATTCA 239

||||||||||||||||||||||||||||||||||||||||||||||||||||||||||||

Sbjct 180 GTTCTGGCATCGATGAAGAACGCAGCGAAATGCGATAAGTAATGTGAATTGCAGAATTCA 239

Query 240 GTGAATCATCGAATCTTTGAACGCACATTGCGCCCCCTGGCATTCCGGGGGGCATGCCTG 299

|||||||||||||||||||||||||||||||||||| ||| |||||||||||||||||||

Sbjct 240 GTGAATCATCGAATCTTTGAACGCACATTGCGCCCCTTGGTATTCCGGGGGGCATGCCTG 299

Query 300 TTCGAGCGTCATTACACCACTCAAGCCTGGCTTGGTATTGAGCGACCGCGGCCT-GC--C 356

||||||||||||| |||||||||||||||||||||||||| |||| ||||| | || |

Sbjct 300 TTCGAGCGTCATTTCACCACTCAAGCCTGGCTTGGTATTGGGCGAG-GCGGCTTCGCGGC 358

Query 357 CGCGCGCTCCAATGTCTCCGGCTGAGCCGTCCGTCTCTAAGCGTTGTGA 405

||| ||| ||| ||||||||||| | | ||||||||||||||||||

Sbjct 359 CGCCCGCCTCAAAGTCTCCGGCTGGACGGATCGTCTCTAAGCGTTGTGA 407

>Acrodontium crateriforme CBS 144.33 ITS region; from TYPE material

Sequence ID: NR_152320.1 Length: 459

Range 1: 2 to 429

Score:473 bits(256), Expect:1e-133,

Identities:386/445(87%), Gaps:24/445(5%), Strand: Plus/Plus

Query 48 CGACTCTGTTGCCTCGGGGGCGACCCGGC-CTTCGGGCGTC--GGGGCCCCCGGCGGACA 104

||||||||||||||||||||||||||||| |||| |||| | |||| ||||| ||

Sbjct 2 CGACTCTGTTGCCTCGGGGGCGACCCGGCGCTTC-GGCGCCAGGGGGTCCCCGCTGG--T 58

Query 105 CCTTCATAACTCTTGCATCTCTTGCGTCTGAGTGATACATATAATCAATCAAAACTTTCA 164

|| || ||||| ||||||| |||||||||||| | |||| ||| || |||||||||||

Sbjct 59 CC-ACACAACTC-TGCATCT-TTGCGTCTGAGT-AAACATTAAATGAAACAAAACTTTCA 114

Query 165 ACAACGGATCTCTTGGTTCTGGCATCGATGAAGAACGCAGCGAAATGCGATAAGTAATGT 224

||||||||||||||||||||||||||||||||||||||||||||||||||||||||||||

Sbjct 115 ACAACGGATCTCTTGGTTCTGGCATCGATGAAGAACGCAGCGAAATGCGATAAGTAATGT 174

Query 225 GAATTGCAGAATTCAGTGAATCATCGAATCTTTGAACGCACATTGCGCCCCCTGGCATTC 284

||||||||||||||||||||||||||||||||||||||||||||||||||||||||||||

Sbjct 175 GAATTGCAGAATTCAGTGAATCATCGAATCTTTGAACGCACATTGCGCCCCCTGGCATTC 234

Query 285 CGGGGGGCATGCCTGTTCGAGCGTCATTACACCACTCAAGCCTGGCTTGGTATTG-AGCG 343

||||||||||||||||||||||||||||||||||||||||||||||||||||||| || |

Sbjct 235 CGGGGGGCATGCCTGTTCGAGCGTCATTACACCACTCAAGCCTGGCTTGGTATTGGAG-G 293

Query 344 ACCGCGGCCTGCCCGCGCGCTCC-AATGTCTCCGGCTGAGCCGTCCGTCTCTAAGCGTTG 402

| |||| | ||| |||| |||| |||||| ||||| ||| |||| ||||| |||||||

Sbjct 294 TC-GCGGTCCGCC-GCGC-CTCCTAATGTCGCCGGCCGAGTCGTCTGTCTCCGAGCGTTG 350

Query 403 TGAATAG-CGA-TCGCTTGCGAGGCCCGGGCGGTTCGACGCCGTTAAAcccccccATTTT 460

||||| | | |||||| |||| | || ||| || |||||||||||| | ||||

Sbjct 351 TGAATCTTCAATTCGCTTTCGAGTACAGG-CGGCGCG-CGCCGTTAAACCTCT---TTTT 405

Query 461 CTATGGTGACCGCGGATCAGGTAGG 485

| | | ||||| |||||||||||||

Sbjct 406 C-AGGTTGACCTCGGATCAGGTAGG 429

>Devriesia shelburniensis DAOM 226676 ITS region; from TYPE material

Sequence ID: NR_111177.1 Length: 448

Range 1: 51 to 438

Score:472 bits(255), Expect:4e-133,

Identities:356/402(89%), Gaps:18/402(4%), Strand: Plus/Plus

Query 54 TGTTGCCTCGGGGGCGACCCGGCCTTCGGGCGTCGGGGCCCCCGGCGGACACCTTCATAA 113

||||||||||||||||||||||||||||||||||||||||||||| || || ||| ||

Sbjct 51 TGTTGCCTCGGGGGCGACCCGGCCTTCGGGCGTCGGGGCCCCCGGTGGCCA-ATTC--AA 107

Query 114 CTCTTGCATCTCTTGCGTCTGAGTGATACATATAATCAATCAAAACTTTCAACAACGGAT 173

||| ||||||| ||||||||| || | | |||||| ||||||||||||||||||||

Sbjct 108 CTC-TGCATCT-GAGCGTCTGAGCGA-ATAGCGAATCAAACAAAACTTTCAACAACGGAT 164

Query 174 CTCTTGGTTCTGGCATCGATGAAGAACGCAGCGAAATGCGATAAGTAATGTGAATTGCAG 233

||||||||||||||||||||||||||||||||||||||||||||||||||||||||||||

Sbjct 165 CTCTTGGTTCTGGCATCGATGAAGAACGCAGCGAAATGCGATAAGTAATGTGAATTGCAG 224

Query 234 AATTCAGTGAATCATCGAATCTTTGAACGCACATTGCGCCCCCTGGCATTCCGGGGGGCA 293

|||||||||||||||||||||||||||||||||||||||||| ||| |||||||||||||

Sbjct 225 AATTCAGTGAATCATCGAATCTTTGAACGCACATTGCGCCCCTTGGTATTCCGGGGGGCA 284

Query 294 TGCCTGTTCGAGCGTCATTACACCACTCAAGCCTGGCTTGGTATTGAGCGACCGCGGCCT 353

|||| ||||||||||||||||||||||||||||||||||||||||| || ||||| | |

Sbjct 285 TGCCCGTTCGAGCGTCATTACACCACTCAAGCCTGGCTTGGTATTGGACG-CCGCG-C-T 341

Query 354 GCCCGCGCGC-TCC-AATGTCTCCGGCTGAGCCGTCCGTCTCTAAGCGTTGTG-AATAGC 410

|| |||||| || ||||| | |||| ||||||||||||||||||||||||| ||| |

Sbjct 342 -CCGGCGCGCGTCTTAATGTGTTCGGCCGAGCCGTCCGTCTCTAAGCGTTGTGCAAT--C 398

Query 411 GATC-GCTTGCGAGGCCCGGGCGGTTCGACGCCGTTAAAccc 451

||| |||||||| | || |||| | |||||||||||||

Sbjct 399 AATCCGCTTGCGATTC--GGTCGGTCCTGCGCCGTTAAACCC 438

>Xenopenidiella rigidophora CBS 314.95 ITS region; from TYPE material

Sequence ID: NR_175015.1 Length: 566

Range 1: 36 to 488

Score:470 bits(254), Expect:1e-132,

Identities:396/463(86%), Gaps:15/463(3%), Strand: Plus/Plus

Query 28 CCTCCAACCCCATGTCGAAACGACTCTGTTGCCTCGGGGGCGACCCGGCCTTCGGGCGTC 87

|||||||||| ||| | |||| ||||||||||||||||||||||||||||||||||

Sbjct 36 CCTCCAACCCTTTGT-AATCCGACCATGTTGCCTCGGGGGCGACCCGGCCTTCGGGCGTC 94

Query 88 GGGGCCCCCGGCGGACACCTTCATAACTCTTGCATCTCTTGCGTCTGAGTGATACATATA 147

||||||||||| |||| || || ||| | ||||||| |||||||||||| | || |

Sbjct 95 GGGGCCCCCGGTGGAC-CCCTC--AACAC-TGCATCT-TTGCGTCTGAGTTTGATATTGA 149

Query 148 ATCAATCAAAACTTTCAACAACGGATCTCTTGGTTCTGGCATCGATGAAGAACGCAGCGA 207

||||||||||||||||||||||||||||||||||||||||||||||||||||||||||||

Sbjct 150 ATCAATCAAAACTTTCAACAACGGATCTCTTGGTTCTGGCATCGATGAAGAACGCAGCGA 209

Query 208 AATGCGATAAGTAATGTGAATTGCAGAATTCAGTGAATCATCGAATCTTTGAACGCACAT 267

||||||||||||||||||||||||||||||||||||||||||||||||||||||||||||

Sbjct 210 AATGCGATAAGTAATGTGAATTGCAGAATTCAGTGAATCATCGAATCTTTGAACGCACAT 269

Query 268 TGCGCCCCCTGGCATTCCGGGGGGCATGCCTGTTCGAGCGTCATTACACCACTCAAGCCT 327

|||||||| ||| ||||||||||||||||||||||||||||||||||||| ||| |||||

Sbjct 270 TGCGCCCCTTGGTATTCCGGGGGGCATGCCTGTTCGAGCGTCATTACACCCCTCCAGCCT 329

Query 328 GGCTTGGTATTGAGCGACCGCGGC--C-T-GCCCGCGCGCTCCAATGTCTCCGGCTGAGC 383

||| | | ||| ||| |||||| | | | | |||||| ||||||| ||||| | |

Sbjct 330 CGCTGGTTGTTGGGCGTCCGCGGATGCATAGTCTGCGCGCCTCAATGTCGCCGGCCGGAC 389

Query 384 CGTCCGTCTCTAAGCGTTGTGAATAGC-GATCGCTTGCGAGGCCCGGGCGGTTCGACGCC 442

|| |||||||||||||||||| || | | ||||||||| ||| |||| || || ||||

Sbjct 390 CGACCGTCTCTAAGCGTTGTGG-TAACAGTTCGCTTGCG-GGCACGGGAGGGACGTCGCC 447

Query 443 GTTAAAcccccccATTTTCTATGGTGACCGCGGATCAGGTAGG 485

|||||||| |||| | | | ||||| |||||||||||||

Sbjct 448 GTTAAACCTTTTCATTC-C-AGGTTGACCTCGGATCAGGTAGG 488

>Catenulostroma corymbiae CPC 19435 ITS region; from TYPE material

Sequence ID: NR_120229.1 Length: 657

Range 1: 173 to 631

Score:470 bits(254), Expect:1e-132,

Identities:401/469(86%), Gaps:21/469(4%), Strand: Plus/Plus

Query 28 CCTCCAACCCCATGTCGAAACGACTCTGTTGCCTCGGGGGCGACCCGGCCTTCGGGCGTC 87

||||| ||||||||| | ||| |||||||||||||||||||||||||||||||||||

Sbjct 173 CCTCCCACCCCATGTTG-TCTGACCCTGTTGCCTCGGGGGCGACCCGGCCTTCGGGCGTC 231

Query 88 GGGGCCCCCGGCGGACACCTTCATAACTCTTGCATCTCTTGCGTCTGAGTGATACATATA 147

||||||||||| |||| | || ||| | |||||| | ||||| |||||| | || |

Sbjct 232 GGGGCCCCCGGTGGAC--C-ACACAAC-CCTGCATC-GTGGCGTCCGAGTGAGATATTGA 286

Query 148 ATCAATCAAAACTTTCAACAACGGATCTCTTGGTTCTGGCATCGATGAAGAACGCAGCGA 207

||||||||||||||||||||||||||||||||||||||||||||||||||||||||||||

Sbjct 287 ATCAATCAAAACTTTCAACAACGGATCTCTTGGTTCTGGCATCGATGAAGAACGCAGCGA 346

Query 208 AATGCGATAAGTAATGTGAATTGCAGAATTCAGTGAATCATCGAATCTTTGAACGCACAT 267

||||||||||||||||||||||||||||||||||||||||||||||||||||||||||||

Sbjct 347 AATGCGATAAGTAATGTGAATTGCAGAATTCAGTGAATCATCGAATCTTTGAACGCACAT 406

Query 268 TGCGCCCCCTGGCATTCCGGGGGGCATGCCTGTTCGAGCGTCATTACACCACTCAAGCCT 327

|||||||| ||| ||||||||||||||||||||||||||||||| ||| | |||||||||

Sbjct 407 TGCGCCCCTTGGTATTCCGGGGGGCATGCCTGTTCGAGCGTCATAACAACCCTCAAGCCT 466

Query 328 GGCTTGGTATTG-AGCGACCGCGG-CCTGCCCG----C-GCGC-TCCA-ATGTCTCCGGC 378

|||||||||||| | | | |||| || |||| | |||| ||| |||||||||||

Sbjct 467 GGCTTGGTATTGGATGGTC-GCGGACCCCCCCGGGGGCCGCGCGTCCCGATGTCTCCGGC 525

Query 379 TGAGCCGTCCGTCTCTAAGCGTTGTGAA-TAGCGAT-CGCTTGCGAGGCCCGGGCGGTTC 436

||| |||||||||| |||||||||| || |||| |||||| || |||||||||| |

Sbjct 526 CGAGTCGTCCGTCTCCGAGCGTTGTGATCTAACGATTCGCTTGGGA-GCCCGGGCGGCGC 584

Query 437 GACGCCGTTAAAcccccccATTTTCTATGGTGACCGCGGATCAGGTAGG 485

|| ||||| |||||| | | | | | | ||||| |||||||||||||

Sbjct 585 GATGCCGTCAAACCCTCTTCTAT-C-AGGTTGACCTCGGATCAGGTAGG 631

>Teratosphaeria brunneotingens CPC 13303 ITS region; from TYPE material

Sequence ID: NR_163274.1 Length: 631

Range 1: 163 to 528

Score:470 bits(254), Expect:1e-132,

Identities:341/380(90%), Gaps:17/380(4%), Strand: Plus/Plus

Query 28 CCTCCAACCCCATGT--CGAAACGACTCTGTTGCCTCGGGGGCGACCCGGCCTTCGGGCG 85

||||||||||||||| | |||| | |||||||||||||||||||||||| | |||

Sbjct 163 CCTCCAACCCCATGTTTCCAAAC--C-ATGTTGCCTCGGGGGCGACCCGGCCATT--GCG 217

Query 86 TCGGGGCCCCCGGCGGACACCTTCATAACTCTTGCATCTCTTGCGTCTGAGTGATACATA 145

|||||||||| | |||| || || ||||| ||||||| |||||||||||| || |||

Sbjct 218 CCGGGGCCCCCAGTGGAC-CCCTC--AACTC-TGCATCT-TTGCGTCTGAGTCAT-GATA 271

Query 146 T-AATCAATCAAAACTTTCAACAACGGATCTCTTGGTTCTGGCATCGATGAAGAACGCAG 204

| ||||||||||||||||||||||||||||||||||||||||||||||||||||||||||

Sbjct 272 TAAATCAATCAAAACTTTCAACAACGGATCTCTTGGTTCTGGCATCGATGAAGAACGCAG 331

Query 205 CGAAATGCGATAAGTAATGTGAATTGCAGAATTCAGTGAATCATCGAATCTTTGAACGCA 264

||||||||||||||||||||||||||||||||||||||||||||||||||||||||||||

Sbjct 332 CGAAATGCGATAAGTAATGTGAATTGCAGAATTCAGTGAATCATCGAATCTTTGAACGCA 391

Query 265 CATTGCGCCCCCTGGCATTCCGGGGGGCATGCCTGTTCGAGCGTCATTACACCACTCAAG 324

|||||||||| |||| ||||||| ||||||||||||||||||||||||||||||||| ||

Sbjct 392 CATTGCGCCCGCTGGTATTCCGGCGGGCATGCCTGTTCGAGCGTCATTACACCACTCCAG 451

Query 325 CCTGGCTTGGTATTGAGCGACCGCGGCCTGCCCGCGCGCTCCAATGTCTCCGGCTGAGCC 384

||| ||| ||||||| ||| ||||||||| || |||||| ||| ||||||||| |||||

Sbjct 452 CCTCGCTGGGTATTGGGCG-CCGCGGCCT-CC-GCGCGCCTCAAAGTCTCCGGCCGAGCC 508

Query 385 GTCCGTCTCTAAGCGTTGTG 404

| ||||||||||||||||||

Sbjct 509 GACCGTCTCTAAGCGTTGTG 528

>Euteratosphaeria verrucosiafricana CPC 11167 ITS region; from TYPE material

Sequence ID: NR_164213.1 Length: 488

Range 1: 13 to 484

Score:470 bits(254), Expect:1e-132,

Identities:410/484(85%), Gaps:15/484(3%), Strand: Plus/Plus

Query 5 CGAGTGTG-GCGCTCCGGCGCCTCCCTCCAACCCCATGTCGAAACGACTCTGTTGCCTCG 63

|||||| | || | |||| ||| |||||||||| ||| | |||| |||||||||

Sbjct 13 CGAGTGCGCGCCCCCCGGGGCCGACCTCCAACCCATTGT-TATCCGACCACGTTGCCTCG 71

Query 64 GGGGCGACCCGGCCTTCGGGCGTCGGGGCCCCCGGCGGACA-CCTTCATAACTCTTGCAT 122

|||||||||||||| | ||| |||||||||||| ||| | || ||| ||| | |||||

Sbjct 72 GGGGCGACCCGGCCGTTTGGCCCCGGGGCCCCCGGTGGAAATCCATCAAAAC-CCTGCAT 130

Query 123 CTCTTGCGTCTGAGTGATACATATAATCAATCAAAACTTTCAACAACGGATCTCTTGGTT 182

|||| |||||||||| | | || ||||||||||||||||||||||||||||||||||||

Sbjct 131 CTCTGGCGTCTGAGT-AGAAATTGAATCAATCAAAACTTTCAACAACGGATCTCTTGGTT 189

Query 183 CTGGCATCGATGAAGAACGCAGCGAAATGCGATAAGTAATGTGAATTGCAGAATTCAGTG 242

||||||||||||||||||||||||||||||||||||||||||||||||||||||||||||

Sbjct 190 CTGGCATCGATGAAGAACGCAGCGAAATGCGATAAGTAATGTGAATTGCAGAATTCAGTG 249

Query 243 AATCATCGAATCTTTGAACGCACATTGCGCCCCCTGGCATTCCGGGGGGCATGCCTGTTC 302

||||||||||||||||||||||||||||||||||||||||||||||||||||||||||||

Sbjct 250 AATCATCGAATCTTTGAACGCACATTGCGCCCCCTGGCATTCCGGGGGGCATGCCTGTTC 309

Query 303 GAGCGTCATTACACCACTCAAGCCTGGCTTGGTATTGAGCGACCGCGGCCTGCCCGCGCG 362

||||||||||||||||||||||||| ||||||||||| | | |||||| | ||||||

Sbjct 310 GAGCGTCATTACACCACTCAAGCCTCGCTTGGTATTGGGGG-CCGCGGGA-GACCGCGCC 367

Query 363 CTCCAATGTCTCCGGCTGAGCCGTCCGTCTCTAAGCGTTGTGAATAGCGAT-CGCTTGCG 421

| || ||| ||||||| ||||||||||||| |||||||| | | || ||| |||

Sbjct 368 CCTTAAAGTCACCGGCTGGACCGTCCGTCTCTACGCGTTGTGGCAA-CTATCCGCGAGCG 426

Query 422 AGGCCCGGGCGGTTCGACGCCGTTAAAcccccccATTTTCTATGGTGACCGCGGATCAGG 481

|| || ||||| || ||||||||||||||| || | | | ||||| |||||||||

Sbjct 427 AGACC-GGGCGACCCG--GCCGTTAAACCCCCC-ATCAT--AGGTTGACCTCGGATCAGG 480

Query 482 TAGG 485

||||

Sbjct 481 TAGG 484

>Constantinomyces patonensis CBS 117950 ITS region; from TYPE material

Sequence ID: NR_164010.1 Length: 471

Range 1: 30 to 459

Score:470 bits(254), Expect:1e-132,

Identities:383/442(87%), Gaps:21/442(4%), Strand: Plus/Plus

Query 28 CCTC-CAACCCCATGTCGAAACGACTCTGTTGCCTCGGGGGCGACCCGGCC-TTC-GGGC 84

|||| ||||||||||| | |||| ||||||||||||||||||||||||| || |||

Sbjct 30 CCTCTCAACCCCATGT-TATCCGACACTGTTGCCTCGGGGGCGACCCGGCCCCTCTGGGT 88

Query 85 GTCGGGGCCCCCGGCGGACACCTTCATAACTCTTGCATCTCTTGCGTCTGAGTGATACAT 144

||||||||||||||||||| | ||| ||| | ||||||| |||||| |||| | |||

Sbjct 89 GTCGGGGCCCCCGGCGGAC--CGTCA-AACGC-TGCATCT-GTGCGTCCGAGT-CT-CAT 141

Query 145 -A-TAATCAATCAAAACTTTCAACAACGGATCTCTTGGTTCTGGCATCGATGAAGAACGC 202

| |||||||||||||||||||||||||||||||||||||| |||||||||||||||||

Sbjct 142 GAGAAATCAATCAAAACTTTCAACAACGGATCTCTTGGTTCTAGCATCGATGAAGAACGC 201

Query 203 AGCGAAATGCGATAAGTAATGTGAATTGCAGAATTCAGTGAATCATCGAATCTTTGAACG 262

||||||||||||||||||||||||||||||||||||||||||||||||||||||||||||

Sbjct 202 AGCGAAATGCGATAAGTAATGTGAATTGCAGAATTCAGTGAATCATCGAATCTTTGAACG 261

Query 263 CACATTGCGCCCCCTGGCATTCCGGGGGGCATGCCTGTTCGAGCGTCATTACACCACTCA 322

|||||||||||| |||| |||||||||||||||||||||||||||||||| ||||||||

Sbjct 262 CACATTGCGCCCTCTGGTATTCCGGGGGGCATGCCTGTTCGAGCGTCATTTCACCACTCC 321

Query 323 AGCCTGGCTTGGTATTGAGCGACCGCGGC-CTGCCCGCGCGCTCCAATGTCTCCGGCTGA 381

||||| ||| || ||| ||| |||| || | ||| |||||| |||||||||||||||||

Sbjct 322 AGCCTCGCTGGGCCTTGGGCG-CCGCCGCTCCGCCGGCGCGCCCCAATGTCTCCGGCTGA 380

Query 382 GCCGTCCGTCTCTAAGCGTTGTG--AATAGCGATC-GCTTGCGAGGCCCGGGCGGTTCGA 438

|||||||||||| |||||||||| || | ||| ||||| | || ||||| || |||

Sbjct 381 GCCGTCCGTCTCAAAGCGTTGTGGCAACT-CAATCCGCTTGTG-GGACCGGG-GGCTCGT 437

Query 439 CGCCGTTAAAcccccccATTTT 460

|||||| ||| | | |||||||

Sbjct 438 CGCCGTCAAAACACACCATTTT 459

>Xenopenidiella nigrescens CBMAI 1943 ITS region; from TYPE material

Sequence ID: NR_164388.1 Length: 533

Range 1: 33 to 472

Score:468 bits(253), Expect:5e-132,

Identities:392/455(86%), Gaps:25/455(5%), Strand: Plus/Plus

Query 6 GAGTGTGGCGCTC-C-GGCGCCTCCCTCCAACCCCATGTCGAAACGACTCTGTTGCCTCG 63

||||| |||||| | |||| | |||||||||| ||| | |||| ||||||||||

Sbjct 33 GAGTG-AGCGCTCTCGGGCG-CGACCTCCAACCCTTTGT-AATCCGACCATGTTGCCTCG 89

Query 64 GGGGCGACCCGGCCTTCGGGCGTCGGGGCCCCCGGCGGACACCTTCATAACTCTTGCATC 123

|||||||||||||||||||||||||||||||||||||||| | | ||||||| ||||||

Sbjct 90 GGGGCGACCCGGCCTTCGGGCGTCGGGGCCCCCGGCGGAC--C-T-ATAACTC-TGCATC 144

Query 124 TCTTGCGTCTGAGTGATACATA-T-AATCAATCAAAACTTTCAACAACGGATCTCTTGGT 181

| |||||||||||| || ||| | |||||||||||||||||||||||||||||||||||

Sbjct 145 T-TTGCGTCTGAGT-AT-GATATTGAATCAATCAAAACTTTCAACAACGGATCTCTTGGT 201

Query 182 TCTGGCATCGATGAAGAACGCAGCGAAATGCGATAAGTAATGTGAATTGCAGAATTCAGT 241

||||||||||||||||||||||||||||||||||||||||||||||||||||||||||||

Sbjct 202 TCTGGCATCGATGAAGAACGCAGCGAAATGCGATAAGTAATGTGAATTGCAGAATTCAGT 261

Query 242 GAATCATCGAATCTTTGAACGCACATTGCGCCCCCTGGCATTCCGGGGGGCATGCCTGTT 301

|||||||||||||||||||||||||||||||||| || |||||||||||||||||||||

Sbjct 262 GAATCATCGAATCTTTGAACGCACATTGCGCCCCTCGGTATTCCGGGGGGCATGCCTGTT 321

Query 302 CGAGCGTCATTACACCACTCAAGCCTGGCTTGGTATTGAGCGACCGCGGCCTGCCC-G-C 359

|||||||||||||||| ||| ||||| ||| | ||||| ||| | |||| ||| | | |

Sbjct 322 CGAGCGTCATTACACCCCTCCAGCCTAGCTGGTTATTGGGCGTC-GCGGA-TGCACAGTC 379

Query 360 -GCGCTCC--AATGTCTCCGGCTGAGCCGTCCGTCTCTAAGCGTTGTGAATAGC-GATCG 415

|||| || |||||| ||||| | ||| |||||||||||||||||| || | | |||

Sbjct 380 TGCGCGCCTTAATGTCGCCGGCCGGACCGACCGTCTCTAAGCGTTGTGG-TAACAGTTCG 438

Query 416 CTTGCGAGGCCCGGGCGGTTCGACGCCGTTAAAcc 450

|||||| ||| |||| || || |||||||||||

Sbjct 439 CTTGCG-GGCACGGGAGGGACGCAGCCGTTAAACC 472

>Xenopenidiella formica CBMAI 1941 ITS region; from TYPE material

Sequence ID: NR_164386.1 Length: 468

Range 1: 71 to 468

Score:468 bits(253), Expect:5e-132,

Identities:359/408(88%), Gaps:15/408(3%), Strand: Plus/Plus

Query 48 CGACTCTGTTGCCTCGGGGGCGACCCGGCCTTCGGGCGTCGGGGCCCCCGGCGGACACCT 107

|||| ||||||||||||||||||||||||||||||||||||||||||||| |||| |

Sbjct 71 CGACCATGTTGCCTCGGGGGCGACCCGGCCTTCGGGCGTCGGGGCCCCCGGTGGAC--C- 127

Query 108 TCATAACTCTTGCATCTCTTGCGTCTGAGTGATACATA-T-AATCAATCAAAACTTTCAA 165

|||||||| ||||||| |||||||||||| || ||| | |||||||||||||||||||

Sbjct 128 -CATAACTC-TGCATCT-TTGCGTCTGAGT-AT-GATATTGAATCAATCAAAACTTTCAA 182

Query 166 CAACGGATCTCTTGGTTCTGGCATCGATGAAGAACGCAGCGAAATGCGATAAGTAATGTG 225

||||||||||||||||||||||||||||||||||||||||||||||||||||||||||||

Sbjct 183 CAACGGATCTCTTGGTTCTGGCATCGATGAAGAACGCAGCGAAATGCGATAAGTAATGTG 242

Query 226 AATTGCAGAATTCAGTGAATCATCGAATCTTTGAACGCACATTGCGCCCCCTGGCATTCC 285

|||||||||||||||||||||||||||||||||||||||||||||||||| ||| |||||

Sbjct 243 AATTGCAGAATTCAGTGAATCATCGAATCTTTGAACGCACATTGCGCCCCTTGGTATTCC 302

Query 286 GGGGGGCATGCCTGTTCGAGCGTCATTACACCACTCAAGCCTGGCTTGGTATTGAGCGAC 345

| |||||||||||||||||||||||||||||| ||| ||||| ||| ||||||| ||| |

Sbjct 303 GAGGGGCATGCCTGTTCGAGCGTCATTACACCCCTCCAGCCTCGCTGGGTATTGGGCGTC 362

Query 346 C-GCGGC-CTGCCCGCGCGCTCCAATGTCTCCGGCTGAGCCGTCCGTCTCTAAGCGTTGT 403

| |||| | | |||||| |||||| ||||| | ||| |||||||||||||||||

Sbjct 363 CCGCGGAGCAATCTGCGCGCCTTAATGTCGCCGGCCGGACCGACCGTCTCTAAGCGTTGT 422

Query 404 GAATAGC-GATCGCTTGCGAGGCCCGGGCGGTTCGACGCCGTTAAAcc 450

| || | | ||||||||| ||| |||| || || ||||||||||||

Sbjct 423 GG-TAACAGTTCGCTTGCG-GGCACGGGAGGGACGTCGCCGTTAAACC 468

>Caeliomyces tampanus CBS 148275 ITS region; from TYPE material

Sequence ID: NR_175224.1 Length: 531

Range 1: 57 to 506

Score:468 bits(253), Expect:5e-132,

Identities:399/466(86%), Gaps:24/466(5%), Strand: Plus/Plus

Query 28 CCTCCAACCCCATGTCGAAACGACTCTGTTGCCTCGGGGGCGACCCGGCCTTCGGGCGTC 87

||||||||||||||| | |||||||||||||||||||||||||||||| || ||| |

Sbjct 57 CCTCCAACCCCATGTTG-TCCGACTCTGTTGCCTCGGGGGCGACCCGGCCGTCTGGC-TG 114

Query 88 GGGGCCCCCGGCGGACACCTTCATAACTCTTGCATCTCTTGCGTCTGAGTGATACA-TAT 146

|||||||||| || || |||| ||||| ||||| || |||||||||| ||| | | |

Sbjct 115 CGGGCCCCCGGTGGTCA-ATTCA-AACTC-TGCAT-TCAAGCGTCTGAGT-ATAAATTTT 169

Query 147 --AATCAATCAAAACTTTCAACAACGGATCTCTTGGTTCTGGCATCGATGAAGAACGCAG 204

||||||||||||||||||||||||||||||||||||||||||||||||||||||||||

Sbjct 170 GAAATCAATCAAAACTTTCAACAACGGATCTCTTGGTTCTGGCATCGATGAAGAACGCAG 229

Query 205 CGAAATGCGATAAGTAATGTGAATTGCAGAATTCAGTGAATCATCGAATCTTTGAACGCA 264

||||||||||||||||||||||||||||||||||||||||||||||||||||||||||||

Sbjct 230 CGAAATGCGATAAGTAATGTGAATTGCAGAATTCAGTGAATCATCGAATCTTTGAACGCA 289

Query 265 CATTGCGCCCCCTGGCATTCCGGGGGGCATGCCTGTTCGAGCGTCATTACACCACTCAAG 324

||||||||||| ||| |||||| ||||||||||||||||||||||||||||||| |||||

Sbjct 290 CATTGCGCCCCTTGGTATTCCGAGGGGCATGCCTGTTCGAGCGTCATTACACCAATCAAG 349

Query 325 CCTGGCTTGGTATTGAGCGACCGCGGCCTGCCCGCGCGCTCCAATGTCTCCGGCTGAGCC 384

||||||||||||||| ||||| |||| ||||||||| ||||||| |||||| |||

Sbjct 350 CCTGGCTTGGTATTGGGCGAC-GCGGGTCCCCCGCGCGCCTCAATGTCCTCGGCTGGGCC 408

Query 385 GTCCGTCTCTAAGCGTTGTGA--ATAGCGATCGCTTGCGAGGCCCGGGCGGTT-CGACGC 441

||||| ||| |||||| |||| || | ||||| |||| |||||| | || |||

Sbjct 409 GTCCGCCTCGAAGCGTCGTGATCATT-CATTCGCTCCGGAGGGTTGGGCGGCTGCG-CGC 466

Query 442 CGTTAAAcccccccATTTT-CTATGG-TGACCGCGGATCAGGTAGG 485

|||||||| ||||| ||| || ||||| |||||||||||||

Sbjct 467 CGTTAAAC------ATTTTTCTAAGGTTGACCTCGGATCAGGTAGG 506

>Myrtapenidiella pleurocarpae ITS region; from TYPE material

Sequence ID: NR_155414.1 Length: 535

Range 1: 49 to 511

Score:466 bits(252), Expect:2e-131,

Identities:405/476(85%), Gaps:21/476(4%), Strand: Plus/Plus

Query 18 CCGGCGCCTCCCTCCAACCCCATGTCGAAACGA-CTCTGTTGCCTCGGGGGCGACCCGGC 76

||||| || ||||||||||||||| ||| ||||||||||||||||||||||||||

Sbjct 49 CCGGC-CCGACCTCCAACCCCATGT-TTTCCGACCTCTGTTGCCTCGGGGGCGACCCGGC 106

Query 77 CTTCGGGCGTCGGGGCCCCCGGCGGACACCTTCATAACTCTTGCATCTCTTGCGTCTGAG 136

| || ||| |||||||||| |||||| || | ||| | ||||| | ||||||||||

Sbjct 107 CCTCCGGC--CGGGGCCCCCCGCGGACCCCAACCAAAC-CCTGCAT-ACCTGCGTCTGAG 162

Query 137 T-GATACATATAATCAATCAAAACTTTCAACAACGGATCTCTTGGTTCTGGCATCGATGA 195

| || ||| | |||||||||||||||||||||||||||||||||||||||||||||||

Sbjct 163 TCAATTGATAAATTCAATCAAAACTTTCAACAACGGATCTCTTGGTTCTGGCATCGATGA 222

Query 196 AGAACGCAGCGAAATGCGATAAGTAATGTGAATTGCAGAATTCAGTGAATCATCGAATCT 255

||||||||||||||||||||||||||||||||||||||||||||||||||||||||||||

Sbjct 223 AGAACGCAGCGAAATGCGATAAGTAATGTGAATTGCAGAATTCAGTGAATCATCGAATCT 282

Query 256 TTGAACGCACATTGCGCCCCCTGGCATTCCGGGGGGCATGCCTGTTCGAGCGTCATTACA 315

||||||||||||||||||| |||||||||| ||||||||||||||||||||||| |||

Sbjct 283 TTGAACGCACATTGCGCCCGGTGGCATTCCGCCGGGCATGCCTGTTCGAGCGTCATCACA 342

Query 316 CCACTCAAGCCTGGCTTGGTATTGAGCGACCGCGGCCTGCCCGCGCGC-TCCAATGTCTC 374

|||||| ||||||||| ||||||| ||| ||||| | ||||||||| || || |||||

Sbjct 343 CCACTCCAGCCTGGCTGGGTATTGGGCGT-CGCGGTGTCCCCGCGCGCCTCGAA-GTCTC 400

Query 375 CGGCTGAGCCGTCCGTCTC-TAAGCGTTGTGAAT-AGCGATC-GCTTGCGAG-GCCCGGG 430

|||| |||||||||||||| |||||||||||| | | | | | ||||||||| || |||

Sbjct 401 CGGCCGAGCCGTCCGTCTCATAAGCGTTGTGATTCATCAAGCCGCTTGCGAGTGCGGGGG 460

Query 431 -CGGTTCGACGCCGTTAAAcccccccATTTTCTATGGTGACCGCGGATCAGGTAGG 485

| || || ||||||||||| || || | | | | ||||| |||||||||||||

Sbjct 461 GCCGT-CG-CGCCGTTAAACGACC--ATCT-CAAGGTTGACCTCGGATCAGGTAGG 511

>Teratosphaeria stellenboschiana CBS 116428 ITS region; from TYPE material

Sequence ID: NR_175014.1 Length: 486

Range 1: 34 to 450

Score:466 bits(252), Expect:2e-131,

Identities:376/432(87%), Gaps:23/432(5%), Strand: Plus/Plus

Query 28 CCTCCAACCCCATGT-CGAAACGACTCTGTTGCCTCGGGGGCGACCCGGCCTTCGGGCGT 86

||||||||||||||| ||| | |||||||||||||||||||||||| | |||

Sbjct 34 CCTCCAACCCCATGTTTTCAAC--C-ATGTTGCCTCGGGGGCGACCCGGCC-AC-CGCGC 88

Query 87 CGGGGCCCCCGG-CGGACACCTTCATAACTCTTGCATCTCTTGCGTCTGAGTGA-TACAT 144

|||||||||||| ||||| || || ||||| |||||||| ||||||||||| | | ||

Sbjct 89 CGGGGCCCCCGGGCGGAC-CCCTC--AACTC-TGCATCTC-TGCGTCTGAGTCACAAAAT 143

Query 145 ATAATCAATCAAAACTTTCAACAACGGATCTCTTGGTTCTGGCATCGATGAAGAACGCAG 204

| ||||||||||||||||||||||||||||||||||||||||||||||||||||||||||

Sbjct 144 AAAATCAATCAAAACTTTCAACAACGGATCTCTTGGTTCTGGCATCGATGAAGAACGCAG 203

Query 205 CGAAATGCGATAAGTAATGTGAATTGCAGAATTCAGTGAATCATCGAATCTTTGAACGCA 264

||||||||||||||||||||||||||||||||||||||||||||||||||||||||||||

Sbjct 204 CGAAATGCGATAAGTAATGTGAATTGCAGAATTCAGTGAATCATCGAATCTTTGAACGCA 263

Query 265 CATTGCGCCCCCTGGCATTCCGGGGGGCATGCCTGTTCGAGCGTCATTACACCACTCAAG 324

|||||||||| |||| ||||||| ||||||||||||||||||||||||||||||||| ||

Sbjct 264 CATTGCGCCCTCTGGTATTCCGGAGGGCATGCCTGTTCGAGCGTCATTACACCACTCCAG 323

Query 325 CCTGGCTTGGTATTGAGCGACCGCGGCCTGCCCGCGCGCTCCAATGTCTCCGGCTGAGCC 384

||| ||| ||||||| ||| ||||||||| || |||||| |||||||||||| |||||

Sbjct 324 CCTCGCTGGGTATTGGGCG-CCGCGGCCT-CC-GCGCGCCTTAATGTCTCCGGCCGAGCC 380

Query 385 GTCCGTCTCTAAGCGTTGTGA-ATAGC-GAT-CGCTTGCGAGGCCCGGGCGGTTCGA--C 439

| |||||||||||||||||| | | | | | ||||| || || |||| | | ||| |

Sbjct 381 GACCGTCTCTAAGCGTTGTGGCACAACTGTTTCGCTTTCG-GGACCGGTCTGG-CGACGC 438

Query 440 GCCGTTAAAccc 451

||||||||||||

Sbjct 439 GCCGTTAAACCC 450

>Teratosphaeria terminaliae ITS region; from TYPE material

Sequence ID: NR_137841.1 Length: 644

Range 1: 164 to 547

Score:466 bits(252), Expect:2e-131,

Identities:351/396(89%), Gaps:18/396(4%), Strand: Plus/Plus

Query 28 CCTCCAACCCCATGT--CGAAACGACTCTGTTGCCTCGGGGGCGACCCGGCCTTCGGGCG 85

||||||||||||||| | |||| | | |||||||||||||||||||||||| | |||

Sbjct 164 CCTCCAACCCCATGTTTCCAAAC--CAC-GTTGCCTCGGGGGCGACCCGGCCT-C--GCG 217

Query 86 TCGGGGCCCCCGGCGGACACCTTCATAACTCTTGCATCTCTTGCGTCTGAGTGATACATA 145

||||||||||||||||||| | ||| | ||||||| |||||||||||| || |||

Sbjct 218 CCGGGGCCCCCGGCGGACACAAACCAAACAC-TGCATCT-TTGCGTCTGAGT-CTAAATA 274

Query 146 T-AATCAATCAAAACTTTCAACAACGGATCTCTTGGTTCTGGCATCGATGAAGAACGCAG 204

| ||||||||||||||||||||||||||||||||||||||||||||||||||||||||||

Sbjct 275 TAAATCAATCAAAACTTTCAACAACGGATCTCTTGGTTCTGGCATCGATGAAGAACGCAG 334

Query 205 CGAAATGCGATAAGTAATGTGAATTGCAGAATTCAGTGAATCATCGAATCTTTGAACGCA 264

||||||||||||||||||||||||||||||||||||||||||||||||||||||||||||

Sbjct 335 CGAAATGCGATAAGTAATGTGAATTGCAGAATTCAGTGAATCATCGAATCTTTGAACGCA 394

Query 265 CATTGCGCCCCCTGGCATTCCGGGGGGCATGCCTGTTCGAGCGTCATTACACCACTCAAG 324

|||||||||| |||| ||||||| ||||||||||||||||||||||||||||||||| ||

Sbjct 395 CATTGCGCCCTCTGGTATTCCGGAGGGCATGCCTGTTCGAGCGTCATTACACCACTCCAG 454

Query 325 CCTGGCTTGGTATTGAGCGACCGCGGCCTGCCCGCGCGCTCCAATGTCTCCGGCTGAGCC 384

||| ||| ||||||| ||| | ||||||| || |||||| |||||||||||| |||||

Sbjct 455 CCTCGCTGGGTATTGGGCGTC-GCGGCCT-CC-GCGCGCCTTAATGTCTCCGGCCGAGCC 511

Query 385 GTCCGTCTCT-AAGCGTTGTGA-ATAGCGA-TCGCT 417

| ||||||| ||||||||||| || ||| |||||

Sbjct 512 GACCGTCTCCGAAGCGTTGTGACATCACGAATCGCT 547

>Teratosphaeria encephalarti CPC 14886 ITS region; from TYPE material

Sequence ID: NR_137022.1 Length: 638

Range 1: 161 to 589

Score:466 bits(252), Expect:2e-131,

Identities:380/438(87%), Gaps:23/438(5%), Strand: Plus/Plus

Query 28 CCTCCAACCCCATGTCGAAACGACTCTGTTGCCTCGGGGGCGACCCGGC--CTTCGGGCG 85

||||||||||||||| | |||| |||||||||||||| |||||||| |||||||||

Sbjct 161 CCTCCAACCCCATGT-TATCCGACCATGTTGCCTCGGGGGTGACCCGGCGCCTTCGGGCG 219

Query 86 --TCGGGGCCCCCGGCGGACACCTTCATAACTCTTGCATCTCTTGCGTCTGAGTGATAC- 142

||||||||||||||||| || || ||| | ||||||| ||||||| |||| ||

Sbjct 220 CCCCGGGGCCCCCGGCGGAC-CCCTC--AACGC-TGCATCT-TTGCGTCCGAGT--CACG 272

Query 143 ATATAATCAATCAAAACTTTCAACAACGGATCTCTTGGTTCTGGCATCGATGAAGAACGC 202

|| ||||||||||||||||||||||||||||||||||||||||||||||||||||||||

Sbjct 273 ATTGAATCAATCAAAACTTTCAACAACGGATCTCTTGGTTCTGGCATCGATGAAGAACGC 332

Query 203 AGCGAAATGCGATAAGTAATGTGAATTGCAGAATTCAGTGAATCATCGAATCTTTGAACG 262

||||||||||||||||||||||||||||||||||||||||||||||||||||||||||||

Sbjct 333 AGCGAAATGCGATAAGTAATGTGAATTGCAGAATTCAGTGAATCATCGAATCTTTGAACG 392

Query 263 CACATTGCGCCCCCTGGCATTCCGGGGGGCATGCCTGTTCGAGCGTCATTACACCACTCA 322

||||||||||||| ||| |||||||||||||||||||||||||||||||| |||||||||

Sbjct 393 CACATTGCGCCCCTTGGTATTCCGGGGGGCATGCCTGTTCGAGCGTCATTTCACCACTCA 452

Query 323 AGCCTGGCTTGGTATTGAGCGA-CCGCGGCC-TG-C---CCGCGCGCTCCAATGTCTCCG 376

||||| ||||||||||| |||| |||||||| | | |||||||| || |||||| ||

Sbjct 453 AGCCTCGCTTGGTATTGGGCGATCCGCGGCCGTCTCCGGCCGCGCGCCCCTATGTCTTCG 512

Query 377 GCTGAGCCGTCCGTCTCTAAGCGTTGTGAA-TAGC-GATCGCTTGCGAGGCCCGGGC-GG 433

|| |||||| |||||||| ||||||||| || | | |||||| ||| | |||| ||

Sbjct 513 GCCGAGCCGCCCGTCTCTTAGCGTTGTGGTCTATCAGTTCGCTTTGGAG-CGCGGGTGGG 571

Query 434 TTCGACGCCGTTAAAccc 451

|||| ||||| |||||||

Sbjct 572 TTCGCCGCCGCTAAACCC 589

>Xenopenidiella tarda CBMAI 1940 ITS region; from TYPE material

Sequence ID: NR_164385.1 Length: 541

Range 1: 75 to 504

Score:464 bits(251), Expect:6e-131,

Identities:381/442(86%), Gaps:16/442(3%), Strand: Plus/Plus

Query 48 CGACTCTGTTGCCTCGGGGGCGACCCGGCCTTCGGGCGTCGGGGCCCCCGGCGGACACCT 107

|||| |||||||||||||| |||||||||||||||||||||||||||||| |||| ||

Sbjct 75 CGACCATGTTGCCTCGGGGGTGACCCGGCCTTCGGGCGTCGGGGCCCCCGGTGGAC-CC- 132

Query 108 TCATAACTCTTGCATCTCTTGCGTCTGAGTGATACATA-T-AATCAATCAAAACTTTCAA 165

| ||||||| |||||||| ||||||||||| || ||| | |||||||||||||||||||

Sbjct 133 T-ATAACTC-TGCATCTC-TGCGTCTGAGT-AT-GATATTGAATCAATCAAAACTTTCAA 187

Query 166 CAACGGATCTCTTGGTTCTGGCATCGATGAAGAACGCAGCGAAATGCGATAAGTAATGTG 225

||||||||||||||||||||||||||||||||||||||||||||||||||||||||||||

Sbjct 188 CAACGGATCTCTTGGTTCTGGCATCGATGAAGAACGCAGCGAAATGCGATAAGTAATGTG 247

Query 226 AATTGCAGAATTCAGTGAATCATCGAATCTTTGAACGCACATTGCGCCCCCTGGCATTCC 285

|||||||||||||||||||||||||||||||||||||||||||||||||| || |||||

Sbjct 248 AATTGCAGAATTCAGTGAATCATCGAATCTTTGAACGCACATTGCGCCCCTCGGTATTCC 307

Query 286 GGGGGGCATGCCTGTTCGAGCGTCATTACACCACTCAAGCCTGGCTTGGTATTGAGCGAC 345

|||||||||||||||||||||||||||||||| ||| ||||| ||| ||| ||| || |

Sbjct 308 GGGGGGCATGCCTGTTCGAGCGTCATTACACCCCTCCAGCCTCGCTGGGTTTTGGACGTC 367

Query 346 CGCGGC-CTGCCCGCGCGCTCCAATGTCTCCGGCTGAGCCGTCCGTCTCTAAGCGTTGTG 404

||||| | | |||||| |||||| ||||| | ||| |||||||||||||||||

Sbjct 368 CGCGGAGCAATCTGCGCGCCTTAATGTCGCCGGCCGGACCGACCGTCTCTAAGCGTTGT- 426

Query 405 AATAGC-GATCGCTTGCGAGGCCCGGGCGGTTCGACGCCGTTAAAcccccccATTTTCTA 463

| || | | ||||||||| ||| |||| || || |||||||||| || | || | |

Sbjct 427 AGTAACAGTTCGCTTGCG-GGCACGGGAGGGACGTCGCCGTTAAAACCTCT-ATCA-C-A 482

Query 464 TGGTGACCGCGGATCAGGTAGG 485

| ||||| |||||||||||||

Sbjct 483 GGTTGACCTCGGATCAGGTAGG 504

>Myrtapenidiella eucalyptigena ITS region; from TYPE material

Sequence ID: NR_155412.1 Length: 520

Range 1: 58 to 493

Score:464 bits(251), Expect:6e-131,

Identities:384/446(86%), Gaps:18/446(4%), Strand: Plus/Plus

Query 12 GGCGCTCCGGCGCCTCCCTCCAACCCCATGTCGAAACGA-CTCTGTTGCCTCGGGGGCGA 70

||| ||||||| || ||||||||||||||| ||| ||||||||||||||||||||

Sbjct 58 GGCCCTCCGGC-CCGACCTCCAACCCCATGT-TTTCCGACCTCTGTTGCCTCGGGGGCGA 115

Query 71 CCCGGCCTTCGGGCGTCGGGGCCCCCGGCGGACACCTTCATAACTCTTGCATCTCTTGCG 130

||||||| || ||| |||||||||| | |||| || | ||| | ||||| | ||||

Sbjct 116 CCCGGCCCTCCGGC--CGGGGCCCCCCGTGGACCCCAACCAAAC-CCTGCAT-ACCTGCG 171

Query 131 TCTGAGT-GATACATATAATCAATCAAAACTTTCAACAACGGATCTCTTGGTTCTGGCAT 189

||||||| || ||| | |||||||||||||||||||||||||||||||||||||||||

Sbjct 172 TCTGAGTCAATTGATAAATTCAATCAAAACTTTCAACAACGGATCTCTTGGTTCTGGCAT 231

Query 190 CGATGAAGAACGCAGCGAAATGCGATAAGTAATGTGAATTGCAGAATTCAGTGAATCATC 249

||||||||||||||||||||||||||||||||||||||||||||||||||||||||||||

Sbjct 232 CGATGAAGAACGCAGCGAAATGCGATAAGTAATGTGAATTGCAGAATTCAGTGAATCATC 291

Query 250 GAATCTTTGAACGCACATTGCGCCCCCTGGCATTCCGGGGGGCATGCCTGTTCGAGCGTC 309

||||||||||||||||||||||||| |||||||||| |||||||||||||||||||||

Sbjct 292 GAATCTTTGAACGCACATTGCGCCCGGTGGCATTCCGCCGGGCATGCCTGTTCGAGCGTC 351

Query 310 ATTACACCACTCAAGCCTGGCTTGGTATTGAGCGACCGCGGCCTGCCCGCGCGC-TCCAA 368

|||||||||||| ||||||||| ||||||| ||| ||||| | ||||||||| || ||

Sbjct 352 ATTACACCACTCCAGCCTGGCTGGGTATTGGGCGT-CGCGGTGTCCCCGCGCGCCTCGAA 410

Query 369 TGTCTCCGGCTGAGCCGTCCGTCTC-TAAGCGTTGTGAAT-AGCGATC-GCTTGCGAG-G 424

||||||||| |||||||||||||| |||||||||||| | | | | | ||||||||| |

Sbjct 411 -GTCTCCGGCCGAGCCGTCCGTCTCATAAGCGTTGTGATTCATCAAGCCGCTTGCGAGTG 469

Query 425 CCCGGG-CGGTTCGACGCCGTTAAAc 449

| ||| | || || |||||||||||

Sbjct 470 CGGGGGGCCGT-CG-CGCCGTTAAAC 493

>Parateratosphaeria stirlingiae CPC 29252 ITS region; from TYPE material

Sequence ID: NR_155699.1 Length: 531

Range 1: 36 to 471

Score:464 bits(251), Expect:6e-131,

Identities:384/447(86%), Gaps:13/447(2%), Strand: Plus/Plus

Query 5 CGAGTGTGGCGCTCCGGCGCCTCCCTCCAACCCCAT-GTCGAAACGACTCTGTTGCCTCG 63

|||||| || |||||| || ||||||||||||| || |||| | |||||||||

Sbjct 36 CGAGTGAGGGCCTCCGGGCCCGACCTCCAACCCCATTGT-TTTCCGACCCCGTTGCCTCG 94

Query 64 GGGGCGACCCGGCCTTCGGGCGTCGGGGCCCCCGGCGGACACCTTCATAACTCTTGCATC 123

|||| |||||||| ||| | |||||||||||||| |||| || | ||| | ||||||

Sbjct 95 GGGGTGACCCGGCTTTC--GAGTCGGGGCCCCCGGTGGACCCCAACCAAAC-CCTGCATC 151

Query 124 TCTTGCGTCTGAGTGATACATATAATCAATCAAAACTTTCAACAACGGATCTCTTGGTTC 183

|| |||||||||||||| | ||||||||||||||||||||||||||||||||||| |

Sbjct 152 TC-TGCGTCTGAGTGAT-TAGCGAATCAATCAAAACTTTCAACAACGGATCTCTTGGTAC 209

Query 184 TGGCATCGATGAAGAACGCAGCGAAATGCGATAAGTAATGTGAATTGCAGAATTCAGTGA 243

||||||||||||||||||||||||||||||||||||||||||||||||||||||||||||

Sbjct 210 TGGCATCGATGAAGAACGCAGCGAAATGCGATAAGTAATGTGAATTGCAGAATTCAGTGA 269

Query 244 ATCATCGAATCTTTGAACGCACATTGCGCCCCCTGGCATTCCGGGGGGCATGCCTGTTCG 303

||||||||||||||||||||||||||||||||||||||||||||||||||||||||||||

Sbjct 270 ATCATCGAATCTTTGAACGCACATTGCGCCCCCTGGCATTCCGGGGGGCATGCCTGTTCG 329

Query 304 AGCGTCATTACACCACTCAAGCCTGGCTTGGTATTGAGCGACCGCGGCCTGCCCGCGCGC 363

|||||||||||||||||||||||||||||||||||| ||| | |||| | ||||||||

Sbjct 330 AGCGTCATTACACCACTCAAGCCTGGCTTGGTATTGGGCGTC-GCGGGA-GACCGCGCGC 387

Query 364 TCCAATGTCTCCGGCTGAGCCGTCCGTCTCTAAGCGTTGTGAATAGCGAT-CGCTTGCGA 422

||| ||| ||||||| ||||||||||| |||||||||| | | || ||| ||||

Sbjct 388 CTCAAAGTCACCGGCTGGACCGTCCGTCTCCAAGCGTTGTGGCAA-CTATCCGCGAGCGA 446

Query 423 GGCCCGGGCGGTTCGACGCCGTTAAAc 449

| |||||||| || ||||||||||

Sbjct 447 GACCCGGGCGACCCG--GCCGTTAAAC 471

>Catenulostroma elginense STE-U 1958 ITS region; from TYPE material

Sequence ID: NR_145089.1 Length: 483

Range 1: 20 to 404

Score:464 bits(251), Expect:6e-131,

Identities:350/396(88%), Gaps:14/396(3%), Strand: Plus/Plus

Query 12 GGCGCTCCGGCGCCTCCCTC-CAACCCCATGTCGAAACGACTCTGTTGCCTCGGGGGCGA 70

||| |||||| || |||| ||||||||||| | |||| | ||||||||||||||||

Sbjct 20 GGC-CTCCGGGCCCGACCTCTCAACCCCATGTTG-CCCGACACCGTTGCCTCGGGGGCGA 77

Query 71 CCCGGCCTTCGGGCGTCGGGGCCCCCGGCGGACACCTTCATAACTCTTGCATCTCTTGCG 130

||||||| || |||| |||||||||||| |||| | ||| ||| | |||||| | ||||

Sbjct 78 CCCGGCCCTCCGGCGCCGGGGCCCCCGGTGGAC--CGTCA-AACAC-TGCATC-CGTGCG 132

Query 131 TCTGAGT--GATACATATAATCAATCAAAACTTTCAACAACGGATCTCTTGGTTCTGGCA 188

|| |||| ||| || ||||||||||||||||||||||||||||||||||||||||||

Sbjct 133 TCCGAGTCAGATGATTA-AATCAATCAAAACTTTCAACAACGGATCTCTTGGTTCTGGCA 191

Query 189 TCGATGAAGAACGCAGCGAAATGCGATAAGTAATGTGAATTGCAGAATTCAGTGAATCAT 248

||||||||||||||||||||||||||||||||||||||||||||||||||||||||||||

Sbjct 192 TCGATGAAGAACGCAGCGAAATGCGATAAGTAATGTGAATTGCAGAATTCAGTGAATCAT 251

Query 249 CGAATCTTTGAACGCACATTGCGCCCCCTGGCATTCCGGGGGGCATGCCTGTTCGAGCGT 308

|||||||||||||||||||||||||| |||| ||||||||||||||||||||||||||||

Sbjct 252 CGAATCTTTGAACGCACATTGCGCCCTCTGGTATTCCGGGGGGCATGCCTGTTCGAGCGT 311

Query 309 CATTACACCACTCAAGCCTGGCTTGGTATTGAGCGACCGCGGCCTGCCCGCGCGCTCCAA 368

|||| |||||||| ||||||||| ||||||| ||| |||| || | | |||||| ||||

Sbjct 312 CATTTCACCACTCCAGCCTGGCTGGGTATTGGGCG-CCGCCGCGT-CG-GCGCGCCCCAA 368

Query 369 TGTCTCCGGCTGAGCCGTCCGTCTCTAAGCGTTGTG 404

||||| ||||||||||||||||||| ||||||||||

Sbjct 369 TGTCTTCGGCTGAGCCGTCCGTCTCAAAGCGTTGTG 404

>Petrophila incerta CBS 118608 ITS region; from TYPE material

Sequence ID: NR_144956.1 Length: 463

Range 1: 7 to 402

Score:464 bits(251), Expect:6e-131,

Identities:356/405(88%), Gaps:14/405(3%), Strand: Plus/Plus

Query 5 CGAGTGTGGCGCTCCGGCGCCTC--CCTCCAACCCCATGTCGAAACGACTCTGTTGCCTC 62

|||||| || |||||| | ||| ||||||||||||||||| || || ||||||||

Sbjct 7 CGAGTGAGGGCCTCCGG-G-CTCGACCTCCAACCCCATGTCGTTACAACCACGTTGCCTC 64

Query 63 GGGGGCGACCCGGCCTTCGGGCGTCGGGGCCCCCGGCGGAC---ACCTTCATAACTCTTG 119

|||||||||||||||| | |||||||||||||||| |||| ||| ||| ||||| ||

Sbjct 65 GGGGGCGACCCGGCCT-C-CGCGTCGGGGCCCCCGGTGGACCCAACCATCA-AACTC-TG 120

Query 120 CATCTCTTGCGTCTGAGTGATACATATAATCAATCAAAACTTTCAACAACGGATCTCTTG 179

| ||| ||||||| |||||||| || |||||||||||||||||||||||||||||||||

Sbjct 121 CGTCT-TTGCGTCGGAGTGATAGATTAAATCAATCAAAACTTTCAACAACGGATCTCTTG 179

Query 180 GTTCTGGCATCGATGAAGAACGCAGCGAAATGCGATAAGTAATGTGAATTGCAGAATTCA 239

||||||||||||||||||||||||||||||||||||||||||||||||||||||||||||

Sbjct 180 GTTCTGGCATCGATGAAGAACGCAGCGAAATGCGATAAGTAATGTGAATTGCAGAATTCA 239

Query 240 GTGAATCATCGAATCTTTGAACGCACATTGCGCCCCCTGGCATTCCGGGGGGCATGCCTG 299

|||||||||||||||||||||||||||||||||||| |||||||||| ||||||||||||

Sbjct 240 GTGAATCATCGAATCTTTGAACGCACATTGCGCCCCTTGGCATTCCGAGGGGCATGCCTG 299

Query 300 TTCGAGCGTCATTACACCACTCAAGCCTGGCTTGGTATTGAGCGACCGCGGCCTGCCCGC 359

|||||||||||||||||||||||||||||||||||||||| ||| | | | || ||||

Sbjct 300 TTCGAGCGTCATTACACCACTCAAGCCTGGCTTGGTATTGGGCGTCGGGGTGCTCCCCGT 359

Query 360 GCGCTCCAATGTCTCCGGCTGAGCCGTCCGTCTCTAAGCGTTGTG 404

|| ||| | | || ||||||| ||||||| ||| |||||||||

Sbjct 360 GC-CTCGATT-TCACCGGCTGGACCGTCCGATTCTCAGCGTTGTG 402

>Teratosphaeria gracilis ITS region; from TYPE material

Sequence ID: NR_161146.1 Length: 501

Range 1: 28 to 445

Score:462 bits(250), Expect:2e-130,

Identities:377/434(87%), Gaps:26/434(5%), Strand: Plus/Plus

Query 28 CCTCCAACCCCATGT--CGAAACGACTCTGTTGCCTCGGGGGCGACCCGGCCTTCGGGCG 85

||||||||||||||| | |||| | | ||||||||||||||||||||||| || |||

Sbjct 28 CCTCCAACCCCATGTTTCCAAAC--CAC-GTTGCCTCGGGGGCGACCCGGCCGTCAGGC- 83

Query 86 TCGGGG-CCCCCGGCGGACACCTTCATAACTCTTGCATCTCTTGCGTCTGAGTGATAC-A 143

||||| ||||||| |||| || || ||||| ||||||| |||||||||||| | || |

Sbjct 84 CCGGGGCCCCCCGGTGGAC-CCCTC--AACTC-TGCATCT-TTGCGTCTGAGT-A-ACGA 136

Query 144 TAT-AATCAATCAAAACTTTCAACAACGGATCTCTTGGTTCTGGCATCGATGAAGAACGC 202

|| ||||||||||||||||||||||||||||||||||||||||||||||||||||||||

Sbjct 137 AATAAATCAATCAAAACTTTCAACAACGGATCTCTTGGTTCTGGCATCGATGAAGAACGC 196

Query 203 AGCGAAATGCGATAAGTAATGTGAATTGCAGAATTCAGTGAATCATCGAATCTTTGAACG 262

||||||||||||||||||||||||||||||||||||||||||||||||||||||||||||

Sbjct 197 AGCGAAATGCGATAAGTAATGTGAATTGCAGAATTCAGTGAATCATCGAATCTTTGAACG 256

Query 263 CACATTGCGCCCCCTGGCATTCCGGGGGGCATGCCTGTTCGAGCGTCATTACACCACTCA 322

|||||||||||| |||| | ||||| |||||||||||||||||||||||||||||||||

Sbjct 257 CACATTGCGCCCTCTGGTACTCCGGAGGGCATGCCTGTTCGAGCGTCATTACACCACTCC 316

Query 323 AGCCTGGCTTGGTATTGAGCGACCGCGGCCTGCCCGCGCGCTCCAATGTCTCCGGCTGAG 382

||||| ||| ||||||| ||| | ||||||| || |||||| ||||||||||||| |||

Sbjct 317 AGCCTCGCTGGGTATTGGGCGTC-GCGGCCT-CC-GCGCGCCTCAATGTCTCCGGCCGAG 373

Query 383 CCGTCCGTCTCTAAGCGTTGTGA-ATAGC-GAT-CGCTTGCGAGGCCCGGGCGGTTCGA- 438

||| ||||||| |||||||||| | | | | | ||||| || || |||| | | |||

Sbjct 374 CCGACCGTCTCCAAGCGTTGTGGCACAACTGTTTCGCTTCCG-GGACCGGTCTGG-CGAC 431

Query 439 -CGCCGTTAAAccc 451

|||||||||||||

Sbjct 432 GCGCCGTTAAACCC 445

>Readeriella pseudocallista ITS region; from TYPE material

Sequence ID: NR_157419.1 Length: 630

Range 1: 169 to 619

Score:462 bits(250), Expect:2e-130,

Identities:400/468(85%), Gaps:27/468(5%), Strand: Plus/Plus

Query 28 CCTCCAACCCCATGTCGAAACGACTCTGTTGCCTCGGGGGCGACCCGGCC-TTCGGGCGT 86

||||||||||||||| | |||||||||||||||||||||||||||||| | ||| ||

Sbjct 169 CCTCCAACCCCATGTTG-TCCGACTCTGTTGCCTCGGGGGCGACCCGGCCGTACGGCCG- 226

Query 87 CGGGGCCCCCGGCGGACACCTTCATAACTCTTGCATCTCTTGCGTCTGAGTGATACATAT 146

| |||||||||| |||| | || ||||| ||||||| | |||||||||| || |||

Sbjct 227 C-GGGCCCCCGGTGGACTAC-TC--AACTC-TGCATCT-TAGCGTCTGAGT-TTAATTAT 279

Query 147 -AATCAATCAAAACTTTCAACAACGGATCTCTTGGTTCTGGCATCGATGAAGAACGCAGC 205

||||||| |||||||||||||||||||||||||||||||||||||||||||||||||||

Sbjct 280 AAATCAATTAAAACTTTCAACAACGGATCTCTTGGTTCTGGCATCGATGAAGAACGCAGC 339

Query 206 GAAATGCGATAAGTAATGTGAATTGCAGAATTCAGTGAATCATCGAATCTTTGAACGCAC 265

||||||||||||||||||||||||||||||||||||||||||||||||||||||||||||

Sbjct 340 GAAATGCGATAAGTAATGTGAATTGCAGAATTCAGTGAATCATCGAATCTTTGAACGCAC 399

Query 266 ATTGCGCCCCCTGGCATTCCGGGGGGCATGCCTGTTCGAGCGTCATTACACCACTCAAGC 325

|||||||||| ||| |||||| ||||||||||||||||||||||||||||||| ||||||

Sbjct 400 ATTGCGCCCCTTGGTATTCCGAGGGGCATGCCTGTTCGAGCGTCATTACACCAATCAAGC 459

Query 326 CTGGCTTGGTATTGAGCGACCGCGGC-CT--GC--CCGCGCGCTCCAATGTCTCCGGCTG 380

|||||||||||||| ||| ||| || || | |||||||| | |||||| ||||||

Sbjct 460 CTGGCTTGGTATTGGGCG-CCGTGGTTCTTTGGAGCCGCGCGCCCTAATGTCCTCGGCTG 518

Query 381 AGCCGTCCGTCTCTAAGCGTTGTGA-A-TAGCGATCGCTTGCGAGGCCCGGGCGGTT-CG 437

|||||||| ||| ||||||||||| | || ||||||||| | || || |||| ||

Sbjct 519 GGCCGTCCGCCTCGAAGCGTTGTGATAATACAGATCGCTTGTG-GGTGTGGACGGTCGCG 577

Query 438 ACGCCGTTAAAcccccccATTTTCTATGGTGACCGCGGATCAGGTAGG 485

|||||| |||||| ||||| | | ||||| |||||||||||||

Sbjct 578 -CGCCGTAAAACCC-----TTTTCAAGGTTGACCTCGGATCAGGTAGG 619

>Acrodontium luzulae CBS 839.71 ITS region; from TYPE material

Sequence ID: NR_154720.1 Length: 596

Range 1: 126 to 570

Score:462 bits(250), Expect:2e-130,

Identities:395/462(85%), Gaps:21/462(4%), Strand: Plus/Plus

Query 28 CCTCCAACCCCATGTCGAAACGACTCTGTTGCCTCGGGGGCG-ACCCGGCCTTCGGGCGT 86

|||||||||| ||||| |||||||||||||||||||||| |||||| ||| |||

Sbjct 126 CCTCCAACCCTTTGTCG-TCCGACTCTGTTGCCTCGGGGGCGTCCCCGGCGTTC--GCGC 182

Query 87 C-GGGGCCCCCGGCGGACACCTTCATAACTCTTGCATCTCTTGCGTCTGAGTGATACATA 145

| |||||||||||||| || || ||||| ||||||| |||||||||||| | ||||

Sbjct 183 CAGGGGCCCCCGGCGG--TCC-ACACAACTC-TGCATCT-TTGCGTCTGAGT-AAACATT 236

Query 146 TAATCAATCAAAACTTTCAACAACGGATCTCTTGGTTCTGGCATCGATGAAGAACGCAGC 205

||| || ||||||||||||||||||||||||||||||||||||||||||||||||||||

Sbjct 237 AAATGAAACAAAACTTTCAACAACGGATCTCTTGGTTCTGGCATCGATGAAGAACGCAGC 296

Query 206 GAAATGCGATAAGTAATGTGAATTGCAGAATTCAGTGAATCATCGAATCTTTGAACGCAC 265

||||||||||||||||||||||||||||||||||||||||||||||||||||||||||||

Sbjct 297 GAAATGCGATAAGTAATGTGAATTGCAGAATTCAGTGAATCATCGAATCTTTGAACGCAC 356

Query 266 ATTGCGCCCCCTGGCATTCCGGGGGGCATGCCTGTTCGAGCGTCATTACACCACTCAAGC 325

|||||||||| ||| |||||||||||||||||||||||||||||||||||||||||||||

Sbjct 357 ATTGCGCCCCTTGGTATTCCGGGGGGCATGCCTGTTCGAGCGTCATTACACCACTCAAGC 416

Query 326 CTGGCTTGGTATTGAGCGACCGCGGCCTGCCCGCGCGCTCCAATGTCTCCGGCTGAGCCG 385

|||||||||||||| ||| ||||| || | | |||||| | |||||| ||||| ||| ||

Sbjct 417 CTGGCTTGGTATTGGGCG-CCGCGCCC-GTC-GCGCGCCCTAATGTCGCCGGCCGAGTCG 473

Query 386 TCCGTCTCTAAGCGTTGTGAATAGCGATCGCT--TGCGAGGCCCGGGCGGTTCGACGCCG 443

|| ||||| |||||||||||| | ||||| || | | || | ||| || |||||

Sbjct 474 TCTGTCTCCGAGCGTTGTGAATCTCATTCGCTCCTG-GGGATCCAGACGGCGCG-CGCCG 531

Query 444 TTAAAcccccccATTTTCTATGGTGACCGCGGATCAGGTAGG 485

||||||| | ||| | | | ||||| |||||||||||||

Sbjct 532 TTAAACCTCT--TTTTAC-AGGTTGACCTCGGATCAGGTAGG 570

>Readeriella ellipsoidea ITS region; from TYPE material

Sequence ID: NR_155738.1 Length: 544

Range 1: 69 to 519

Score:462 bits(250), Expect:2e-130,

Identities:400/468(85%), Gaps:27/468(5%), Strand: Plus/Plus

Query 28 CCTCCAACCCCATGTCGAAACGACTCTGTTGCCTCGGGGGCGACCCGGCCT-TCGGGCGT 86

||||||||||||||| | ||||||||||||||||||||||||||||||| ||| ||

Sbjct 69 CCTCCAACCCCATGTTG-TCCGACTCTGTTGCCTCGGGGGCGACCCGGCCTCACGGCCG- 126

Query 87 CGGGGCCCCCGGCGGACACCTTCATAACTCTTGCATCTCTTGCGTCTGAGTGATACATAT 146

| |||||||||| |||| | || ||||| ||||||| | |||||||||| || |||

Sbjct 127 C-GGGCCCCCGGTGGACTAC-TC--AACTC-TGCATCT-TAGCGTCTGAGT-TTAATTAT 179

Query 147 -AATCAATCAAAACTTTCAACAACGGATCTCTTGGTTCTGGCATCGATGAAGAACGCAGC 205

||||||| |||||||||||||||||||||||||||||||||||||||||||||||||||

Sbjct 180 AAATCAATTAAAACTTTCAACAACGGATCTCTTGGTTCTGGCATCGATGAAGAACGCAGC 239

Query 206 GAAATGCGATAAGTAATGTGAATTGCAGAATTCAGTGAATCATCGAATCTTTGAACGCAC 265

||||||||||||||||||||||||||||||||||||||||||||||||||||||||||||

Sbjct 240 GAAATGCGATAAGTAATGTGAATTGCAGAATTCAGTGAATCATCGAATCTTTGAACGCAC 299

Query 266 ATTGCGCCCCCTGGCATTCCGGGGGGCATGCCTGTTCGAGCGTCATTACACCACTCAAGC 325

|||||||||| ||| |||||| ||||||||||||||||||||||||||||||| ||||||

Sbjct 300 ATTGCGCCCCTTGGTATTCCGAGGGGCATGCCTGTTCGAGCGTCATTACACCAATCAAGC 359

Query 326 CTGGCTTGGTATTGAGCGACCGCGGC-CTGC----CCGCGCGCTCCAATGTCTCCGGCTG 380

|||||||||||||| ||| ||| ||| || | |||||||| | |||||| ||||||

Sbjct 360 CTGGCTTGGTATTGGGCG-CCGTGGCTCTTCGGAGCCGCGCGCCCTAATGTCCTCGGCTG 418

Query 381 AGCCGTCCGTCTCTAAGCGTTGTGA-A-TAGCGATCGCTTGCGAGGCCCGGGCGGTT-CG 437

|||||||| ||| ||||||||||| | || ||||||||| | || || |||| ||

Sbjct 419 GGCCGTCCGCCTCGAAGCGTTGTGATAATACAGATCGCTTGTG-GGTGTGGACGGTCGCG 477

Query 438 ACGCCGTTAAAcccccccATTTTCTATGGTGACCGCGGATCAGGTAGG 485

|||||| ||||| | ||| | | | ||||| |||||||||||||

Sbjct 478 -CGCCGTAAAACCTC----TTT-CAAGGTTGACCTCGGATCAGGTAGG 519

>Myrtapenidiella tenuiramis CPC 13692 ITS region; from TYPE material

Sequence ID: NR_145118.1 Length: 481

Range 1: 9 to 481

Score:462 bits(250), Expect:2e-130,

Identities:411/486(85%), Gaps:22/486(4%), Strand: Plus/Plus

Query 5 CGAGTGTGGCGCTCCGGCGCCTCCCTCCAACCCCATGTCGAAACGA-CTCTGTTGCCTCG 63

|||||| || | ||||| || ||||||||||||||| ||| |||||||||||||

Sbjct 9 CGAGTGAGGGCCCCCGGC-CCGACCTCCAACCCCATGT-TTTCCGACCTCTGTTGCCTCG 66

Query 64 GGGGCGACCCGGCC-TTCGGGCGTCGGGGCCCCCGGCGGACACCTTCATAACTCTTGCAT 122

|||||||||||||| || ||| |||||||||| | |||| || | ||| | |||||

Sbjct 67 GGGGCGACCCGGCCGCTCCGGC--CGGGGCCCCCCGTGGACCCCAACCAAAC-CCTGCAT 123

Query 123 CTCTTGCGTCTGAGT-GATACATATAATCAATCAAAACTTTCAACAACGGATCTCTTGGT 181

|| ||||||||||| || ||| | |||||||||||||||||||||||||||||||||

Sbjct 124 ATC-TGCGTCTGAGTCAATTGATAAATTCAATCAAAACTTTCAACAACGGATCTCTTGGT 182

Query 182 TCTGGCATCGATGAAGAACGCAGCGAAATGCGATAAGTAATGTGAATTGCAGAATTCAGT 241

||||||||||||||||||||||||||||||||||||||||||||||||||||||||||||

Sbjct 183 TCTGGCATCGATGAAGAACGCAGCGAAATGCGATAAGTAATGTGAATTGCAGAATTCAGT 242

Query 242 GAATCATCGAATCTTTGAACGCACATTGCGCCCCCTGGCATTCCGGGGGGCATGCCTGTT 301

||||||||||||||||||||||||||||||||| |||||||||| |||||||||||||

Sbjct 243 GAATCATCGAATCTTTGAACGCACATTGCGCCCGGTGGCATTCCGCCGGGCATGCCTGTT 302

Query 302 CGAGCGTCATTACACCACTCAAGCCTGGCTTGGTATTGAGCGACCGCGGCCTGCCCGCGC 361

|||||||||||||||||||| ||||||||| ||||||| ||| ||||| | |||||||

Sbjct 303 CGAGCGTCATTACACCACTCCAGCCTGGCTGGGTATTGGGCGT-CGCGGTGTCCCCGCGC 361

Query 362 GC-TCCAATGTCTCCGGCTGAGCCGTCCGTCTC-TAAGCGTTGTGAAT-AGCGATC-GCT 417

|| || || ||||||||| |||||||||||||| |||||||||||| | | | | | |||

Sbjct 362 GCCTCGAA-GTCTCCGGCCGAGCCGTCCGTCTCATAAGCGTTGTGATTTATCAAGCCGCT 420

Query 418 TGCGAG-GCCCGGG-CGGTTCGACGCCGTTAAAcccccccATTTTCTATGGTGACCGCGG 475

|||||| || ||| | || || ||||||||||| || || | | | | ||||| |||

Sbjct 421 TGCGAGTGCGGGGGGCCGT-CG-CGCCGTTAAACGACC--ATCT-CAAGGTTGACCTCGG 475

Query 476 ATCAGG 481

||||||

Sbjct 476 ATCAGG 481

>Teratosphaeria mareebensis CBS 129529 ITS region; from TYPE material

Sequence ID: NR_156577.1 Length: 476

Range 1: 30 to 448

Score:462 bits(250), Expect:2e-130,

Identities:375/432(87%), Gaps:21/432(4%), Strand: Plus/Plus

Query 28 CCTCCAACCCCATGTCGAAACGACTCTGTTGCCTCGGGGGCGACCCGGCCTTCGGGCGTC 87

|||||||||||||||| | || |||||||||||||| ||||||||| || ||| |

Sbjct 30 CCTCCAACCCCATGTCTCCA-TACCATGTTGCCTCGGGGGTGACCCGGCCATC--GCGCC 86

Query 88 GGGGCCCCCGGCGGACACCTTCATAACTCTTGCATCTCTTGCGTCTGAGT--GATACATA 145

||||||||||| |||| || || ||||| ||||||| |||||||||||| | | | |

Sbjct 87 GGGGCCCCCGGTGGAC-CCCTC--AACTC-TGCATCT-TTGCGTCTGAGTAACAAAAAAA 141

Query 146 T-AATCAATCAAAACTTTCAACAACGGATCTCTTGGTTCTGGCATCGATGAAGAACGCAG 204

| ||||||||||||||||||||||||||||||||||||||||||||||||||||||||||

Sbjct 142 TCAATCAATCAAAACTTTCAACAACGGATCTCTTGGTTCTGGCATCGATGAAGAACGCAG 201

Query 205 CGAAATGCGATAAGTAATGTGAATTGCAGAATTCAGTGAATCATCGAATCTTTGAACGCA 264

||||||||||||||||||||||||||||||||||||||||||||||||||||||||||||

Sbjct 202 CGAAATGCGATAAGTAATGTGAATTGCAGAATTCAGTGAATCATCGAATCTTTGAACGCA 261

Query 265 CATTGCGCCCCCTGGCATTCCGGGGGGCATGCCTGTTCGAGCGTCATTACACCACTCAAG 324

|||||||||| |||| ||||||| ||||||||||||||||||||||||||||||||| ||

Sbjct 262 CATTGCGCCCTCTGGTATTCCGGAGGGCATGCCTGTTCGAGCGTCATTACACCACTCCAG 321

Query 325 CCTGGCTTGGTATTGAGCGACCGCGGCCTGCCCGCGCGCTCCAATGTCTCCGGCTGAGCC 384

||| ||| ||||||| ||| ||||||||| || |||||| ||||||||||||| |||||

Sbjct 322 CCTCGCTGGGTATTGGGCG-CCGCGGCCT-CC-GCGCGCCTCAATGTCTCCGGCCGAGCC 378

Query 385 GTCCGTCTCTAAGCGTTGTGA-ATAGC-GAT-CGCTTGCGAGGCCCGGGCGGTTCGACGC 441

| ||||||| |||||||||| | | | | | ||||| || || |||| | | ||||||

Sbjct 379 GACCGTCTCCAAGCGTTGTGGCACAACTGTTTCGCTTCCG-GGACCGGTCCGG-CGACGC 436

Query 442 -C-GTTAAAccc 451

| |||||||||

Sbjct 437 GCCGTTAAACCC 448

>Neocatenulostroma microsporum ITS region; from TYPE material

Sequence ID: NR_145114.1 Length: 481

Range 1: 10 to 405

Score:462 bits(250), Expect:2e-130,

Identities:359/408(88%), Gaps:21/408(5%), Strand: Plus/Plus

Query 6 GAGTGTGGCGCTCCGGCGCCTCCCTCCAACCCCATGTCGAAACGACTCTGTTGCCTCGGG 65

||||| || ||| ||| || ||||||||||||||| | ||| |||||||||| ||

Sbjct 10 GAGTGAGGGCCTCTGGC-CCGACCTCCAACCCCATGT-TATCTGACACTGTTGCCTCCGG 67

Query 66 GGCGACCCGGCCT----TCGGGCG--TCGGGGCCCCCGGCGGACACCTTCATAACTCTTG 119

||||||||||||| ||||||| |||||||||| || |||| | ||| ||||| ||

Sbjct 68 GGCGACCCGGCCTGCCTTCGGGCGTTTCGGGGCCCCGGGTGGAC-CATTC--AACTC-TG 123

Query 120 CATCTCTTGCGTCTGAGTGATACAT-A-T-AATCAATCAAAACTTTCAACAACGGATCTC 176

||||| |||||||||||| | | || | | ||||||||||||||||||||||||||||||

Sbjct 124 CATCT-TTGCGTCTGAGT-A-A-ATGATTGAATCAATCAAAACTTTCAACAACGGATCTC 179

Query 177 TTGGTTCTGGCATCGATGAAGAACGCAGCGAAATGCGATAAGTAATGTGAATTGCAGAAT 236

||||||||||||||||||||||||||||||||||||||||||||||||||||||||||||

Sbjct 180 TTGGTTCTGGCATCGATGAAGAACGCAGCGAAATGCGATAAGTAATGTGAATTGCAGAAT 239

Query 237 TCAGTGAATCATCGAATCTTTGAACGCACATTGCGCCCCCTGGCATTCCGGGGGGCATGC 296

||||||||||||||||||||||||||||||||||||||| ||| |||||| |||||||||

Sbjct 240 TCAGTGAATCATCGAATCTTTGAACGCACATTGCGCCCCTTGGTATTCCGAGGGGCATGC 299

Query 297 CTGTTCGAGCGTCATTACACCACTCAAGCCTGGCTTGGTATTGAGCGACCGCGGCCTGCC 356

||||||||||||||||||||||||||||||| ||||||||||| ||| |||||| | |||

Sbjct 300 CTGTTCGAGCGTCATTACACCACTCAAGCCTCGCTTGGTATTGGGCG-CCGCGGTCCGCC 358

Query 357 CGCGCGCTCCAATGTCTCCGGCTGAGCCGTCCGTCTCTAAGCGTTGTG 404

|||||| |||||| ||||||||||| || ||||||||||||||||

Sbjct 359 -GCGCGCCTCAATGTTTCCGGCTGAGCTCTCTGTCTCTAAGCGTTGTG 405

>Sphaerulina hypericii CBS 102313 ITS region; from TYPE material

Sequence ID: NR_147271.1 Length: 493

Range 1: 17 to 450

Score:462 bits(250), Expect:2e-130,

Identities:386/449(86%), Gaps:20/449(4%), Strand: Plus/Plus

Query 5 CGAGTGTGGCGCTCCGGCGCCTCCCTCCAACCCCATGTCGAA-ACGACTCTGTTGCCTCG 63

|||||| || |||||||| || ||||||||||| ||| ||| || ||| |||||| |||

Sbjct 17 CGAGTGCGG-GCTCCGGC-CCGCCCTCCAACCCTTTGT-GAACACAACT-TGTTGCTTCG 72

Query 64 GGGGCGACCCGGCC-TTCGGGCGTCG-GGGCCCCCGGCGGACACCTTCATAACTCTTGCA 121

|||||||||| ||| ||| | || || | |||||||| || |||||| ||| | ||||

Sbjct 73 GGGGCGACCCTGCCGTTCCGACGGCGAGCGCCCCCGGAGG---CCTTCA-AACAC-TGCA 127

Query 122 TCTCTTGCGTCTGAGTGATACATATAATCAATCAAAACTTTCAACAACGGATCTCTTGGT 181

||| ||||||| |||| || || | | || ||||||||||||||||||||||||||||

Sbjct 128 TCT-TTGCGTCGGAGT-TTAAGTAAATTTAAACAAAACTTTCAACAACGGATCTCTTGGT 185

Query 182 TCTGGCATCGATGAAGAACGCAGCGAAATGCGATAAGTAATGTGAATTGCAGAATTCAGT 241

||||||||||||||||||||||||||||||||||||||||||||||||||||||||||||

Sbjct 186 TCTGGCATCGATGAAGAACGCAGCGAAATGCGATAAGTAATGTGAATTGCAGAATTCAGT 245

Query 242 GAATCATCGAATCTTTGAACGCACATTGCGCCCCCTGGCATTCCGGGGGGCATGCCTGTT 301

||||||||||||||||||||||||||||||||| |||| ||||||| |||||||||||||

Sbjct 246 GAATCATCGAATCTTTGAACGCACATTGCGCCCTCTGGTATTCCGGAGGGCATGCCTGTT 305

Query 302 CGAGCGTCATTACACCACTCAAGCCTGGCTTGGTATTGAGCGACCGCGGCCTGCCCGCGC 361

||||||||||| |||||||||||||||||||||||||| ||| |||||| | || ||||

Sbjct 306 CGAGCGTCATTTCACCACTCAAGCCTGGCTTGGTATTGGGCG-CCGCGGTGTTCC-GCGC 363

Query 362 GCTCCAATGTCTCCGGCTGAGCCGTCCGTCTCTAAGCGTTGTGAAT--AGCGATCGCTTG 419

|| ||| |||||||||||||| ||||||||| ||||||||||| | | |||||||

Sbjct 364 GCCTCAAAGTCTCCGGCTGAGCTGTCCGTCTCCAAGCGTTGTGATTTCATTAATCGCTT- 422

Query 420 CGAGGCCCGGGCGGTTCGACGCCGTTAAA 448

|| ||| ||||||| || |||||||||

Sbjct 423 CGGGGCGCGGGCGGC-CGCGGCCGTTAAA 450

>Neocatenulostroma abietis CBS 459.93 ITS region; from TYPE material

Sequence ID: NR_145103.1 Length: 512

Range 1: 33 to 428

Score:462 bits(250), Expect:2e-130,

Identities:359/408(88%), Gaps:21/408(5%), Strand: Plus/Plus

Query 6 GAGTGTGGCGCTCCGGCGCCTCCCTCCAACCCCATGTCGAAACGACTCTGTTGCCTCGGG 65

||||| || ||| ||| || ||||||||||||||| | ||| |||||||||| ||

Sbjct 33 GAGTGAGGGCCTCTGGC-CCGACCTCCAACCCCATGT-TATCTGACACTGTTGCCTCCGG 90

Query 66 GGCGACCCGGCCT----TCGGGCG--TCGGGGCCCCCGGCGGACACCTTCATAACTCTTG 119

||||||||||||| ||||||| |||||||||| || |||| | ||| ||||| ||

Sbjct 91 GGCGACCCGGCCTGCCTTCGGGCGATTCGGGGCCCCGGGTGGAC-CATTC--AACTC-TG 146

Query 120 CATCTCTTGCGTCTGAGTGATACAT-A-T-AATCAATCAAAACTTTCAACAACGGATCTC 176

||||| |||||||||||| | | || | | ||||||||||||||||||||||||||||||

Sbjct 147 CATCT-TTGCGTCTGAGT-A-A-ATGATTGAATCAATCAAAACTTTCAACAACGGATCTC 202

Query 177 TTGGTTCTGGCATCGATGAAGAACGCAGCGAAATGCGATAAGTAATGTGAATTGCAGAAT 236

||||||||||||||||||||||||||||||||||||||||||||||||||||||||||||

Sbjct 203 TTGGTTCTGGCATCGATGAAGAACGCAGCGAAATGCGATAAGTAATGTGAATTGCAGAAT 262

Query 237 TCAGTGAATCATCGAATCTTTGAACGCACATTGCGCCCCCTGGCATTCCGGGGGGCATGC 296

||||||||||||||||||||||||||||||||||||||| ||| |||||| |||||||||

Sbjct 263 TCAGTGAATCATCGAATCTTTGAACGCACATTGCGCCCCTTGGTATTCCGAGGGGCATGC 322

Query 297 CTGTTCGAGCGTCATTACACCACTCAAGCCTGGCTTGGTATTGAGCGACCGCGGCCTGCC 356

||||||||||||||||||||||||||||||| ||||||||||| ||| |||||| | |||

Sbjct 323 CTGTTCGAGCGTCATTACACCACTCAAGCCTCGCTTGGTATTGGGCG-CCGCGGTCCGCC 381

Query 357 CGCGCGCTCCAATGTCTCCGGCTGAGCCGTCCGTCTCTAAGCGTTGTG 404

|||||| |||||| ||||||||||| || ||||||||||||||||

Sbjct 382 -GCGCGCCTCAATGTTTCCGGCTGAGCTCTCTGTCTCTAAGCGTTGTG 428

>Suberoteratosphaeria suberosa CBS 436.92 ITS region; from TYPE material

Sequence ID: NR_147258.1 Length: 551

Range 1: 60 to 529

Score:462 bits(250), Expect:2e-130,

Identities:415/490(85%), Gaps:29/490(5%), Strand: Plus/Plus

Query 5 CGAGTGTGGCG-CTCC-GGCGCCTCCCTCCAACCCCATGTCGAAACGACTCTGTTGCCTC 62

|||||| ||| |||| |||| | ||||||||||||||| | | || |||||||||

Sbjct 60 CGAGTG-AGCGCCTCCGGGCG-CGACCTCCAACCCCATGT-TATCCAACCATGTTGCCTC 116

Query 63 GGGGGCGACCCGGCC-TTCGGGCG-TCGGGGCCCCCGGCGGACACCTTCATAACTCTTGC 120

||||||||||||||| | ||| || || |||||||| |||| || || ||||| |||

Sbjct 117 GGGGGCGACCCGGCCGTCCGGCCGATC---GCCCCCGGTGGAC-CCCTC--AACTC-TGC 169

Query 121 ATCTCTTGCGTCTGAGTGATACAT-AT-AATCAATCAAAACTTTCAACAACGGATCTCTT 178

|||| ||||||| |||| || || || ||||||||||||||||||||||||||||||||

Sbjct 170 ATCT-TTGCGTCGGAGT-CTA-ATGATAAATCAATCAAAACTTTCAACAACGGATCTCTT 226

Query 179 GGTTCTGGCATCGATGAAGAACGCAGCGAAATGCGATAAGTAATGTGAATTGCAGAATTC 238

||||||||||||||||||||||||||||||||||||||||||||||||||||||||||||

Sbjct 227 GGTTCTGGCATCGATGAAGAACGCAGCGAAATGCGATAAGTAATGTGAATTGCAGAATTC 286

Query 239 AGTGAATCATCGAATCTTTGAACGCACATTGCGCCCCCTGGCATTCCGGGGGGCATGCCT 298

||||||||||||||||||||||||||||||||||||| ||| |||||| |||||||||||

Sbjct 287 AGTGAATCATCGAATCTTTGAACGCACATTGCGCCCCTTGGTATTCCGAGGGGCATGCCT 346

Query 299 GTTCGAGCGTCATTACACCACTCAAGCCTGGCTTGGTATTGAGCGACCGCGGCCTGCCCG 358

|||||||||||||| |||||||||||||| ||||||||||| ||| |||||| | | |||

Sbjct 347 GTTCGAGCGTCATTTCACCACTCAAGCCTCGCTTGGTATTGGGCG-CCGCGGTCCG-CCG 404

Query 359 CGCGCTCCAATGTCTCCGGCTGAGCCGTCCGTC-TCTAAGCGTTGTGAATAGCGATC--G 415

||||| ||||||||||||||| |||| |||| || ||||| | ||| || | ||| |

Sbjct 405 CGCGCCCCAATGTCTCCGGCTCAGCCCAACGTCCTCGAAGCGATTTGATTA-CAATCCCG 463

Query 416 CTTGCGAGGCCCGGGCGGTTCGACGCCGTTAAAcccccccATTTTCTATGGTGACCGCGG 475

|| || |||| ||| || |||||||| ||||| |||| || | | | ||||| |||

Sbjct 464 CTAGC-AGGCACGGAGGGCGCGACGCCGCTAAACACCCC-ATCA-C-AGGTTGACCTCGG 519

Query 476 ATCAGGTAGG 485

||||||||||

Sbjct 520 ATCAGGTAGG 529

>Nothodevriesia narthecii CBS 149066 ITS region; from TYPE material

Sequence ID: NR_182505.1 Length: 492

Range 1: 63 to 481

Score:460 bits(249), Expect:8e-130,

Identities:376/435(86%), Gaps:18/435(4%), Strand: Plus/Plus

Query 53 CTGTTGCCTCGGGGGCGACCCGGCCTTCGGGCGTCGGGGCCCCCGGCGGACACCTTCATA 112

||||||||||||||||||||||||||| |||||||||||||||||||||| | || |

Sbjct 63 CTGTTGCCTCGGGGGCGACCCGGCCTTTCGGCGTCGGGGCCCCCGGCGGACCAC-TC--A 119

Query 113 ACTCTTGCATCTCTTGCGTCTGAGTGATACATATAATCAATCAAAACTTTCAACAACGGA 172

|| | ||||||| ||||| |||| | | || ||||||||||||||||||||||||||

Sbjct 120 AC-CCTGCATCT-AGGCGTCCGAGT-ACAGATTGAATCAATCAAAACTTTCAACAACGGA 176

Query 173 TCTCTTGGTTCTGGCATCGATGAAGAACGCAGCGAAATGCGATAAGTAATGTGAATTGCA 232

||||||||||||||||||||||||||||||||||||||||||||||||||||||||||||

Sbjct 177 TCTCTTGGTTCTGGCATCGATGAAGAACGCAGCGAAATGCGATAAGTAATGTGAATTGCA 236

Query 233 GAATTCAGTGAATCATCGAATCTTTGAACGCACATTGCGCCCCCTGGCATTCCGGGGGGC 292

||||||||||||||||||||||||||||||||||||||||||||||| ||||||||||||

Sbjct 237 GAATTCAGTGAATCATCGAATCTTTGAACGCACATTGCGCCCCCTGGTATTCCGGGGGGC 296

Query 293 ATGCCTGTTCGAGCGTCATTACACCACTCAAGCCTGGCTTGGTATTGAGCGACCGCGGCC 352

|||||||||||||||||||| |||||||||||||| ||||||| ||| ||| |||| ||

Sbjct 297 ATGCCTGTTCGAGCGTCATTTCACCACTCAAGCCTCGCTTGGTGTTGGGCG-CCGCATCC 355

Query 353 TGCCCGCGCGCTCCAATGTCTCCGGCTGAGCCGT-CCGTCTCTAAGCGTTGTGAATAGC- 410

| |||||| ||||||| ||||| ||| || |||||||||||||||||| | |

Sbjct 356 A-CT-GCGCGCCCCAATGTACCCGGCCGAGTTGTCCCGTCTCTAAGCGTTGTGGTCATCA 413

Query 411 GATCGCTTGCGAGGCCCGGGCGGTTCGACGCCGTTAAAcccccccATTTTCTATGGTGAC 470

| ||||||||||| ||||||| || |||||| |||||| ||||| | | ||||

Sbjct 414 GTTCGCTTGCGAGATTGGGGCGGT-CG-CGCCGTAAAACCC-----TTTTCAAGGTTGAC 466

Query 471 CGCGGATCAGGTAGG 485

| |||||||||||||

Sbjct 467 CTCGGATCAGGTAGG 481

>Teratosphaeria carnegiei CMW 52484 ITS region; from TYPE material

Sequence ID: NR_182378.1 Length: 515

Range 1: 68 to 407

Score:460 bits(249), Expect:8e-130,

Identities:319/351(91%), Gaps:12/351(3%), Strand: Plus/Plus

Query 55 GTTGCCTCGGGGGCGACCCGGCCTTCGGGCGTCGGGGCCCCCGGCGGACACCTTCATAAC 114

||||||||||||||||||||||| | ||| ||| ||||||||||| | || || |||

Sbjct 68 GTTGCCTCGGGGGCGACCCGGCC-GC-CGCGCCGGCGCCCCCGGCGG-CCCCCTC--AAC 122

Query 115 TCTTGCATCTCTTGCGTCTGAGTGAT-ACATATAATCAATCAAAACTTTCAACAACGGAT 173

|| ||||||| ||||||||||||||| | | |||||||||||||||||||||||||||

Sbjct 123 TC-TGCATCT-TTGCGTCTGAGTGATGTGACA-AATCAATCAAAACTTTCAACAACGGAT 179

Query 174 CTCTTGGTTCTGGCATCGATGAAGAACGCAGCGAAATGCGATAAGTAATGTGAATTGCAG 233

||||||||||||||||||||||||||||||||||||||||||||||||||||||||||||

Sbjct 180 CTCTTGGTTCTGGCATCGATGAAGAACGCAGCGAAATGCGATAAGTAATGTGAATTGCAG 239

Query 234 AATTCAGTGAATCATCGAATCTTTGAACGCACATTGCGCCCCCTGGCATTCCGGGGGGCA 293

|||||||||||||||||||||||||||||||||||||||||||||| |||||||||||||

Sbjct 240 AATTCAGTGAATCATCGAATCTTTGAACGCACATTGCGCCCCCTGGTATTCCGGGGGGCA 299

Query 294 TGCCTGTTCGAGCGTCATTACACCACTCAAGCCTGGCTTGGTATTGAGCGACCGCGGCCT 353

|||||||||||||||||||||||||||| ||||| ||| ||| ||| ||| ||||||||

Sbjct 300 TGCCTGTTCGAGCGTCATTACACCACTCCAGCCTCGCTGGGTCTTGGGCG-CCGCGGCC- 357

Query 354 GCCCGCGCGCTCCAATGTCTCCGGCTGAGCCGTCCGTCTCTAAGCGTTGTG 404

||||||||| | |||||||||||| |||||| |||||||| |||||||||

Sbjct 358 -CCCGCGCGCCCTAATGTCTCCGGCCGAGCCGACCGTCTCTCAGCGTTGTG 407

>Parateratosphaeria karinae CBS 128774 ITS region; from TYPE material

Sequence ID: NR_155625.1 Length: 580

Range 1: 56 to 448

Score:460 bits(249), Expect:8e-130,

Identities:352/401(88%), Gaps:9/401(2%), Strand: Plus/Plus

Query 5 CGAGTGTGGCGCTCCGGCGCCTCCCTCCAACCCCAT-GTCGAAACGACTCTGTTGCCTCG 63

|||||| || |||||| || ||||||||||||| || |||| | |||||||||

Sbjct 56 CGAGTGAGGGCCTCCGGGCCCGACCTCCAACCCCATTGT-TTTCCGACCCAGTTGCCTCG 114

Query 64 GGGGCGACCCGGCCTTCGGGCGTCGGGGCCCCCGGCGGACACCTTCATAACTCTTGCATC 123

|||| |||||||||||||||| | |||||||||| |||| || | ||| || |||||

Sbjct 115 GGGGTGACCCGGCCTTCGGGC--CAGGGCCCCCGGTGGACCCCAACCGAACACT-GCATC 171

Query 124 TCTTGCGTCTGAGTGATACATATAATCAATCAAAACTTTCAACAACGGATCTCTTGGTTC 183

|| |||||||||||||| | ||||||| ||||||||||||||||||||||||||| |

Sbjct 172 TC-TGCGTCTGAGTGAT-TAGCGAATCAATTAAAACTTTCAACAACGGATCTCTTGGTAC 229

Query 184 TGGCATCGATGAAGAACGCAGCGAAATGCGATAAGTAATGTGAATTGCAGAATTCAGTGA 243

||||||||||||||||||||||||||||||||||||||||||||||||||||||||||||

Sbjct 230 TGGCATCGATGAAGAACGCAGCGAAATGCGATAAGTAATGTGAATTGCAGAATTCAGTGA 289

Query 244 ATCATCGAATCTTTGAACGCACATTGCGCCCCCTGGCATTCCGGGGGGCATGCCTGTTCG 303

||||||||||||||||||||||||||||||||||||||||||||||||||||||||||||

Sbjct 290 ATCATCGAATCTTTGAACGCACATTGCGCCCCCTGGCATTCCGGGGGGCATGCCTGTTCG 349

Query 304 AGCGTCATTACACCACTCAAGCCTGGCTTGGTATTGAGCGACCGCGGCCTGCCCGCGCGC 363

|||||||||||||||||||||||||||||||||||| ||| | |||| | ||||||||

Sbjct 350 AGCGTCATTACACCACTCAAGCCTGGCTTGGTATTGGGCGTC-GCGGGA-GACCGCGCGC 407

Query 364 TCCAATGTCTCCGGCTGAGCCGTCCGTCTCTAAGCGTTGTG 404

||| ||| ||||||| ||||||||||| ||||||||||

Sbjct 408 CTCAAAGTCACCGGCTGGACCGTCCGTCTCCAAGCGTTGTG 448

>Penidiella aggregata CBS 128772 ITS region; from TYPE material

Sequence ID: NR_137772.1 Length: 645

Range 1: 148 to 540

Score:460 bits(249), Expect:8e-130,

Identities:354/403(88%), Gaps:13/403(3%), Strand: Plus/Plus

Query 5 CGAGTGTGGCGCTCCGGCGCCTCCCTCCAACCCCATGTCGAAACGACTCTGTTGCCTCGG 64

|||||| || |||||| || ||||||||||||||| | ||| ||||||||||||

Sbjct 148 CGAGTGAGGGCCTCCGGGTCCGACCTCCAACCCCATGT-TATCTGACCCTGTTGCCTCGG 206

Query 65 GGGCGACCCGGCC--TTCGGGCGTCGGGGCCCCCGGCGGACACCTTCATAACTCTTGCAT 122

||||||||||||| || ||| |||||||||||||| |||| | || ||| | |||||

Sbjct 207 GGGCGACCCGGCCCTTTTGGGTGTCGGGGCCCCCGGTGGAC--C-ACA-AACAC-TGCAT 261

Query 123 CTCTTGCGTCTGAGTGAT-ACATATAATCAATCAAAACTTTCAACAACGGATCTCTTGGT 181

|| ||||||| |||| || ||| |||||||||||||||||||||||||||||||||||

Sbjct 262 CT-TTGCGTCGGAGTAATTGAATA-AATCAATCAAAACTTTCAACAACGGATCTCTTGGT 319

Query 182 TCTGGCATCGATGAAGAACGCAGCGAAATGCGATAAGTAATGTGAATTGCAGAATTCAGT 241

||||||||||||||||||||||||||||||||||||||||||||||||||||||||||||

Sbjct 320 TCTGGCATCGATGAAGAACGCAGCGAAATGCGATAAGTAATGTGAATTGCAGAATTCAGT 379

Query 242 GAATCATCGAATCTTTGAACGCACATTGCGCCCCCTGGCATTCCGGGGGGCATGCCTGTT 301

|||||||||||||||||||||||||||||||||| || |||||||||||||||||||||

Sbjct 380 GAATCATCGAATCTTTGAACGCACATTGCGCCCCTCGGTATTCCGGGGGGCATGCCTGTT 439

Query 302 CGAGCGTCATTACACCACTCAAGCCTGGCTTGGTATTGAGCGACCGCGGCCTGCCCGCGC 361

|||||||||||||||||||||||||||||||||||||| ||| |||||| | ||| ||||

Sbjct 440 CGAGCGTCATTACACCACTCAAGCCTGGCTTGGTATTGGGCG-CCGCGGTCCGCC-GCGC 497

Query 362 GCTCCAATGTCTCCGGCTGAGCCGTCCGTCTCTAAGCGTTGTG 404

|| | ||||||| ||||||||| || ||| | |||||||||

Sbjct 498 GCCCTAATGTCTTCGGCTGAGCTCTCTGTCCCCCAGCGTTGTG 540

>Readeriella menaiensis ITS region; from TYPE material

Sequence ID: NR_156533.1 Length: 591

Range 1: 113 to 565

Score:459 bits(248), Expect:3e-129,

Identities:401/470(85%), Gaps:29/470(6%), Strand: Plus/Plus

Query 28 CCTCCAACCCCATGTCGAAACGACTCTGTTGCCTCGGGGGCGACCCGGCCT-TCGGGCGT 86

||||||||||||||| | ||||||||||||||||||||||||||||||| ||| ||

Sbjct 113 CCTCCAACCCCATGTTG-TCCGACTCTGTTGCCTCGGGGGCGACCCGGCCTCACGGCCG- 170

Query 87 CGGGGCCCCCGGCGGACACCTTCATAACTCTTGCATCTCTTGCGTCTGAGTGATACATAT 146

| |||||||||| |||| | || ||||| ||||||| | |||||||||| || |||

Sbjct 171 C-GGGCCCCCGGTGGACTAC-TC--AACTC-TGCATCT-TAGCGTCTGAGT-TTAATTAT 223

Query 147 -AATCAATCAAAACTTTCAACAACGGATCTCTTGGTTCTGGCATCGATGAAGAACGCAGC 205

||||||| |||||||||||||||||||||||||||||||||||||||||||||||||||

Sbjct 224 AAATCAATTAAAACTTTCAACAACGGATCTCTTGGTTCTGGCATCGATGAAGAACGCAGC 283

Query 206 GAAATGCGATAAGTAATGTGAATTGCAGAATTCAGTGAATCATCGAATCTTTGAACGCAC 265

||||||||||||||||||||||||||||||||||||||||||||||||||||||||||||

Sbjct 284 GAAATGCGATAAGTAATGTGAATTGCAGAATTCAGTGAATCATCGAATCTTTGAACGCAC 343

Query 266 ATTGCGCCCCCTGGCATTCCGGGGGGCATGCCTGTTCGAGCGTCATTACACCACTCAAGC 325

|||||||||| ||| |||||| ||||||||||||||||||||||||||||||| ||||||

Sbjct 344 ATTGCGCCCCTTGGTATTCCGAGGGGCATGCCTGTTCGAGCGTCATTACACCAATCAAGC 403

Query 326 CTGGCTTGGTATTGAGCGACCGCGGC-CTGC----CCGCGCGCTCCAATGTCTCCGGCTG 380

|||||||||||||| ||| |||||| || | |||||||| | |||||| ||||||

Sbjct 404 CTGGCTTGGTATTGGGCG-CCGCGGTTCTCCGGAGCCGCGCGCCCTAATGTCCTCGGCTG 462

Query 381 AGCCGTCCGTCTCTAAGCGTTGTGA-A-TAGCGATCGCTTGCGAGGCCCGGGCGGTT-CG 437

|||||||| ||| ||||||||||| | || ||||||||| | || || |||| ||

Sbjct 463 GGCCGTCCGCCTCGAAGCGTTGTGATAATACAGATCGCTTGTG-GGTGTGGACGGTCGCG 521

Query 438 ACGCCGTTAAAcccccccATTTTCT-ATGG-TGACCGCGGATCAGGTAGG 485

|||||| ||||| ||| || | || ||||| |||||||||||||

Sbjct 522 -CGCCGTAAAACC-----TTTTACTCAAGGTTGACCTCGGATCAGGTAGG 565

>Readeriella eucalyptigena ITS region; from TYPE material

Sequence ID: NR_156532.1 Length: 625

Range 1: 144 to 596

Score:459 bits(248), Expect:3e-129,

Identities:401/470(85%), Gaps:29/470(6%), Strand: Plus/Plus

Query 28 CCTCCAACCCCATGTCGAAACGACTCTGTTGCCTCGGGGGCGACCCGGCCT-TCGGGCGT 86

||||||||||||||| | ||||||||||||||||||||||||||||||| ||| ||

Sbjct 144 CCTCCAACCCCATGTTG-TCCGACTCTGTTGCCTCGGGGGCGACCCGGCCTCACGGCCG- 201

Query 87 CGGGGCCCCCGGCGGACACCTTCATAACTCTTGCATCTCTTGCGTCTGAGTGATACATAT 146

| |||||||||| |||| | || ||||| ||||||| | |||||||||| || |||

Sbjct 202 C-GGGCCCCCGGTGGACTAC-TC--AACTC-TGCATCT-TAGCGTCTGAGT-TTAATTAT 254

Query 147 -AATCAATCAAAACTTTCAACAACGGATCTCTTGGTTCTGGCATCGATGAAGAACGCAGC 205

||||||| |||||||||||||||||||||||||||||||||||||||||||||||||||

Sbjct 255 AAATCAATTAAAACTTTCAACAACGGATCTCTTGGTTCTGGCATCGATGAAGAACGCAGC 314

Query 206 GAAATGCGATAAGTAATGTGAATTGCAGAATTCAGTGAATCATCGAATCTTTGAACGCAC 265

||||||||||||||||||||||||||||||||||||||||||||||||||||||||||||

Sbjct 315 GAAATGCGATAAGTAATGTGAATTGCAGAATTCAGTGAATCATCGAATCTTTGAACGCAC 374

Query 266 ATTGCGCCCCCTGGCATTCCGGGGGGCATGCCTGTTCGAGCGTCATTACACCACTCAAGC 325

|||||||||| ||| |||||| ||||||||||||||||||||||||||||||| ||||||

Sbjct 375 ATTGCGCCCCTTGGTATTCCGAGGGGCATGCCTGTTCGAGCGTCATTACACCAATCAAGC 434

Query 326 CTGGCTTGGTATTGAGCGACCGCGGC-CTGC----CCGCGCGCTCCAATGTCTCCGGCTG 380

|||||||||||||| ||| ||| ||| || | |||||||| | |||||| ||||||

Sbjct 435 CTGGCTTGGTATTGGGCG-CCGTGGCTCTCCGGAGCCGCGCGCCCTAATGTCCTCGGCTG 493

Query 381 AGCCGTCCGTCTCTAAGCGTTGTGA-A-TAGCGATCGCTTGCGAGGCCCGGGCGGTT-CG 437

|||||||| ||| ||||||||||| | || ||||||||| | || || |||| ||

Sbjct 494 GGCCGTCCGCCTCGAAGCGTTGTGATAATACAGATCGCTTGTG-GGTGTGGACGGTCGCG 552

Query 438 ACGCCGTTAAAcccccccATTTTCT-ATGG-TGACCGCGGATCAGGTAGG 485

|||||| ||||| ||| || | || ||||| |||||||||||||

Sbjct 553 -CGCCGTAAAACC-----TTTTACTCAAGGTTGACCTCGGATCAGGTAGG 596

>Readeriella angustia ITS region; from TYPE material

Sequence ID: NR_156531.1 Length: 637

Range 1: 167 to 587

Score:459 bits(248), Expect:3e-129,

Identities:375/433(87%), Gaps:22/433(5%), Strand: Plus/Plus

Query 28 CCTCCAACCCCATGTCGAAACGACTCTGTTGCCTCGGGGGCGACCCGGCC-TTCGGGCGT 86

||||||||||||||| | |||||||||||||||||||||||||||||| | ||| ||

Sbjct 167 CCTCCAACCCCATGTTG-TCCGACTCTGTTGCCTCGGGGGCGACCCGGCCCTACGGCCG- 224

Query 87 CGGGGCCCCCGGCGGACACCTTCATAACTCTTGCATCTCTTGCGTCTGAGTGATACATAT 146

| |||||||||| |||| | || ||||| ||||||| | |||||||||| || |||

Sbjct 225 C-GGGCCCCCGGTGGACTAC-TC--AACTC-TGCATCT-TAGCGTCTGAGT-TTAATTAT 277

Query 147 -AATCAATCAAAACTTTCAACAACGGATCTCTTGGTTCTGGCATCGATGAAGAACGCAGC 205

||||||| |||||||||||||||||||||||||||||||||||||||||||||||||||

Sbjct 278 AAATCAATTAAAACTTTCAACAACGGATCTCTTGGTTCTGGCATCGATGAAGAACGCAGC 337

Query 206 GAAATGCGATAAGTAATGTGAATTGCAGAATTCAGTGAATCATCGAATCTTTGAACGCAC 265

||||||||||||||||||||||||||||||||||||||||||||||||||||||||||||

Sbjct 338 GAAATGCGATAAGTAATGTGAATTGCAGAATTCAGTGAATCATCGAATCTTTGAACGCAC 397

Query 266 ATTGCGCCCCCTGGCATTCCGGGGGGCATGCCTGTTCGAGCGTCATTACACCACTCAAGC 325

|||||||||| ||| |||||| ||||||||||||||||||||||||||||||| ||||||

Sbjct 398 ATTGCGCCCCTTGGTATTCCGAGGGGCATGCCTGTTCGAGCGTCATTACACCAATCAAGC 457

Query 326 CTGGCTTGGTATTGAGCGACCGCGGC-CTGC----CCGCGCGCTCCAATGTCTCCGGCTG 380

|||||||||||||| ||| ||||||| || | |||||||| | |||||| ||||||

Sbjct 458 CTGGCTTGGTATTGGGCG-CCGCGGCTCTCCGGAGCCGCGCGCCCTAATGTCCTCGGCTG 516

Query 381 AGCCGTCCGTCTCTAAGCGTTGTGA-ATAGC-GATCGCTTGCGAGGCCCGGGCGGTT-CG 437

|||||||| ||| ||||||||||| | | ||||||||| | || || |||| ||

Sbjct 517 GGCCGTCCGCCTCGAAGCGTTGTGATCAAACAGATCGCTTGTG-GGTGTGGACGGTCGCG 575

Query 438 ACGCCGTTAAAcc 450

|||||| |||||

Sbjct 576 -CGCCGTAAAACC 587

>Neobryochiton narthecii CBS 149172 ITS region; from TYPE material

Sequence ID: NR_184368.1 Length: 478

Range 1: 7 to 461

Score:459 bits(248), Expect:3e-129,

Identities:396/464(85%), Gaps:23/464(4%), Strand: Plus/Plus

Query 5 CGAGTGTGGCGCTCCGGCGCCTCCCTCCAACCCCATGTCGAAACGACTCTGTTGCCTCGG 64

|||||| || ||||||| ||| |||||||||| ||||| | |||| ||||||||||||

Sbjct 7 CGAGTGAGG-GCTCCGG-GCCGACCTCCAACCCTATGTC-TACCGACCCTGTTGCCTCGG 63

Query 65 GGGCGACCCGGC---C--T--TCGGGCG--TCGGGGCCCCCGGCGGACACCTTCATAACT 115

||| |||||||| | | ||||||| ||||||||||||||||| || | |||

Sbjct 64 GGGTGACCCGGCGCCCGTTCCTCGGGCGCCCCGGGGCCCCCGGCGGAC-CC--CCCAACG 120

Query 116 CTTGCATCTCTTGCGTCTGAGTGATACATATAATCAATCAAAACTTTCAACAACGGATCT 175

| ||||||| |||||| |||| ||| | |||||||||||||||||||||||||||||

Sbjct 121 C-TGCATCT-GTGCGTCCGAGTCATA-TTTGAATCAATCAAAACTTTCAACAACGGATCT 177

Query 176 CTTGGTTCTGGCATCGATGAAGAACGCAGCGAAATGCGATAAGTAATGTGAATTGCAGAA 235

||||||||||||||||||||||||||||||||||||||||||||||||||||||||||||

Sbjct 178 CTTGGTTCTGGCATCGATGAAGAACGCAGCGAAATGCGATAAGTAATGTGAATTGCAGAA 237

Query 236 TTCAGTGAATCATCGAATCTTTGAACGCACATTGCGCCCCCTGGCATTCCGGGGGGCATG 295

|||||||||||||||||||||||||||||||||||||||| ||| |||||| ||||||||

Sbjct 238 TTCAGTGAATCATCGAATCTTTGAACGCACATTGCGCCCCGTGGTATTCCGCGGGGCATG 297

Query 296 CCTGTTCGAGCGTCATTACACCACTCAAGCCTGGCTTGGTATTGAGCGACCGCGGC--CT 353

||||||||||||||||| ||||| |||||||| ||||||||||| ||| ||||||| |

Sbjct 298 CCTGTTCGAGCGTCATTTCACCAATCAAGCCTCGCTTGGTATTGGGCGTCCGCGGCGGCA 357

Query 354 GC-CCGCGCGCTCCAATGTCTCCGGCTGAGCCGTCCGTCTCTAAGCGTTGTGAA-TAGC- 410

| |||||||| ||||||||||||||||||||| | |||||||||||||||| || |

Sbjct 358 ACGCCGCGCGCCCCAATGTCTCCGGCTGAGCCGCCTGTCTCTAAGCGTTGTGGTCTAACT 417

Query 411 GATCGCTTGCGAGGCCCGGGCGGTTCGACGCCGTTAAAcccccc 454

| |||||| ||| | || || ||| ||||||||||| ||||

Sbjct 418 GTTCGCTTTGGAGTGCGGGTTGGGTCGTCGCCGTTAAACACCCC 461

>Readeriella patrickii CBS 124987 ITS region; from TYPE material

Sequence ID: NR_156580.1 Length: 481

Range 1: 33 to 453

Score:459 bits(248), Expect:3e-129,

Identities:376/434(87%), Gaps:24/434(5%), Strand: Plus/Plus

Query 28 CCTCCAACCCCATGTCGAAACGACTCTGTTGCCTCGGGGGCGACCCGGCCT-TCGGGCGT 86

||||||||||||||| | ||||||||||||||||||||||||||||||| ||| ||

Sbjct 33 CCTCCAACCCCATGTTG-TCCGACTCTGTTGCCTCGGGGGCGACCCGGCCTCACGGCCG- 90

Query 87 CGGGGCCCCCGGCGGACACCTTCATAACTCTTGCATCTCTTGCGTCTGAGTGATACAT-A 145

| |||||||||| |||| | || ||||| ||||||| | |||||||||| || || |

Sbjct 91 C-GGGCCCCCGGTGGACTAC-TC--AACTC-TGCATCT-TAGCGTCTGAGT-TTA-ATGA 142

Query 146 T-AATCAATCAAAACTTTCAACAACGGATCTCTTGGTTCTGGCATCGATGAAGAACGCAG 204

| ||||||| ||||||||||||||||||||||||||||||||||||||||||||||||||

Sbjct 143 TAAATCAATTAAAACTTTCAACAACGGATCTCTTGGTTCTGGCATCGATGAAGAACGCAG 202

Query 205 CGAAATGCGATAAGTAATGTGAATTGCAGAATTCAGTGAATCATCGAATCTTTGAACGCA 264

||||||||||||||||||||||||||||||||||||||||||||||||||||||||||||

Sbjct 203 CGAAATGCGATAAGTAATGTGAATTGCAGAATTCAGTGAATCATCGAATCTTTGAACGCA 262

Query 265 CATTGCGCCCCCTGGCATTCCGGGGGGCATGCCTGTTCGAGCGTCATTACACCACTCAAG 324

||||||||||| ||| |||||| ||||||||||||||||||||||||||||||| |||||

Sbjct 263 CATTGCGCCCCTTGGTATTCCGAGGGGCATGCCTGTTCGAGCGTCATTACACCAATCAAG 322

Query 325 CCTGGCTTGGTATTGAGCGACCGCGGC-CTGC----CCGCGCGCTCCAATGTCTCCGGCT 379

||||||||||||||| ||| ||| || || | |||||||| | |||||| |||||

Sbjct 323 CCTGGCTTGGTATTGGGCG-CCGTGGTTCTTCGGAGCCGCGCGCCCTAATGTCCTCGGCT 381

Query 380 GAGCCGTCCGTCTCTAAGCGTTGTGA--ATAGCGATCGCTTGCGAGGCCCGGGCGGTT-C 436

| |||||||| ||| ||||||||||| ||| ||||||||| | || || |||| |

Sbjct 382 GGGCCGTCCGCCTCGAAGCGTTGTGATTATACAGATCGCTTGTG-GGTGTGGACGGTCGC 440

Query 437 GACGCCGTTAAAcc 450

| ||||||||||||

Sbjct 441 G-CGCCGTTAAACC 453

>Parateratosphaeria marasasii CBS 122899 ITS region; from TYPE material

Sequence ID: NR_145095.1 Length: 604

Range 1: 138 to 529

Score:459 bits(248), Expect:3e-129,

Identities:353/402(88%), Gaps:13/402(3%), Strand: Plus/Plus

Query 6 GAGTGTGGCGCTCCGGCGCCTC--CCTCCAACCCCAT-GTCGAAACGACTCTGTTGCCTC 62

||||| || |||||| | ||| ||||||||||||| || |||| | ||||||||

Sbjct 138 GAGTGAGGGCCTCCGG-G-CTCGACCTCCAACCCCATTGT-TTTCCGACCCCGTTGCCTC 194

Query 63 GGGGGCGACCCGGCCTTCGGGCGTCGGGGCCCCCGGCGGACACCTTCATAACTCTTGCAT 122

||||| |||||||||||||||| | |||||||||| |||| || | ||| | |||||

Sbjct 195 GGGGGTGACCCGGCCTTCGGGC--CAGGGCCCCCGGTGGACCCCAACCAAACAC-TGCAT 251

Query 123 CTCTTGCGTCTGAGTGATACATATAATCAATCAAAACTTTCAACAACGGATCTCTTGGTT 182

|| ||||||||||||||| | ||||||| |||||||||||||||||||||||||||

Sbjct 252 CT-TTGCGTCTGAGTGAT-TAGCGAATCAATTAAAACTTTCAACAACGGATCTCTTGGTA 309

Query 183 CTGGCATCGATGAAGAACGCAGCGAAATGCGATAAGTAATGTGAATTGCAGAATTCAGTG 242

||||||||||||||||||||||||||||||||||||||||||||||||||||||||||||

Sbjct 310 CTGGCATCGATGAAGAACGCAGCGAAATGCGATAAGTAATGTGAATTGCAGAATTCAGTG 369

Query 243 AATCATCGAATCTTTGAACGCACATTGCGCCCCCTGGCATTCCGGGGGGCATGCCTGTTC 302

||||||||||||||||||||||||||||||||||||||||||||||||||||||||||||

Sbjct 370 AATCATCGAATCTTTGAACGCACATTGCGCCCCCTGGCATTCCGGGGGGCATGCCTGTTC 429

Query 303 GAGCGTCATTACACCACTCAAGCCTGGCTTGGTATTGAGCGACCGCGGCCTGCCCGCGCG 362

||||||||||||||||||||||||||||||||||||| ||| | |||| | |||||||

Sbjct 430 GAGCGTCATTACACCACTCAAGCCTGGCTTGGTATTGGGCGTC-GCGGGA-GACCGCGCG 487

Query 363 CTCCAATGTCTCCGGCTGAGCCGTCCGTCTCTAAGCGTTGTG 404

| ||| ||| ||||||| ||||||||||| ||||||||||

Sbjct 488 CCTCAAAGTCACCGGCTGGACCGTCCGTCTCCAAGCGTTGTG 529

>Nothotrimmatostroma eucalyptorum CBS 129578 ITS region; from TYPE material

Sequence ID: NR_159795.1 Length: 538

Range 1: 42 to 511

Score:457 bits(247), Expect:1e-128,

Identities:412/488(84%), Gaps:26/488(5%), Strand: Plus/Plus

Query 6 GAGTGTGGCG-CTCC-GGCGCCTCCCTCCAACCCCATGTCGAAACGACTCTGTTGCCTCG 63

||||| ||| |||| |||| | ||||||||||||||||| |||| |||||||||||

Sbjct 42 GAGTG-AGCGCCTCCGGGCG-CGACCTCCAACCCCATGTCG-TCCGACCCTGTTGCCTCG 98

Query 64 GGGGCGACCCGGCCTTCGGGCGTCGGGGCCCCCGGCGGACACCTTCATAACTCTTGCATC 123

|||| |||||||||| ||||| || | ||||||| |||| || || ||||| ||||||

Sbjct 99 GGGGTGACCCGGCCTCCGGGCCTC-GTCCCCCCGGTGGAC-CCCTC--AACTC-TGCATC 153

Query 124 TCTTGCGTCTGAGTGATAC-ATATAATCAATCAAAACTTTCAACAACGGATCTCTTGGTT 182

| ||||||| |||| || || ||||||||||||||||||||||||||||||||||||

Sbjct 154 T-TTGCGTCGGAGTCTAACGATTAAATCAATCAAAACTTTCAACAACGGATCTCTTGGTT 212

Query 183 CTGGCATCGATGAAGAACGCAGCGAAATGCGATAAGTAATGTGAATTGCAGAATTCAGTG 242

||||||||||||||||||||||||||||||||||||||||||||||||||||||||||||

Sbjct 213 CTGGCATCGATGAAGAACGCAGCGAAATGCGATAAGTAATGTGAATTGCAGAATTCAGTG 272

Query 243 AATCATCGAATCTTTGAACGCACATTGCGCCCCCTGGCATTCCGGGGGGCATGCCTGTTC 302

||||||||||||||||||||||||||||||||| ||| ||||||||||||||||||||||

Sbjct 273 AATCATCGAATCTTTGAACGCACATTGCGCCCCTTGGTATTCCGGGGGGCATGCCTGTTC 332

Query 303 GAGCGTCATTACACCACTCAAGCCTGGCTTGGTATTGAGCGACCGCGGCCTGCCCGCGCG 362

|||||||||| |||||||||||||| ||||||| ||| ||| |||||| | | |||||||

Sbjct 333 GAGCGTCATTTCACCACTCAAGCCTCGCTTGGTGTTGGGCG-CCGCGGTCCG-CCGCGCG 390

Query 363 CTCCAATGTCTCCGGCTGAGCCGTCCGTC-TCTAAGCGTTGTGAATAGCGATC--GCTTG 419

| ||||||||||||||| |||| | || || ||||| | ||| || | ||| |||

Sbjct 391 CCCCAATGTCTCCGGCTCAGCCCGACATCCTCGAAGCGATTTGACTA-CAATCCCGCTCC 449

Query 420 CGAGGCCC--GGGCGGTTCGACGCCGTTAAAcccccccATTTTCTATGGTGACCGCGGAT 477

|||| | ||||| |||||||| ||||| |||| || | | | ||||| |||||

Sbjct 450 GGAGGACGAAGGGCG---CGACGCCGCTAAACACCCC-ATCA-C-AGGTTGACCTCGGAT 503

Query 478 CAGGTAGG 485

||||||||

Sbjct 504 CAGGTAGG 511

>Phaeothecoidea minutispora ITS region; from TYPE material

Sequence ID: NR_156530.1 Length: 638

Range 1: 143 to 612

Score:457 bits(247), Expect:1e-128,

Identities:412/488(84%), Gaps:25/488(5%), Strand: Plus/Plus

Query 5 CGAGTGTGGCG-CTCC-GGCGCCTCCCTCCAACCCCATGTCGAAACGACTCTGTTGCCTC 62

|||||| ||| |||| |||| | ||||||||||||||| | | || |||||||||

Sbjct 143 CGAGTG-AGCGCCTCCGGGCG-CGACCTCCAACCCCATGTTG-TCCAACCATGTTGCCTC 199

Query 63 GGGGGCGACCCGGCCTTCGGGCGTCGGGGCCCCCGGCGGACACCTTCATAACTCTTGCAT 122

|||||||||||||||||||||| | | ||||||| |||| || || ||||| |||||

Sbjct 200 GGGGGCGACCCGGCCTTCGGGC-CCCGTCCCCCCGGTGGAC-CCCTC--AACTC-TGCAT 254

Query 123 CTCTTGCGTCTGAGTGATACAT-AT-AATCAATCAAAACTTTCAACAACGGATCTCTTGG 180

| ||||||| |||| | | || || ||||||||||||||||||||||||||||||||||

Sbjct 255 C-ATTGCGTCGGAGTCA-A-ATGATAAATCAATCAAAACTTTCAACAACGGATCTCTTGG 311

Query 181 TTCTGGCATCGATGAAGAACGCAGCGAAATGCGATAAGTAATGTGAATTGCAGAATTCAG 240

||||||||||||||||||||||||||||||||||||||||||||||||||||||||||||

Sbjct 312 TTCTGGCATCGATGAAGAACGCAGCGAAATGCGATAAGTAATGTGAATTGCAGAATTCAG 371

Query 241 TGAATCATCGAATCTTTGAACGCACATTGCGCCCCCTGGCATTCCGGGGGGCATGCCTGT 300

||||||||||||||||||||||||||||||||||| ||| |||||| |||||||||||||

Sbjct 372 TGAATCATCGAATCTTTGAACGCACATTGCGCCCCTTGGTATTCCGAGGGGCATGCCTGT 431

Query 301 TCGAGCGTCATTACACCACTCAAGCCTGGCTTGGTATTGAGCGACCGCGGCCTGCCCGCG 360

||||||||||||||||||||||||||| ||||||||||| ||| |||||| | | |||||

Sbjct 432 TCGAGCGTCATTACACCACTCAAGCCTCGCTTGGTATTGGGCG-CCGCGGTCCG-CCGCG 489

Query 361 CGCTCCAATGTCTCCGGCTGAGCCGTCCGTC-TCTAAGCGTTGTGAATAGCGATC--GCT 417

||| ||||||||| ||||| |||| | || || ||||| | ||| || | ||| |||

Sbjct 490 CGCCCCAATGTCTTCGGCTCAGCCTGACATCCTCGAAGCGATTTGATTA-CAATCCCGCT 548

Query 418 TGCGAGGCCCGGGCGGTTCGACGCCGTTAAAcccccccATTTTCTATGGTGACCGCGGAT 477

||| | || || |||||||| ||||| |||| |||| | | | ||||| |||||

Sbjct 549 AAGTAGGAC-GGCAGGCGCGACGCCGCTAAACACCCC-ATTT-C-AGGTTGACCTCGGAT 604

Query 478 CAGGTAGG 485

||||||||

Sbjct 605 CAGGTAGG 612

>Myrtapenidiella balenae ITS region; from TYPE material

Sequence ID: NR_155413.1 Length: 543

Range 1: 56 to 519

Score:457 bits(247), Expect:1e-128,

Identities:404/477(85%), Gaps:22/477(4%), Strand: Plus/Plus

Query 18 CCGGCGCCTCCCTCCAACCCCATGTCGAAACGA-CTCTGTTGCCTCGGGGGCGACCCGGC 76

||||| || ||||||||||||||| ||| ||||||||||||||||||||||||||

Sbjct 56 CCGGC-CCGACCTCCAACCCCATGT-TTTCCGACCTCTGTTGCCTCGGGGGCGACCCGGC 113

Query 77 CTTCGGGCGTCGGGGCCCCCGGCGGAC-ACCTTCATAACTCTTGCATCTCTTGCGTCTGA 135

| || ||| |||||||||| |||||| || | ||| | ||||| | |||||||||

Sbjct 114 CCTCCGGC--CGGGGCCCCCCGCGGACCCCCAACCAAAC-CCTGCAT-ACCTGCGTCTGA 169

Query 136 GT-GATACATATAATCAATCAAAACTTTCAACAACGGATCTCTTGGTTCTGGCATCGATG 194

|| || ||| | ||||||||||||||||||||||||||||||||||||||||||||||

Sbjct 170 GTCAATTGATAAATTCAATCAAAACTTTCAACAACGGATCTCTTGGTTCTGGCATCGATG 229

Query 195 AAGAACGCAGCGAAATGCGATAAGTAATGTGAATTGCAGAATTCAGTGAATCATCGAATC 254

||||||||||||||||||||||||||||||||||||||||||||||||||||||||||||

Sbjct 230 AAGAACGCAGCGAAATGCGATAAGTAATGTGAATTGCAGAATTCAGTGAATCATCGAATC 289

Query 255 TTTGAACGCACATTGCGCCCCCTGGCATTCCGGGGGGCATGCCTGTTCGAGCGTCATTAC 314

|||||||||||||||||||| |||||||||| ||||||||||||||||||||||||||

Sbjct 290 TTTGAACGCACATTGCGCCCGGTGGCATTCCGCCGGGCATGCCTGTTCGAGCGTCATTAC 349

Query 315 ACCACTCAAGCCTGGCTTGGTATTGAGCGACCGCGGCCTGCCCGCGCGC-TCCAATGTCT 373

||||||| ||||||||| ||||||| ||| ||||| | ||||||||| || || |||

Sbjct 350 ACCACTCCAGCCTGGCTGGGTATTGGGCGT-CGCGGTGTCCCCGCGCGCCTCGAA-GTCC 407

Query 374 CCGGCTGAGCCGTCCGTCTC-TAAGCGTTGTGAAT-AGCGATC-GCTTGCGAG-GCCCGG 429

||||| |||||||||||||| |||||||||||| | | | | | ||||||||| || ||

Sbjct 408 CCGGCCGAGCCGTCCGTCTCATAAGCGTTGTGATTCATCAAGCCGCTTGCGAGTGCGGGG 467

Query 430 G-CGGTTCGACGCCGTTAAAcccccccATTTTCTATGGTGACCGCGGATCAGGTAGG 485

| | || || ||||||||||| || | | | | | ||||| |||||||||||||

Sbjct 468 GGCCGT-CG-CGCCGTTAAACGACCACCT---CAAGGTTGACCTCGGATCAGGTAGG 519

>Readeriella lehmannii CPC 28935 ITS region; from TYPE material

Sequence ID: NR_155734.1 Length: 560

Range 1: 85 to 475

Score:457 bits(247), Expect:1e-128,

Identities:354/402(88%), Gaps:21/402(5%), Strand: Plus/Plus

Query 28 CCTCCAACCCCATGTCGAAACGACTCTGTTGCCTCGGGGGCGACCCGGCCT-TCGGGCGT 86

||||||||||||||| | ||||||||||||||||||||||||||||||| ||| ||

Sbjct 85 CCTCCAACCCCATGTTG-TCCGACTCTGTTGCCTCGGGGGCGACCCGGCCTCACGGCCG- 142

Query 87 CGGGGCCCCCGGCGGACACCTTCATAACTCTTGCATCTCTTGCGTCTGAGTGATACAT-A 145

| |||||||||| |||| | || ||||| ||||||| | |||||||||| || || |

Sbjct 143 C-GGGCCCCCGGTGGACTAC-TC--AACTC-TGCATCT-TAGCGTCTGAGT-TTA-ATGA 194

Query 146 T-AATCAATCAAAACTTTCAACAACGGATCTCTTGGTTCTGGCATCGATGAAGAACGCAG 204

| ||||||| ||||||||||||||||||||||||||||||||||||||||||||||||||

Sbjct 195 TAAATCAATTAAAACTTTCAACAACGGATCTCTTGGTTCTGGCATCGATGAAGAACGCAG 254

Query 205 CGAAATGCGATAAGTAATGTGAATTGCAGAATTCAGTGAATCATCGAATCTTTGAACGCA 264

||||||||||||||||||||||||||||||||||||||||||||||||||||||||||||

Sbjct 255 CGAAATGCGATAAGTAATGTGAATTGCAGAATTCAGTGAATCATCGAATCTTTGAACGCA 314

Query 265 CATTGCGCCCCCTGGCATTCCGGGGGGCATGCCTGTTCGAGCGTCATTACACCACTCAAG 324

||||||||||| ||| |||||| ||||||||||||||||||||||||||||||| |||||

Sbjct 315 CATTGCGCCCCTTGGTATTCCGAGGGGCATGCCTGTTCGAGCGTCATTACACCAATCAAG 374

Query 325 CCTGGCTTGGTATTGAGCGACCGCGGC-CTGC----CCGCGCGCTCCAATGTCTCCGGCT 379

||||||||||||||| ||| ||| ||| || | |||||||| | |||||| |||||

Sbjct 375 CCTGGCTTGGTATTGGGCG-CCGTGGCTCTTCGGAGCCGCGCGCCCTAATGTCCTCGGCT 433

Query 380 GAGCCGTCCGTCTCTAAGCGTTGTGA--ATAGCGATCGCTTG 419

| |||||| | ||||||||||||||| ||| |||||||||

Sbjct 434 GGGCCGTCTGCCTCTAAGCGTTGTGATTATACAGATCGCTTG 475

>Teratosphaeria syncarpiae ITS region; from TYPE material

Sequence ID: NR_147273.1 Length: 476

Range 1: 30 to 448

Score:457 bits(247), Expect:1e-128,

Identities:376/434(87%), Gaps:25/434(5%), Strand: Plus/Plus

Query 28 CCTCCAACCCCATGT---CGAAACGACTCTGTTGCCTCGGGGGCGACCCGGCCTTCGGGC 84

||||||||||||||| | ||| | | |||||||||||||||||||||||||| ||

Sbjct 30 CCTCCAACCCCATGTTTTCCCAAC--CAC-GTTGCCTCGGGGGCGACCCGGCCTTC--GC 84

Query 85 GTCGGGGCCCCCGGCGGACACCTTCATAACTCTTGCATCTCTTGCGTCTGAG--TGATAC 142

| |||||||||||| |||| || | ||| | ||||||| ||||||||||| |||||

Sbjct 85 GCCGGGGCCCCCGGTGGAC-CCGAC-CAACAC-TGCATCT-TTGCGTCTGAGTCTGATA- 139

Query 143 ATATAATCAATCAAAACTTTCAACAACGGATCTCTTGGTTCTGGCATCGATGAAGAACGC 202

||| ||||||||||||||||||||||||||||||||||||||||||||||||||||||||

Sbjct 140 ATA-AATCAATCAAAACTTTCAACAACGGATCTCTTGGTTCTGGCATCGATGAAGAACGC 198

Query 203 AGCGAAATGCGATAAGTAATGTGAATTGCAGAATTCAGTGAATCATCGAATCTTTGAACG 262

||||||||||||||||||||||||||||||||||||||||||||||||||||||||||||

Sbjct 199 AGCGAAATGCGATAAGTAATGTGAATTGCAGAATTCAGTGAATCATCGAATCTTTGAACG 258

Query 263 CACATTGCGCCCCCTGGCATTCCGGGGGGCATGCCTGTTCGAGCGTCATTACACCACTCA 322

|||||||||||| |||| ||||||| |||||||||||||||||||||||||||||||||

Sbjct 259 CACATTGCGCCCTCTGGTATTCCGGAGGGCATGCCTGTTCGAGCGTCATTACACCACTCC 318

Query 323 AGCCTGGCTTGGTATTGAGCGACCGCGGCCTGCCCGCGCG-CTCCAATGTCTCCGGCTGA 381

||||| ||| ||||||| ||| | ||||||| || ||||| || |||||||||||| ||

Sbjct 319 AGCCTCGCTGGGTATTGGGCGTC-GCGGCCT-CC-GCGCGTCTT-AATGTCTCCGGCCGA 374

Query 382 GCCGTCCGTCTCTAA-GCGTTGTGA-ATAGCGAT-CGCTTGCGAGGCCCGGGC-GGTTCG 437

|||| ||||||| || ||||||||| || |||| |||| | || |||| | || |

Sbjct 375 GCCGACCGTCTCCAAAGCGTTGTGACATCACGATTCGCTGGGTGGGACCGGTCCGGCGCC 434

Query 438 ACGCCGTTAAAccc 451

|||||||||||||

Sbjct 435 GCGCCGTTAAACCC 448

>Teratosphaeria dunnii CBS 145548 ITS region; from TYPE material

Sequence ID: NR_165577.1 Length: 523

Range 1: 53 to 469

Score:455 bits(246), Expect:4e-128,

Identities:376/434(87%), Gaps:27/434(6%), Strand: Plus/Plus

Query 28 CCTCCAACCCCATGT---CGAAACGACTCTGTTGCCTCGGGGGCGACCCGGCCTTCGGGC 84

||||||||||||||| | |||| | | ||||||||||||||||||||||| | ||

Sbjct 53 CCTCCAACCCCATGTTTCCCAAAC--CAC-GTTGCCTCGGGGGCGACCCGGCC-AC-CGC 107

Query 85 GTCGGGGCCCCCGGCGGACACCTTCATAACTCTTGCATCTCTTGCGTCTGAGTGATAC-A 143

| |||||||||||| |||| || || ||||| ||||||| ||||||||||| | || |

Sbjct 108 GCCGGGGCCCCCGGTGGAC-CCCTC--AACTC-TGCATCT-GTGCGTCTGAGTAACACGA 162

Query 144 TATAATCAATCAAAACTTTCAACAACGGATCTCTTGGTTCTGGCATCGATGAAGAACGCA 203

|| |||||||||||||||||||||||||||||||||||||||||||||||||||||||||

Sbjct 163 TA-AATCAATCAAAACTTTCAACAACGGATCTCTTGGTTCTGGCATCGATGAAGAACGCA 221

Query 204 GCGAAATGCGATAAGTAATGTGAATTGCAGAATTCAGTGAATCATCGAATCTTTGAACGC 263

||||||||||||||||||||||||||||||||||||||||||||||||||||||||||||

Sbjct 222 GCGAAATGCGATAAGTAATGTGAATTGCAGAATTCAGTGAATCATCGAATCTTTGAACGC 281

Query 264 ACATTGCGCCCCCTGGCATTCCGGGGGGCATGCCTGTTCGAGCGTCATTACACCACTCAA 323

||||||||||| |||| ||||||| ||||||||||||||||||||||||||||||||| |

Sbjct 282 ACATTGCGCCCTCTGGTATTCCGGAGGGCATGCCTGTTCGAGCGTCATTACACCACTCCA 341

Query 324 GCCTGGCTTGGTATTGAGCGACCGCGGCCTGCCCGCGCGC-TCCAATGTCTCCGGCTGAG 382

|||| ||| ||||||| ||| | ||||||| || |||||| || || ||||||||| |||

Sbjct 342 GCCTCGCTGGGTATTGGGCGTC-GCGGCCT-CC-GCGCGCCTCGAA-GTCTCCGGCCGAG 397

Query 383 CCGTCCGTCTCTAAGCGTTGTGA-ATAGC-GAT-CGCTTGCGAGGCCCGGGC-GGTT-CG 437

||| ||||||| |||||||||| | | | | | ||||| || || |||| | || ||

Sbjct 398 CCGACCGTCTCCAAGCGTTGTGGCACAACTGTTTCGCTTTCG-GGACCGGTCTGGCGGCG 456

Query 438 ACGCCGTTAAAccc 451

|||||||||||||

Sbjct 457 -CGCCGTTAAACCC 469

>Teratosphaeria verrucosa CBS 113621 ITS region; from TYPE material

Sequence ID: NR_157436.1 Length: 469

Range 1: 7 to 391

Score:455 bits(246), Expect:4e-128,

Identities:355/404(88%), Gaps:21/404(5%), Strand: Plus/Plus

Query 3 ATCGAGTGTGGCGCTCCGGCGCCT-CCCTCCAACCCCATGT-CGAAACGACTCTGTTGCC 60

|||||||| || || | | |||| ||||||||||||||| ||| | |||||||

Sbjct 7 ATCGAGTGAGG-GC-GC-GAGCCTGACCTCCAACCCCATGTTTCCAAC--CCATGTTGCC 61

Query 61 TCGGGGGCGACCCGGCCTTCGGGCGTCGGGGCCCCCGGCGGACACCTTCATAACTCTTGC 120

||||||||||||||||| || ||| |||||||||||| |||| || | | || | |||

Sbjct 62 TCGGGGGCGACCCGGCCGTC--GCGCCGGGGCCCCCGGTGGAC-CC--C-TCAC-CCTGC 114

Query 121 ATCTCTTGCGTCTGAGTGATACATATAATCAATCAAAACTTTCAACAACGGATCTCTTGG 180

|||| |||||||||||||||| | ||||||||||||||||||||||||||||||||||

Sbjct 115 ATCT-TTGCGTCTGAGTGATA--GA-AATCAATCAAAACTTTCAACAACGGATCTCTTGG 170

Query 181 TTCTGGCATCGATGAAGAACGCAGCGAAATGCGATAAGTAATGTGAATTGCAGAATTCAG 240

||||||||||||||||||||||||||||||||||||||||||||||||||||||||||||

Sbjct 171 TTCTGGCATCGATGAAGAACGCAGCGAAATGCGATAAGTAATGTGAATTGCAGAATTCAG 230

Query 241 TGAATCATCGAATCTTTGAACGCACATTGCGCCCCCTGGCATTCCGGGGGGCATGCCTGT 300

|||||||||||||||||||||||||||||||||| |||| ||||||| ||||||||||||

Sbjct 231 TGAATCATCGAATCTTTGAACGCACATTGCGCCCGCTGGTATTCCGGCGGGCATGCCTGT 290

Query 301 TCGAGCGTCATTACACCACTCAAGCCTGGCTTGGTATTGAGCGACCGCGGCCTGCCCGCG 360

||||||||||||||||||||| ||||| ||| |||||| ||| |||||||| ||| |||

Sbjct 291 TCGAGCGTCATTACACCACTCCAGCCTCGCTGGGTATTAGGCG-CCGCGGCC-GCC-GCG 347

Query 361 CGCTCCAATGTCTCCGGCTGAGCCGTCCGTCTCTAAGCGTTGTG 404

||| |||||||||||| |||||| ||||||||||||||||||

Sbjct 348 CGCCTTAATGTCTCCGGCCGAGCCGACCGTCTCTAAGCGTTGTG 391

>Cladosporium entadae MFLUCC 17-0919 ITS region; from TYPE material

Sequence ID: NR_163324.1 Length: 488

Range 1: 58 to 486

Score:453 bits(245), Expect:1e-127,

Identities:380/442(86%), Gaps:22/442(4%), Strand: Plus/Plus

Query 48 CGACTCTGTTGCCTCGGGGGCGACCCGGCCTTCGGGCGTCGGGGCCCCCGGCGGACACCT 107

||||||||||||||| |||||||||| ||||||||||| |||||||| || |||||| |

Sbjct 58 CGACTCTGTTGCCTCCGGGGCGACCCTGCCTTCGGGCG--GGGGCCCCGGGTGGACAC-T 114

Query 108 TCATAACTCTTGC--ATCTCTTGC-GTCTGAGTGATACAT-A-TAATCAATCAAAACTTT 162

||| ||||||||| | || |||| |||||||| | | | | |||| ||| ||||||||

Sbjct 115 TCA-AACTCTTGCGTAACT-TTGCAGTCTGAGT-AAATTTAATTAATAAATTAAAACTTT 171

Query 163 CAACAACGGATCTCTTGGTTCTGGCATCGATGAAGAACGCAGCGAAATGCGATAAGTAAT 222

||||||||||||||||||||||||||||||||||||||||||||||||||||||||||||

Sbjct 172 CAACAACGGATCTCTTGGTTCTGGCATCGATGAAGAACGCAGCGAAATGCGATAAGTAAT 231

Query 223 GTGAATTGCAGAATTCAGTGAATCATCGAATCTTTGAACGCACATTGCGCCCCCTGGCAT 282

||||||||||||||||||||||||||||||||||||||||||||||||||||||||| ||

Sbjct 232 GTGAATTGCAGAATTCAGTGAATCATCGAATCTTTGAACGCACATTGCGCCCCCTGGTAT 291

Query 283 TCCGGGGGGCATGCCTGTTCGAGCGTCATTACACCACTCAAGCCTGGCTTGGTATTGAGC 342

|||||||||||||||||||||||||||||| |||||||||||||| ||||||||||| ||

Sbjct 292 TCCGGGGGGCATGCCTGTTCGAGCGTCATTTCACCACTCAAGCCTCGCTTGGTATTGGGC 351

Query 343 GACCGCGGCCTGCCCGCGCGC-TCCAATGTCTCCGGCTGAGCCGTCCGTCTC-TAAGCGT 400

||| |||| | ||| |||||| || ||| ||||||| | | || ||| | | |||||

Sbjct 352 GAC-GCGGTCCGCC-GCGCGCCTCAAATCGA-CCGGCTGGGTCTTCTGTCCCCTCAGCGT 408

Query 401 TGTGAATAGCGAT-CGCTTGCGAG-GCCCGGGCGGTTCGACGCCGTTAAAcccccccATT 458

|||| | | | || |||| | | ||||||| || | ||||||| |||| ||||| |

Sbjct 409 TGTGGAAA-CTATTCGCTAAAGGGTGCCCGGGAGGCT--ACGCCGTAAAACAACCCCA-T 464

Query 459 TTCTATGGTGACCGCGGATCAG 480

||||| ||||||| ||||||||

Sbjct 465 TTCTAAGGTGACCTCGGATCAG 486

>Readeriella tasmanica ITS region; from TYPE material

Sequence ID: NR_157420.1 Length: 636

Range 1: 171 to 623

Score:453 bits(245), Expect:1e-127,

Identities:399/469(85%), Gaps:27/469(5%), Strand: Plus/Plus

Query 28 CCTCCAACCCCATGTCGAAACGACTCTGTTGCCTCGGGGGCGACCCGGCCT-TCGGGCGT 86

||||||||||||||| | |||| | |||||||||||||||||||||||| ||| ||

Sbjct 171 CCTCCAACCCCATGT-TATCCGACCCAGTTGCCTCGGGGGCGACCCGGCCTCACGGCCG- 228

Query 87 CGGGGCCCCCGGCGGACACCTTCATAACTCTTGCATCTCTTGCGTCTGAGTGATACAT-A 145

| |||||||||| |||| | || ||||| ||||||| | |||||||||| || || |

Sbjct 229 C-GGGCCCCCGGTGGACTAC-TC--AACTC-TGCATCT-TAGCGTCTGAGT-TTA-ATGA 280

Query 146 T-AATCAATCAAAACTTTCAACAACGGATCTCTTGGTTCTGGCATCGATGAAGAACGCAG 204

| ||||||| ||||||||||||||||||||||||||||||||||||||||||||||||||

Sbjct 281 TAAATCAATTAAAACTTTCAACAACGGATCTCTTGGTTCTGGCATCGATGAAGAACGCAG 340

Query 205 CGAAATGCGATAAGTAATGTGAATTGCAGAATTCAGTGAATCATCGAATCTTTGAACGCA 264

||||||||||||||||||||||||||||||||||||||||||||||||||||||||||||

Sbjct 341 CGAAATGCGATAAGTAATGTGAATTGCAGAATTCAGTGAATCATCGAATCTTTGAACGCA 400

Query 265 CATTGCGCCCCCTGGCATTCCGGGGGGCATGCCTGTTCGAGCGTCATTACACCACTCAAG 324

||||||||||| ||| |||||| ||||||||||||||||||||||||||||||| |||||

Sbjct 401 CATTGCGCCCCTTGGTATTCCGAGGGGCATGCCTGTTCGAGCGTCATTACACCAATCAAG 460

Query 325 CCTGGCTTGGTATTGAGCGACCGCGGC-CTGC----CCGCGCGCTCCAATGTCTCCGGCT 379

||||||||||||||| ||| ||| || || | |||||||| | |||||| |||||

Sbjct 461 CCTGGCTTGGTATTGGGCG-CCGTGGTTCTCCGGAGCCGCGCGCCCTAATGTCCTCGGCT 519

Query 380 GAGCCGTCCGTCTCTAAGCGTTGTGA--ATAGCGATCGCTTGCGAGGCCCGGGCGGTT-C 436

| |||||||| ||| ||||||||||| ||| ||||||||| | || || |||| |

Sbjct 520 GGGCCGTCCGCCTCGAAGCGTTGTGATTATACAGATCGCTTGTG-GGTGTGGACGGTCGC 578

Query 437 GACGCCGTTAAAcccccccATTTTCTATGGTGACCGCGGATCAGGTAGG 485

| |||||||||||| | ||| | | | ||||| |||||||||||||

Sbjct 579 G-CGCCGTTAAACCTTTC-ATT--CAAGGTTGACCTCGGATCAGGTAGG 623

>Cladosporium endophyticum MFLUCC 17-0599 ITS region; from TYPE material

Sequence ID: NR_158360.1 Length: 581

Range 1: 106 to 541

Score:453 bits(245), Expect:1e-127,

Identities:385/449(86%), Gaps:24/449(5%), Strand: Plus/Plus

Query 48 CGACTCTGTTGCCTCGGGGGCGACCCGGCCTTCGGGCGTCGGGGCCCCCGGCGGACACCT 107

||||||||||||||| |||||||||| |||| |||||| |||||||| || |||||| |

Sbjct 106 CGACTCTGTTGCCTCCGGGGCGACCCTGCCTCCGGGCG--GGGGCCCCGGGTGGACAC-T 162

Query 108 TCATAACTCTTGC--ATCTCTTGC-GTCTGAGTGATACAT-A-TAATCAATCAAAACTTT 162

||| ||||||||| | || |||| |||||||| | | | | |||| ||| ||||||||

Sbjct 163 TCA-AACTCTTGCGTAACT-TTGCAGTCTGAGT-AAATTTAATTAATAAATTAAAACTTT 219

Query 163 CAACAACGGATCTCTTGGTTCTGGCATCGATGAAGAACGCAGCGAAATGCGATAAGTAAT 222

||||||||||||||||||||||||||||||||||||||||||||||||||||||||||||

Sbjct 220 CAACAACGGATCTCTTGGTTCTGGCATCGATGAAGAACGCAGCGAAATGCGATAAGTAAT 279

Query 223 GTGAATTGCAGAATTCAGTGAATCATCGAATCTTTGAACGCACATTGCGCCCCCTGGCAT 282

||||||||||||||||||||||||||||||||||||||||||||||||||||||||| ||

Sbjct 280 GTGAATTGCAGAATTCAGTGAATCATCGAATCTTTGAACGCACATTGCGCCCCCTGGTAT 339

Query 283 TCCGGGGGGCATGCCTGTTCGAGCGTCATTACACCACTCAAGCCTGGCTTGGTATTGAGC 342

|||||||||||||||||||||||||||||| |||||||||||||| ||||||||||| ||

Sbjct 340 TCCGGGGGGCATGCCTGTTCGAGCGTCATTTCACCACTCAAGCCTCGCTTGGTATTGGGC 399

Query 343 GACCGCGGCCTGCCCGCGCGC-TCCAATGTCTCCGGCTGAGCCGTCCGTCTC-TAAGCGT 400

||| |||| | ||| |||||| || ||| ||||||| | | |||||| | | |||||

Sbjct 400 GAC-GCGGTCCGCC-GCGCGCCTCAAATCGA-CCGGCTGGGTCTTCCGTCCCCTCAGCGT 456

Query 401 TGTGAATAGCGAT-CGCTTGCGAG-GCC-CGGGCGGTTCGACGCCGTTAAAcccccccAT 457

|||| | | | || |||| | | ||| |||| ||| | |||||| |||| ||||||

Sbjct 457 TGTGGAAA-CTATTCGCTAAAGGGTGCCGCGGGAGGT-C-ACGCCGCAAAACAACCCCAT 513

Query 458 TTTCTATGG-TGACCGCGGATCAGGTAGG 485

|| ||| || ||||| |||||||||||||

Sbjct 514 TT-CTAAGGTTGACCTCGGATCAGGTAGG 541

>Acrodontium pigmentosum CBS 111111 ITS region; from TYPE material

Sequence ID: NR_154721.1 Length: 544

Range 1: 67 to 441

Score:453 bits(245), Expect:1e-127,

Identities:340/384(89%), Gaps:13/384(3%), Strand: Plus/Plus

Query 28 CCTCCAACCCCATGTCGAAACGACTCTGTTGCCTCGGGGGCGACCC--GG-CCTTC-GGG 83

|||||||||| ||||| |||||||||||||||||||||||||| || ||||| |||

Sbjct 67 CCTCCAACCCTTTGTCG-TCCGACTCTGTTGCCTCGGGGGCGACCCCAGGCCCTTCGGGG 125

Query 84 CGTCGGGGCCCCCGGCGGACACCTTCATAACTCTTGCATCTCTTGCGTCTGAGTGATACA 143

| ||||| ||||| || || || ||||| ||||||| |||||||||||| | |||

Sbjct 126 CCGGGGGGCTCCCGGTGG--TCC-ACACAACTC-TGCATCT-TTGCGTCTGAGT-AAACA 179

Query 144 TATAATCAATCAAAACTTTCAACAACGGATCTCTTGGTTCTGGCATCGATGAAGAACGCA 203

| ||| || ||||||||||||||||||||||||||||||||||||||||||||||||||

Sbjct 180 TTAAATGAAACAAAACTTTCAACAACGGATCTCTTGGTTCTGGCATCGATGAAGAACGCA 239

Query 204 GCGAAATGCGATAAGTAATGTGAATTGCAGAATTCAGTGAATCATCGAATCTTTGAACGC 263

||||||||||||||||||||||||||||||||||||||||||||||||||||||||||||

Sbjct 240 GCGAAATGCGATAAGTAATGTGAATTGCAGAATTCAGTGAATCATCGAATCTTTGAACGC 299

Query 264 ACATTGCGCCCCCTGGCATTCCGGGGGGCATGCCTGTTCGAGCGTCATTACACCACTCAA 323

|||||||||||| ||| |||||||||||||||||||||||||||||||||||||||||||

Sbjct 300 ACATTGCGCCCCTTGGTATTCCGGGGGGCATGCCTGTTCGAGCGTCATTACACCACTCAA 359

Query 324 GCCTGGCTTGGTATTGAGCGACCGCGGCCTGCCCGCGCGCTCCAATGTCTCCGGCTGAGC 383

|||||||||||||||| ||| ||||| || | | |||||| | |||||| ||||| |||

Sbjct 360 GCCTGGCTTGGTATTGGGCG-CCGCGCCCCGTC-GCGCGCCCTAATGTCGCCGGCCGAGT 417

Query 384 CGTCCGTCTCTAAGCGTTGTGAAT 407

|||| ||||| ||||||||||||

Sbjct 418 CGTCTGTCTCCGAGCGTTGTGAAT 441

>Myrtapenidiella eucalypti ITS region; from TYPE material

Sequence ID: NR_145120.1 Length: 478

Range 1: 9 to 478

Score:453 bits(245), Expect:1e-127,

Identities:410/486(84%), Gaps:25/486(5%), Strand: Plus/Plus

Query 5 CGAGTGTGGCGCTCCGGCGCCTCCCTCCAACCCCATGT--CGAAACGACTCTGTTGCCTC 62

|||||| || | ||||| || ||||||||||||||| ||| ||||||||||||

Sbjct 9 CGAGTGAGGGCCCCCGGC-CCGACCTCCAACCCCATGTTTTCCAAC--CTCTGTTGCCTC 65

Query 63 GGGGGCGACCCGGCCTTCGGGCGTCGGGGCCCCCGGCGGACACCTTCATAACTCTTGCAT 122

||||||||||||||| | ||| |||||||||| |||||| | | ||| | |||||

Sbjct 66 GGGGGCGACCCGGCC--CCGGC--CGGGGCCCCCCGCGGACCTCAACCAAAC-CCTGCAT 120

Query 123 CTCTTGCGTCTGAGT-GATACATATAATCAATCAAAACTTTCAACAACGGATCTCTTGGT 181

|| ||||||||||| || ||| | |||||||||||||||||||||||||||||||||

Sbjct 121 ATC-TGCGTCTGAGTCAATTGATAAATTCAATCAAAACTTTCAACAACGGATCTCTTGGT 179

Query 182 TCTGGCATCGATGAAGAACGCAGCGAAATGCGATAAGTAATGTGAATTGCAGAATTCAGT 241

||||||||||||||||||||||||||||||||||||||||||||||||||||||||||||

Sbjct 180 TCTGGCATCGATGAAGAACGCAGCGAAATGCGATAAGTAATGTGAATTGCAGAATTCAGT 239

Query 242 GAATCATCGAATCTTTGAACGCACATTGCGCCCCCTGGCATTCCGGGGGGCATGCCTGTT 301

||||||||||||||||||||||||||||||||| |||||||||| |||||||||||||

Sbjct 240 GAATCATCGAATCTTTGAACGCACATTGCGCCCGGTGGCATTCCGCCGGGCATGCCTGTT 299

Query 302 CGAGCGTCATTACACCACTCAAGCCTGGCTTGGTATTGAGCGACCGCGGCCTGCCCGCGC 361

|||||||||||||||||||| ||||||||| ||||||| ||| ||||| | |||||||

Sbjct 300 CGAGCGTCATTACACCACTCCAGCCTGGCTGGGTATTGGGCGT-CGCGGGGTCCCCGCGC 358

Query 362 GC-TCCAATGTCTCCGGCTGAGCCGTCCGTCTC-TAAGCGTTGTGAA-TAGCGATC-GCT 417

|| || || ||||||||| |||||||||||||| |||||||||||| || | | | |||

Sbjct 359 GCCTCGAA-GTCTCCGGCCGAGCCGTCCGTCTCATAAGCGTTGTGATCTATCAAGCCGCT 417

Query 418 TGCGAGGCCCGGGCGGT--TCGACGCCGTTAAAcccccccATTTTCTATGGTGACCGCGG 475

|||||| | |||| || ||| ||||||||||| || || | | | | ||||| |||

Sbjct 418 TGCGAG-CTCGGGGGGCCGTCG-CGCCGTTAAACGACC--ATCT-CAAGGTTGACCTCGG 472

Query 476 ATCAGG 481

||||||

Sbjct 473 ATCAGG 478

>Penidiella columbiana CBS 486.80 ITS region; from TYPE material

Sequence ID: NR_156579.1 Length: 478

Range 1: 9 to 403

Score:453 bits(245), Expect:1e-127,

Identities:359/410(88%), Gaps:24/410(5%), Strand: Plus/Plus

Query 5 CGAGTGTGGCGCTCCGGCGCCTCCCTCCAACCCCATGTCGA--AACG--A-CTCTGTTGC 59

|||||| | |||||||| || |||||||||| ||| || | || | ||| |||||

Sbjct 9 CGAGTGAAGGGCTCCGGC-CCGACCTCCAACCCTTTGT-GATTACCGAAACCTC-GTTGC 65

Query 60 CTCGGGGGCGACCCGGCCTTCGGGCGTCGGGGCCCCCGGCGGACACCTTCATAACTCTTG 119

||||||||||||||||||| || | ||||||||||||||||| | || ||| | ||

Sbjct 66 CTCGGGGGCGACCCGGCCTCACGG-G-CGGGGCCCCCGGCGGACCAC-TC--AAC-CCTG 119

Query 120 CATCTCTTGCGTCTGAGTGATACATA-T-AA-TCAATCAAAACTTTCAACAACGGATCTC 176

|||||| ||||||||||| | | ||| | || | ||||||||||||||||||||||||||

Sbjct 120 CATCTC-TGCGTCTGAGT-ACA-ATATTGAATTGAATCAAAACTTTCAACAACGGATCTC 176

Query 177 TTGGTTCTGGCATCGATGAAGAACGCAGCGAAATGCGATAAGTAATGTGAATTGCAGAAT 236

||||||||||||||||||||||||||||||||||||||||||||||||||||||||||||

Sbjct 177 TTGGTTCTGGCATCGATGAAGAACGCAGCGAAATGCGATAAGTAATGTGAATTGCAGAAT 236

Query 237 TCAGTGAATCATCGAATCTTTGAACGCACATTGCGCCCCCTGGCATTCCGGGGGGCATGC 296

||||||||||||||||||||||||||||||||||||||| ||| ||||||||||||||||

Sbjct 237 TCAGTGAATCATCGAATCTTTGAACGCACATTGCGCCCCTTGGTATTCCGGGGGGCATGC 296

Query 297 CTGTTCGAGCGTCATTACACCACTCAAGCCTGGCTTGGTATTGAGCGACCGCGGCCTGCC 356

||||||||||||||||||||||||||||||||||||||||||| ||| | ||||| | ||

Sbjct 297 CTGTTCGAGCGTCATTACACCACTCAAGCCTGGCTTGGTATTGGGCGTC-GCGGC-T-CC 353

Query 357 CGCGCGCTCCAATGTCTCCGGCTGAGCCGTCCGTCTCT-AAGCGTTGTGA 405

||||||| ||||||||||||| | | ||||| |||| |||||||||||

Sbjct 354 CGCGCGCCTCAATGTCTCCGGCGGGGTCGTCCACCTCTTAAGCGTTGTGA 403

>Teratosphaeria profusa CBS 125007 ITS region; from TYPE material

Sequence ID: NR_156578.1 Length: 473

Range 1: 30 to 395

Score:453 bits(245), Expect:1e-127,

Identities:341/383(89%), Gaps:23/383(6%), Strand: Plus/Plus

Query 28 CCTCCAACCCCATGTC---GAAACGACTCTGTTGCCTCGGGGGCGACCCGGCCTTCGGGC 84

|||||||||||||||| |||| | ||||||||||||||||||||||| || ||

Sbjct 30 CCTCCAACCCCATGTCTCCCAAAC--C-ATGTTGCCTCGGGGGCGACCCGGC---CGCGC 83

Query 85 GTCGGGGCCCCCGGCGGACACCTTCATAACTCTTGCATCTCTTGCGTCTGAGTGATAC-A 143

| |||||||||| |||||| || || ||||| ||||||| ||||||||||| | || |

Sbjct 84 GCCGGGGCCCCCCGCGGAC-CCCTC--AACTC-TGCATCT-GTGCGTCTGAGT-A-ACGA 136

Query 144 TAT-AATCAATCAAAACTTTCAACAACGGATCTCTTGGTTCTGGCATCGATGAAGAACGC 202

|| ||||||||||||||||||||||||||||||||||||||||||||||||||||||||

Sbjct 137 AATCAATCAATCAAAACTTTCAACAACGGATCTCTTGGTTCTGGCATCGATGAAGAACGC 196

Query 203 AGCGAAATGCGATAAGTAATGTGAATTGCAGAATTCAGTGAATCATCGAATCTTTGAACG 262

||||||||||||||||||||||||||||||||||||||||||||||||||||||||||||

Sbjct 197 AGCGAAATGCGATAAGTAATGTGAATTGCAGAATTCAGTGAATCATCGAATCTTTGAACG 256

Query 263 CACATTGCGCCCCCTGGCATTCCGGGGGGCATGCCTGTTCGAGCGTCATTACACCACTCA 322

|||||||||||| |||| ||||||| |||||||||||||||||||||||||||||||||

Sbjct 257 CACATTGCGCCCTCTGGTATTCCGGAGGGCATGCCTGTTCGAGCGTCATTACACCACTCC 316

Query 323 AGCCTGGCTTGGTATTGAGCGACCGCGGCCTGCCCGCGCGC-TCCAATGTCTCCGGCTGA 381

||||| ||| ||||||| ||| ||||||||| || |||||| || || ||||||||| ||

Sbjct 317 AGCCTCGCTGGGTATTGGGCG-CCGCGGCCT-CC-GCGCGCCTCGAA-GTCTCCGGCCGA 372

Query 382 GCCGTCCGTCTCTAAGCGTTGTG 404

|||| ||||||| ||||||||||

Sbjct 373 GCCGACCGTCTCCAAGCGTTGTG 395
